# Supplementary material for: Significant Genes Associated with Mortality and Disease Progression in Grade II and III Glioma
Source: Biomedicines. 2024 Apr 12;12(4):858. doi: 10.3390/biomedicines12040858 (PMC11048596; doi:10.3390/biomedicines12040858)
Supplement: Supplementary file 1 [file biomedicines-12-00858-s001.zip › Supplementary Data1.xlsx]

## Sheet: Table S1 Raw data for the study
mRNA expression data for these 34 genes from the TCGA database of 515 LGG cases
Case	Histological_type	Diagnosis	TCGA	OS	OS_time_months	PFS	PFS_time_months	Group_anaplastic	@@@@@	Sex	Age_at_pathology	Tumor_grade	Group_astro_oligo	Karnofsky	Radiation	Tumor_laterality	@@@Wnt_gene	Adjuvant_Postoperative_Targeted_Therapy	IDH1_mutation	Tumor_location	Adjuvant_therapy	First_presenting_symptom	AKT1	AKT1_2	AKT2	AKT2_2	AKT3	AKT3_2	ANKRD6	ANKRD6_2	APC	APC_2	AXIN1	AXIN1_2	AXIN2	AXIN2_2	CBY1	CBY1_2	CER1	CER1_2	CSNK1A1	CSNK1A1_2	CTNNB1	CTNNB1_2	CXXC4	CXXC4_2	DACT1	DACT1_2	DKK1
1	Astrocytoma	0	TCGA-CS-4938	0	117.41	0	117.41	0	#NULL!	1	31	0	0	90	0	0	#NULL!	#NULL!	#NULL!	Supratentorial, Frontal Lobe	0	Seizures	7.56771	0	7.37691	0	7.02924	0	6.40275	0	8.76778	1	6.47446	0	5.28056	1	6.85366	1	1.98696	1	8.45469	1	8.97221	1	3.63549	0	4.25767	0	0.609276
2	Astrocytoma	3	TCGA-CS-4941	1	7.69	1	0.3	1	#NULL!	0	67	1	0	90	1	0	#NULL!	#NULL!	#NULL!	Supratentorial, Frontal Lobe	0	Headaches	7.98143	0	7.68411	1	6.91254	0	5.87596	0	8.485	1	7.07218	1	5.02364	0	6.72076	1	1.22832	1	8.34442	1	9.00983	1	4.05934	0	5.04943	1	2.15076
3	Astrocytoma	3	TCGA-CS-4942	1	43.86	1	38.9	1	#NULL!	1	44	1	0	90	1	0	#NULL!	#NULL!	#NULL!	Supratentorial, Frontal Lobe	0	Mental Status Changes	7.55865	0	8.01976	1	6.96292	0	6.65152	0	8.22427	0	6.78958	1	4.95625	0	6.37766	1	0.712018	1	8.40053	1	9.14945	1	4.59085	1	4.41892	0	3.98146
4	Astrocytoma	3	TCGA-CS-4943	1	36.33	1	36.33	1	#NULL!	0	37	1	0	50	0	1	#NULL!	#NULL!	#NULL!	Supratentorial, Frontal Lobe	0	Seizures	8.17148	1	7.70008	1	7.78455	1	6.52281	0	8.40911	1	7.0846	1	5.04814	0	5.77012	0	0	0	8.54047	1	9.02419	1	4.88835	1	4.74603	0	1.97344
5	Astrocytoma	0	TCGA-CS-4944	0	60.05	0	60.05	0	#NULL!	0	50	0	0	90	1	0	#NULL!	#NULL!	#NULL!	Supratentorial, Temporal Lobe	0	Mental Status Changes	7.97733	0	7.86071	1	6.65569	0	5.33051	0	8.438	1	6.27774	0	5.01255	0	6.73	1	0	0	8.36861	1	9.16887	1	3.37566	0	6.71857	1	1.51083
6	Oligodendroglioma	1	TCGA-CS-5390	1	64.6	1	64.6	0	#NULL!	1	47	0	1	100	1	0	#NULL!	#NULL!	#NULL!	Supratentorial, Parietal Lobe	0	Sensory Changes	8.00789	0	7.37998	0	7.55328	1	6.51455	0	8.25796	0	6.81724	1	4.96229	0	5.81892	0	0	0	8.44749	1	8.8016	0	4.9808	1	5.26677	1	3.03095
7	Astrocytoma	3	TCGA-CS-5393	0	40.14	0	40.14	1	#NULL!	0	39	1	0	100	1	1	#NULL!	#NULL!	#NULL!	Supratentorial, Temporal Lobe	0	Headaches	8.0622	1	7.59777	1	7.73414	1	6.75119	1	8.66333	1	6.80724	1	5.25861	1	6.11775	0	0	0	8.38799	1	9.0622	1	4.99901	1	4.99901	1	1.34138
8	Astrocytoma	3	TCGA-CS-5394	0	0.26	0	0.26	1	#NULL!	0	40	1	0	100	0	1	#NULL!	#NULL!	#NULL!	Supratentorial, Frontal Lobe	0	Seizures	7.98791	0	7.06843	0	7.85702	1	6.68	1	8.84883	1	6.52085	0	4.97082	0	6.00007	0	0	0	8.57086	1	9.04101	1	5.50899	1	5.08506	1	2.59366
9	Oligodendroglioma	1	TCGA-CS-5395	1	20.99	1	9.43	0	#NULL!	0	43	0	1	90	1	0	#NULL!	#NULL!	#NULL!	Supratentorial, Parietal Lobe	0	[Not Available]	7.75787	0	8.01009	1	7.15045	0	7.1389	1	8.83341	1	6.50126	0	5.74284	1	6.85396	1	0.554172	1	8.42369	1	9.35857	1	4.47745	1	5.95793	1	3.84035
10	Oligodendroglioma	4	TCGA-CS-5396	0	53.58	0	53.58	1	#NULL!	1	53	1	1	90	1	0	#NULL!	#NULL!	#NULL!	Supratentorial, Frontal Lobe	0	Headaches	7.91645	0	6.85791	0	7.70562	1	6.91108	1	8.38267	1	6.40782	0	4.48912	0	5.63959	0	0	0	8.32019	1	8.96353	1	5.23224	1	3.97314	0	3.28724
11	Astrocytoma	3	TCGA-CS-5397	1	6.37	1	6.37	1	#NULL!	1	54	1	0	80	1	1	#NULL!	#NULL!	#NULL!	Supratentorial, Temporal Lobe	0	Sensory Changes	7.96462	0	7.50375	0	7.39056	1	6.29537	0	8.94292	1	6.3413	0	4.93318	0	6.02053	0	0.28968	1	8.45416	1	9.34723	1	4.08543	0	5.64873	1	4.49658
12	Oligoastrocytoma	2	TCGA-CS-6186	1	17.67	1	6.18	0	#NULL!	0	58	1	2	90	1	0	#NULL!	#NULL!	#NULL!	Supratentorial, Frontal Lobe	0	Seizures	7.9821	0	8.58963	1	5.24561	0	6.79335	1	8.78481	1	6.86694	1	4.80629	0	6.05886	0	0.402394	1	8.34275	1	8.48867	0	4.21764	1	5.76835	1	1.09239
13	Astrocytoma	3	TCGA-CS-6188	1	26.74	1	21.25	1	#NULL!	0	48	1	0	90	1	0	#NULL!	#NULL!	#NULL!	Supratentorial, Temporal Lobe	0	Seizures	8.09951	1	7.47191	0	6.92274	0	6.75052	1	8.72008	1	6.51973	0	4.68	0	6.42013	1	0.734769	1	8.6856	1	8.95601	1	3.95114	0	4.91192	0	0.734769
14	Astrocytoma	3	TCGA-CS-6290	1	37.35	1	37.35	1	#NULL!	0	31	1	0	90	1	1	#NULL!	#NULL!	#NULL!	Supratentorial, Temporal Lobe	0	Seizures	8.12236	1	7.51138	0	7.13006	0	6.41788	0	8.22179	0	6.67186	0	5.41904	1	6.7532	1	0.358443	1	8.35296	1	8.77434	0	4.04374	0	4.60232	0	2.80449
15	Astrocytoma	3	TCGA-CS-6665	0	51.51	0	51.51	1	#NULL!	1	51	1	0	90	1	0	#NULL!	#NULL!	#NULL!	Supratentorial, Temporal Lobe	0	Seizures	8.0866	1	7.47923	0	7.28764	0	6.36816	0	8.03042	0	6.45116	0	4.72264	0	6.05472	0	2.52761	1	8.26412	0	8.90424	1	4.68619	1	5.74452	1	0.856838
16	Astrocytoma	3	TCGA-CS-6666	0	46.91	0	46.91	1	#NULL!	0	22	1	0	90	1	0	#NULL!	#NULL!	#NULL!	Supratentorial, Parietal Lobe	0	Headaches	7.90582	0	7.60109	1	7.70172	1	6.20911	0	8.11387	0	6.9072	1	5.38748	1	6.4756	1	0.976219	1	8.06072	0	9.17617	1	4.24953	1	4.59119	0	2.18138
17	Astrocytoma	0	TCGA-CS-6667	0	48.26	0	48.26	0	#NULL!	1	39	0	0	90	1	1	#NULL!	#NULL!	#NULL!	Supratentorial, Parietal Lobe	0	Motor/Movement Changes	7.90678	0	7.65845	1	7.68503	1	6.36216	0	8.19179	0	6.66872	0	5.53205	1	6.52431	1	0	0	8.40218	1	8.89912	1	4.3371	1	4.51878	0	0.535791
18	Oligodendroglioma	1	TCGA-CS-6668	0	49.9	0	49.9	0	#NULL!	1	57	0	1	90	0	1	#NULL!	#NULL!	#NULL!	Supratentorial, Frontal Lobe	0	Seizures	7.53512	0	7.36401	0	8.00815	1	6.67741	1	8.52468	1	6.94954	1	4.84931	0	5.79071	0	0	0	8.35319	1	9.40802	1	5.09528	1	4.16512	0	2.01175
19	Oligodendroglioma	1	TCGA-CS-6669	0	49.08	0	49.08	0	#NULL!	1	26	0	1	90	0	0	#NULL!	#NULL!	#NULL!	Supratentorial, Temporal Lobe	0	Headaches	7.62122	0	6.90283	0	8.15605	1	7.00422	1	9.1856	1	5.85955	0	4.80046	0	5.68594	0	0.860989	1	8.10651	0	8.78644	0	4.0972	0	5.45162	1	2.11417
20	Oligodendroglioma	4	TCGA-CS-6670	0	46.85	0	46.85	1	#NULL!	0	43	1	1	80	#NULL!	0	#NULL!	#NULL!	#NULL!	Supratentorial, Temporal Lobe	1	Headaches	8.0913	1	7.0738	0	7.46219	1	6.94994	1	8.56164	1	6.7846	1	5.31907	1	6.33021	1	0	0	8.21609	0	8.92296	1	4.26654	1	5.89618	1	3.2058
21	Oligoastrocytoma	2	TCGA-DB-5270	0	122.63	0	122.63	0	#NULL!	1	38	1	2	60	0	1	#NULL!	#NULL!	#NULL!	Supratentorial, Frontal Lobe	0	Seizures	7.90565	0	6.98796	0	7.64524	1	6.60928	0	8.77958	1	6.53232	0	5.04926	0	6.20141	0	0.293341	1	8.19116	0	8.74397	0	4.46889	1	5.33074	1	3.60548
22	Astrocytoma	3	TCGA-DB-5273	0	81.9	0	81.9	1	#NULL!	0	33	1	0	80	1	0	#NULL!	#NULL!	#NULL!	Supratentorial, Frontal Lobe	0	Seizures	8.12336	1	7.54955	1	7.10747	0	7.07364	1	8.2914	1	6.67942	0	5.1149	0	6.89008	1	0.60366	1	8.42154	1	9.08973	1	4.03482	0	4.61799	0	2.84273
23	Oligoastrocytoma	2	TCGA-DB-5274	0	75.2	0	75.2	0	#NULL!	1	37	1	2	80	1	1	#NULL!	#NULL!	#NULL!	Supratentorial, Frontal Lobe	0	Headaches	7.59766	0	6.78353	0	5.99253	0	6.46935	0	7.32379	0	6.4732	0	3.91839	0	6.64687	1	0	0	8.59327	1	8.79445	0	3.67644	0	4.75804	0	2.52527
24	Oligoastrocytoma	2	TCGA-DB-5275	0	47.9	0	47.9	0	#NULL!	0	36	1	2	80	1	0	#NULL!	#NULL!	#NULL!	Supratentorial, Temporal Lobe	0	Headaches	7.99663	0	7.97049	1	7.37375	1	7.38611	1	8.28686	1	6.83565	1	5.56454	1	6.43126	1	0.693047	1	8.39576	1	8.61558	0	4.23868	1	5.36884	1	2.03666
25	Oligoastrocytoma	2	TCGA-DB-5276	0	72.86	0	72.86	0	#NULL!	0	32	1	2	#NULL!	1	1	#NULL!	#NULL!	#NULL!	Supratentorial, Frontal Lobe	0	Seizures	7.92263	0	7.24883	0	7.30332	0	6.71493	1	8.40265	1	6.33754	0	4.82319	0	6.29647	0	0	0	8.21867	0	8.82153	0	3.87061	0	4.98603	0	2.80542
26	Astrocytoma	3	TCGA-DB-5277	1	50.82	1	37.98	1	#NULL!	0	34	1	0	100	1	1	#NULL!	#NULL!	#NULL!	Supratentorial, Frontal Lobe	0	Seizures	7.93318	0	7.6702	1	7.97134	1	6.64781	0	8.29649	1	6.64462	0	5.29411	1	5.81157	0	0.531804	1	7.93356	0	8.38426	0	4.39912	1	4.929	0	1.99034
27	Oligodendroglioma	1	TCGA-DB-5278	0	91.06	1	16.66	0	#NULL!	0	17	0	1	80	0	1	#NULL!	#NULL!	#NULL!	Supratentorial, Frontal Lobe	0	Seizures	7.95115	0	7.03817	0	7.4387	1	7.28433	1	8.52967	1	6.52892	0	5.41024	1	6.15552	0	0.482303	1	8.33207	1	9.05265	1	4.31011	1	5.3641	1	2.2036
28	Oligodendroglioma	1	TCGA-DB-5279	0	44.48	1	22.83	0	#NULL!	0	59	0	1	80	0	0	#NULL!	#NULL!	#NULL!	Supratentorial, Frontal Lobe	0	Seizures	7.6675	0	7.03363	0	7.58159	1	6.68789	1	8.8568	1	6.46074	0	6.47654	1	6.17851	0	0	0	8.16347	0	9.53232	1	3.95183	0	6.07404	1	1.52569
29	Oligoastrocytoma	2	TCGA-DB-5280	0	36.53	0	36.53	0	#NULL!	0	43	0	2	80	0	0	#NULL!	#NULL!	#NULL!	Supratentorial, Frontal Lobe	0	Seizures	8.0228	0	7.66551	1	7.47591	1	5.87188	0	8.72346	1	6.5293	0	5.95479	1	6.53227	1	0.719156	1	8.34717	1	8.99047	1	4.67586	1	4.69849	0	3.77988
30	Oligoastrocytoma	2	TCGA-DB-5281	0	78.22	0	78.22	0	#NULL!	0	61	1	2	80	1	1	#NULL!	#NULL!	#NULL!	Supratentorial, Frontal Lobe	0	Seizures	7.92072	0	7.59877	1	7.6975	1	6.60128	0	8.54418	1	6.5679	0	4.94026	0	6.0526	0	0	0	8.25375	0	8.88226	1	4.78765	1	4.64262	0	1.68991
31	Oligoastrocytoma	2	TCGA-DB-A4X9	0	46.39	1	16.46	0	#NULL!	1	33	0	2	80	0	1	#NULL!	0	1	Supratentorial, Temporal Lobe	0	Seizures	8.07083	1	7.81533	1	6.96598	0	6.77279	1	8.18763	0	6.93701	1	4.91591	0	6.48863	1	0	0	8.24978	0	8.53783	0	4.14434	0	4.61666	0	1.53719
32	Oligoastrocytoma	2	TCGA-DB-A4XA	0	18.82	0	18.82	0	#NULL!	0	30	0	2	80	1	1	#NULL!	0	1	Supratentorial, Parietal Lobe	0	Seizures	8.23634	1	7.29588	0	6.9908	0	6.78314	1	8.06304	0	7.07879	1	5.5426	1	6.50092	1	0	0	8.18133	0	8.78086	0	3.01192	0	5.15491	1	1.46166
33	Astrocytoma	3	TCGA-DB-A4XB	0	30.19	0	30.19	1	#NULL!	0	38	1	0	100	1	1	#NULL!	1	1	Supratentorial, Parietal Lobe	0	Seizures	8.19639	1	7.87793	1	7.77229	1	6.88165	1	8.52775	1	6.88836	1	5.10986	0	6.30305	1	0.428791	1	8.43092	1	8.82248	0	5.16176	1	5.40081	1	1.43803
34	Oligoastrocytoma	2	TCGA-DB-A4XC	0	46.68	0	46.68	0	#NULL!	0	26	0	2	80	1	1	#NULL!	0	#NULL!	Supratentorial, Temporal Lobe	0	Seizures	8.04692	1	7.72767	1	7.5372	1	6.88782	1	8.14861	0	6.55623	0	5.25157	1	6.2646	0	0.493598	1	8.26221	0	8.72072	0	4.30069	1	5.02967	1	1.90858
35	Astrocytoma	3	TCGA-DB-A4XD	0	39.75	0	39.75	1	#NULL!	0	32	1	0	80	1	0	#NULL!	1	#NULL!	Supratentorial, Temporal Lobe	0	[Not Available]	8.02235	0	7.56441	1	7.58211	1	7.14387	1	8.24683	0	6.79348	1	5.34191	1	6.1799	0	0	0	8.45141	1	8.87562	1	4.61417	1	4.37442	0	0.670902
36	Oligoastrocytoma	2	TCGA-DB-A4XE	0	37.42	0	37.42	0	#NULL!	1	27	1	2	90	1	1	#NULL!	0	#NULL!	Supratentorial, Temporal Lobe	0	Seizures	7.97018	0	7.7784	1	7.25436	0	7.01855	1	8.32617	1	6.86608	1	5.08882	0	6.26329	0	0.376654	1	8.30717	0	8.67048	0	4.07122	0	5.0762	1	1.71806
37	Astrocytoma	3	TCGA-DB-A4XF	0	33.54	1	15.37	1	#NULL!	1	41	1	0	80	1	0	#NULL!	1	#NULL!	Supratentorial, Frontal Lobe	0	Seizures	7.94044	0	7.50906	0	7.54657	1	6.36963	0	8.28285	0	6.26491	0	5.50726	1	5.99992	0	0	0	8.46525	1	8.72652	0	4.54834	1	4.24566	0	2.69195
38	Oligodendroglioma	4	TCGA-DB-A4XG	0	72.9	0	72.9	1	#NULL!	0	34	1	1	80	0	0	#NULL!	1	0	Supratentorial, Frontal Lobe	0	Seizures	8.02928	1	7.34964	0	7.53471	1	6.72612	1	8.2934	1	6.81398	1	5.10132	0	6.01292	0	0	0	8.38489	1	8.83141	1	4.79948	1	4.75702	0	3.49939
39	Oligoastrocytoma	2	TCGA-DB-A4XH	0	31.6	0	31.6	0	#NULL!	1	53	0	2	80	0	1	#NULL!	0	#NULL!	Supratentorial, Frontal Lobe	0	Seizures	8.09733	1	7.30144	0	7.44255	1	6.54997	0	8.69429	1	6.92258	1	5.38299	1	5.95776	0	0	0	8.12106	0	8.81209	0	4.30959	1	5.69507	1	2.22779
40	Oligodendroglioma	1	TCGA-DB-A64L	0	24.18	1	23.78	0	#NULL!	1	67	0	1	70	0	0	#NULL!	0	1	Supratentorial, Frontal Lobe	0	Seizures	7.50692	0	7.13074	0	7.57324	1	6.89997	1	8.28609	1	6.51788	0	4.96329	0	5.83615	0	0	0	8.3191	1	8.52751	0	3.7338	0	4.42052	0	2.76318
41	Oligoastrocytoma	2	TCGA-DB-A64O	1	25.46	1	14.13	0	#NULL!	0	59	0	2	80	1	1	#NULL!	0	0	Supratentorial, Temporal Lobe	0	Motor/Movement Changes	7.60685	0	7.75834	1	6.48539	0	5.99454	0	8.4938	1	6.45223	0	5.73238	1	6.17769	0	0.941764	1	8.36438	1	9.09965	1	3.01041	0	5.59104	1	3.37285
42	Oligodendroglioma	4	TCGA-DB-A64P	0	30.09	0	30.09	1	#NULL!	0	40	1	1	80	0	1	#NULL!	1	1	Supratentorial, Frontal Lobe	0	Seizures	7.99029	0	7.10075	0	7.265	0	6.49326	0	8.07597	0	6.58223	0	5.37898	1	6.19047	0	0	0	8.35684	1	8.92009	1	4.00583	0	4.93262	0	1.65102
43	Oligoastrocytoma	2	TCGA-DB-A64Q	0	5.98	0	5.98	0	#NULL!	1	31	0	2	90	0	1	#NULL!	1	1	Supratentorial, Frontal Lobe	0	Seizures	7.89614	0	6.99524	0	7.0354	0	7.25225	1	7.97466	0	6.5953	0	5.44398	1	6.05374	0	0	0	8.47081	1	8.69705	0	3.79517	0	4.92741	0	1.90856
44	Oligodendroglioma	1	TCGA-DB-A64R	0	31.37	0	31.37	0	#NULL!	1	24	0	1	90	0	0	#NULL!	0	1	Supratentorial, Frontal Lobe	0	Seizures	8.08299	1	7.15126	0	7.49281	1	7.18146	1	8.31242	1	6.89707	1	5.28205	1	6.09115	0	0	0	8.40036	1	8.84001	1	4.35716	1	5.45136	1	2.49679
45	Oligoastrocytoma	2	TCGA-DB-A64S	0	27.43	0	27.43	0	#NULL!	0	20	0	2	100	0	#NULL!	#NULL!	0	#NULL!	Supratentorial, Frontal Lobe	0	[Not Available]	8.15898	1	7.63356	1	6.69064	0	6.53848	0	8.00686	0	6.60922	0	5.31197	1	6.46431	1	0.9062	1	8.42841	1	8.8277	0	3.49519	0	4.79547	0	0.399849
46	Oligoastrocytoma	2	TCGA-DB-A64U	0	27.79	0	27.79	0	#NULL!	1	38	0	2	90	0	0	#NULL!	0	#NULL!	Supratentorial, Frontal Lobe	0	[Not Available]	7.90352	0	7.13116	0	7.25779	0	6.89409	1	8.3027	1	6.64998	0	5.26217	1	6.11995	0	0.324689	1	8.40808	1	8.87076	1	4.00189	0	5.36545	1	1.40332
47	Oligodendroglioma	1	TCGA-DB-A64V	0	29.2	0	29.2	0	#NULL!	0	54	0	1	90	0	1	#NULL!	1	#NULL!	Supratentorial, Frontal Lobe	0	Seizures	8.01483	0	7.28467	0	6.46792	0	6.61616	0	7.68803	0	6.87822	1	4.82679	0	6.3881	1	0	0	8.18437	0	8.49109	0	2.60399	0	5.09556	1	4.25553
48	Oligoastrocytoma	2	TCGA-DB-A64W	1	14.39	1	14.39	0	#NULL!	1	65	1	2	90	1	0	#NULL!	1	1	Supratentorial, Frontal Lobe	0	Seizures	8.08699	1	7.25697	0	7.67744	1	6.96163	1	8.26181	0	6.74839	1	4.99832	0	5.6428	0	0.367417	1	8.48114	1	9.03474	1	4.07289	0	5.0208	1	2.56413
49	Astrocytoma	3	TCGA-DB-A64X	0	18.5	0	18.5	1	#NULL!	1	56	1	0	90	1	0	#NULL!	1	1	Supratentorial, Frontal Lobe	0	Motor/Movement Changes	8.21155	1	7.64974	1	6.72827	0	6.97992	1	7.86324	0	7.11527	1	5.29466	1	6.56991	1	0	0	8.29177	0	8.74233	0	2.40577	0	4.72261	0	1.61637
50	Oligoastrocytoma	2	TCGA-DB-A75K	0	12.09	0	12.09	0	#NULL!	1	55	1	2	80	1	0	#NULL!	1	1	Supratentorial, Frontal Lobe	0	Seizures	8.23674	1	7.67839	1	6.96459	0	6.60612	0	7.61634	0	6.98224	1	4.83868	0	6.09668	0	0	0	7.9587	0	8.54318	0	4.609	1	4.42476	0	4.89615
51	Astrocytoma	3	TCGA-DB-A75L	0	11.24	0	11.24	1	#NULL!	1	36	1	0	90	1	1	#NULL!	1	1	Supratentorial, Frontal Lobe	0	Seizures	8.08042	1	7.4564	0	7.37304	1	6.7246	1	8.27568	0	6.67273	0	5.21128	0	6.16467	0	0	0	8.31746	1	8.70571	0	4.22573	1	4.06133	0	1.09688
52	Astrocytoma	0	TCGA-DB-A75M	0	17.87	0	17.87	0	#NULL!	0	47	0	0	80	1	0	#NULL!	1	1	Supratentorial, Parietal Lobe	0	Seizures	8.34579	1	7.96908	1	6.889	0	6.82682	1	7.69111	0	7.04139	1	5.96778	1	6.81469	1	0	0	8.16442	0	8.82838	0	3.93748	0	4.69267	0	4.16884
53	Astrocytoma	3	TCGA-DB-A75O	0	30.72	0	30.72	1	#NULL!	0	29	1	0	90	#NULL!	1	#NULL!	#NULL!	#NULL!	Supratentorial, Frontal Lobe	0	Seizures	8.3334	1	7.89931	1	6.79992	0	6.5242	0	8.04955	0	7.14924	1	5.75194	1	6.84135	1	0.776109	1	7.93017	0	9.02289	1	3.43114	0	6.05907	1	2.89086
54	Astrocytoma	0	TCGA-DB-A75P	0	16.16	0	16.16	0	#NULL!	1	25	0	0	100	0	0	#NULL!	0	0	Supratentorial, Temporal Lobe	0	Seizures	8.31504	1	8.5734	1	7.17242	0	6.10069	0	8.37008	1	6.8844	1	5.07942	0	6.35445	1	0	0	7.98154	0	8.68772	0	2.87212	0	5.20202	1	3.04054
55	Oligoastrocytoma	2	TCGA-DH-5140	1	19.94	1	19.94	0	#NULL!	1	38	1	2	90	1	1	#NULL!	#NULL!	#NULL!	Supratentorial, Temporal Lobe	0	Headaches	7.63453	0	7.99922	1	7.47798	1	7.44662	1	8.09342	0	7.01259	1	5.47303	1	6.47096	1	1.07987	1	8.0651	0	9.02546	1	4.83435	1	5.31739	1	5.17039
56	Oligodendroglioma	4	TCGA-DH-5141	0	31.8	0	31.8	1	#NULL!	0	32	1	1	80	1	1	#NULL!	#NULL!	#NULL!	Supratentorial, Frontal Lobe	0	Headaches	8.06721	1	7.10722	0	6.88605	0	6.61191	0	7.93605	0	6.60877	0	5.00963	0	6.50512	1	0	0	8.33726	1	9.01262	1	4.22976	1	5.19938	1	2.50826
57	Astrocytoma	3	TCGA-DH-5142	0	63.83	1	53.45	1	#NULL!	0	29	1	0	90	1	1	#NULL!	#NULL!	#NULL!	Supratentorial, Frontal Lobe	0	Seizures	8.08881	1	7.05819	0	7.02941	0	7.00357	1	8.47539	1	6.81081	1	4.79058	0	6.85705	1	0	0	8.42431	1	9.11004	1	4.42189	1	5.20497	1	2.23367
58	Oligoastrocytoma	2	TCGA-DH-5143	0	46.02	0	46.02	0	#NULL!	0	30	1	2	80	1	1	#NULL!	#NULL!	#NULL!	Supratentorial, Temporal Lobe	0	Seizures	7.9676	0	7.37737	0	7.25359	0	6.41126	0	8.47353	1	6.48396	0	5.35183	1	6.69212	1	0	0	8.28742	0	9.03514	1	4.37596	1	4.91794	0	2.53294
59	Oligodendroglioma	4	TCGA-DH-5144	0	24.57	0	24.57	1	#NULL!	1	56	1	1	100	1	0	#NULL!	#NULL!	#NULL!	Supratentorial, Frontal Lobe	0	Seizures	8.02687	1	6.93746	0	7.73436	1	6.59901	0	8.31188	1	6.84875	1	4.85194	0	6.24357	0	0	0	8.4493	1	8.94844	1	4.55832	1	5.39483	1	0.490847
60	Oligodendroglioma	4	TCGA-DH-A669	1	30.19	1	8.54	1	#NULL!	0	70	1	1	#NULL!	0	1	#NULL!	0	#NULL!	Supratentorial, Parietal Lobe	0	Mental Status Changes	8.33426	1	7.29195	0	7.14018	0	6.86346	1	7.78784	0	6.7469	1	4.95675	0	6.02089	0	0.242632	1	8.49402	1	8.69189	0	1.5778	0	6.03639	1	4.16132
61	Astrocytoma	3	TCGA-DH-A66B	0	42.02	0	42.02	1	#NULL!	0	52	1	0	90	1	1	#NULL!	1	#NULL!	Supratentorial, Temporal Lobe	0	Mental Status Changes	8.18084	1	7.30616	0	7.02929	0	5.6832	0	8.14503	0	7.00421	1	4.69717	0	6.47047	1	0	0	8.53033	1	8.86757	1	3.30674	0	4.2526	0	2.54059
62	Astrocytoma	3	TCGA-DH-A66D	0	27.79	0	27.79	1	#NULL!	1	43	1	0	80	1	0	#NULL!	1	1	Supratentorial, Frontal Lobe	0	Seizures	8.2694	1	7.64479	1	7.44769	1	7.01554	1	8.25617	0	7.0067	1	5.23541	1	6.43231	1	0.326278	1	8.3424	1	8.44153	0	4.50967	1	5.01523	1	2.3651
63	Oligodendroglioma	1	TCGA-DH-A66F	0	17.18	0	17.18	0	#NULL!	0	49	0	1	90	0	1	#NULL!	0	1	Supratentorial, Frontal Lobe	0	Seizures	7.95243	0	7.214	0	7.11135	0	6.76536	1	8.19802	0	6.6044	0	5.75903	1	6.28246	0	0	0	8.31664	1	8.69391	0	4.07308	0	4.92903	0	3.12544
64	Oligodendroglioma	4	TCGA-DH-A66G	0	17.18	0	17.18	1	#NULL!	1	49	1	1	80	1	1	#NULL!	1	1	Supratentorial, Frontal Lobe	0	Headaches	7.86135	0	7.29128	0	7.4645	1	7.20076	1	8.69274	1	6.32794	0	4.93267	0	6.05025	0	0.361165	1	8.20675	0	8.84811	1	4.41623	1	4.67418	0	3.42039
65	Oligodendroglioma	4	TCGA-DH-A7UR	0	54.2	0	54.2	1	#NULL!	1	59	1	1	90	1	0	#NULL!	1	#NULL!	Supratentorial, Frontal Lobe	0	Headaches	8.33378	1	7.55411	1	7.26288	0	6.31483	0	7.95913	0	7.14953	1	5.28149	1	6.21047	0	0.332823	1	8.29548	0	8.83725	1	4.33643	1	4.48945	0	2.52199
66	Oligodendroglioma	1	TCGA-DH-A7US	0	23.19	0	23.19	0	#NULL!	0	50	0	1	80	0	0	#NULL!	0	1	Supratentorial, Temporal Lobe	0	Seizures	8.08926	1	7.4216	0	7.00551	0	7.17386	1	8.17806	0	6.94011	1	5.47156	1	6.48776	1	0	0	8.09395	0	8.64615	0	4.31008	1	5.6212	1	1.10453
67	Astrocytoma	3	TCGA-DH-A7UT	1	17.44	1	13.37	1	#NULL!	0	30	1	0	80	1	1	#NULL!	1	1	Supratentorial, Frontal Lobe	0	Seizures	8.06048	1	7.96303	1	6.56748	0	7.11926	1	7.86729	0	6.95169	1	5.27785	1	6.51488	1	0.767976	1	8.17628	0	8.77619	0	3.05492	0	4.91399	0	1.35802
68	Astrocytoma	3	TCGA-DH-A7UU	0	13.7	0	13.7	1	#NULL!	0	43	1	0	90	1	0	#NULL!	1	1	Supratentorial, Frontal Lobe	0	Sensory Changes	8.20814	1	7.89788	1	7.52187	1	7.17948	1	8.06137	0	7.05623	1	5.78294	1	6.37474	1	0.360886	1	7.78375	0	9.10218	1	4.87477	1	4.66095	0	0.625511
69	Astrocytoma	3	TCGA-DH-A7UV	0	18.59	0	18.59	1	#NULL!	0	49	1	0	90	1	0	#NULL!	1	0	Supratentorial, Temporal Lobe	0	Headaches	8.14733	1	8.06551	1	7.27268	0	7.10271	1	7.86154	0	6.39198	0	5.79795	1	6.52989	1	0	0	8.2436	0	8.92471	1	4.3662	1	4.95855	0	1.06661
70	Astrocytoma	3	TCGA-DU-5847	0	18	0	18	1	#NULL!	1	34	1	0	80	1	0	#NULL!	#NULL!	#NULL!	Supratentorial, Frontal Lobe	0	Seizures	7.84421	0	7.83168	1	6.79181	0	6.00368	0	8.95164	1	7.06044	1	6.08477	1	6.54133	1	0.262057	1	8.39318	1	9.25262	1	3.54257	0	6.45356	1	4.67058
71	Oligodendroglioma	1	TCGA-DU-5849	0	14.55	0	14.55	0	#NULL!	0	48	0	1	80	0	1	#NULL!	#NULL!	#NULL!	Supratentorial, Frontal Lobe	0	Seizures	8.01098	0	7.22506	0	7.3884	1	6.67056	1	8.35137	1	6.91966	1	5.36815	1	6.17713	0	0.26559	1	8.14723	0	8.70512	0	4.50811	1	5.49378	1	2.7278
72	Oligoastrocytoma	2	TCGA-DU-5851	0	17.44	0	17.44	0	#NULL!	1	40	1	2	90	1	0	#NULL!	#NULL!	#NULL!	Supratentorial, Temporal Lobe	0	Seizures	7.82215	0	7.21671	0	7.59819	1	6.71667	1	8.70663	1	6.50429	0	5.14764	0	6.06547	0	0	0	8.12869	0	8.90569	1	4.2116	1	5.37487	1	2.24437
73	Oligoastrocytoma	2	TCGA-DU-5852	1	6.73	1	0.79	0	#NULL!	1	61	1	2	80	0	1	#NULL!	#NULL!	#NULL!	Supratentorial, Temporal Lobe	0	Seizures	8.11469	1	8.20007	1	7.2612	0	6.43078	0	8.52661	1	6.85657	1	5.29192	1	5.86259	0	1.3371	1	8.36785	1	9.10032	1	3.61504	0	4.89806	0	3.12509
74	Oligoastrocytoma	2	TCGA-DU-5853	0	13.37	0	13.37	0	#NULL!	0	29	0	2	100	1	1	#NULL!	#NULL!	#NULL!	Supratentorial, Frontal Lobe	0	Seizures	8.11285	1	7.48769	0	7.5295	1	6.83309	1	8.58132	1	6.66232	0	5.50219	1	6.08501	0	0	0	8.4098	1	9.01826	1	4.49934	1	4.77127	0	2.32653
75	Astrocytoma	3	TCGA-DU-5854	0	8.44	1	6.64	1	#NULL!	1	57	1	0	90	1	0	#NULL!	#NULL!	#NULL!	Supratentorial, Frontal Lobe	0	Motor/Movement Changes	8.00401	0	7.90296	1	6.9461	0	5.74569	0	8.23068	0	6.59743	0	4.90551	0	6.31076	1	0	0	8.30121	0	8.77781	0	2.51764	0	5.06456	1	5.24221
76	Oligoastrocytoma	2	TCGA-DU-5855	0	6.8	0	6.8	0	#NULL!	1	49	1	2	100	1	0	#NULL!	#NULL!	#NULL!	Supratentorial, Frontal Lobe	0	Headaches	7.90109	0	7.59409	1	7.62898	1	6.14179	0	8.31966	1	6.82174	1	4.95204	0	6.45437	1	0	0	8.42102	1	8.66617	0	4.58132	1	4.01197	0	4.57084
77	Oligodendroglioma	1	TCGA-DU-5870	0	182.19	1	142.81	0	#NULL!	1	34	0	1	70	1	0	#NULL!	#NULL!	#NULL!	Supratentorial, Temporal Lobe	0	Headaches	8.02119	0	7.1867	0	7.22712	0	7.12052	1	8.60344	1	6.62352	0	5.76774	1	6.20522	0	0.309982	1	8.29811	0	8.9792	1	4.97368	1	4.60007	0	2.06753
78	Oligoastrocytoma	2	TCGA-DU-5871	0	18.92	0	18.92	0	#NULL!	1	37	0	2	100	1	1	#NULL!	#NULL!	#NULL!	Supratentorial, Frontal Lobe	0	Seizures	7.99656	0	7.65837	1	7.46899	1	5.99079	0	8.48622	1	6.86852	1	5.32264	1	6.30478	1	0	0	8.32742	1	8.91646	1	4.69958	1	4.31275	0	0.578578
79	Oligoastrocytoma	2	TCGA-DU-5872	0	17.48	1	8.71	0	#NULL!	1	43	0	2	100	1	1	#NULL!	#NULL!	#NULL!	Supratentorial, Frontal Lobe	0	Headaches	7.46228	0	7.39893	0	7.35952	1	5.58433	0	8.3442	1	6.81431	1	5.13745	0	6.53391	1	0	0	8.44839	1	8.94044	1	4.40908	1	4.19317	0	3.28379
80	Oligodendroglioma	1	TCGA-DU-5874	0	15.14	0	15.14	0	#NULL!	1	62	0	1	100	0	1	#NULL!	#NULL!	#NULL!	Supratentorial, Frontal Lobe	0	Seizures	8.37968	1	7.46423	0	7.78207	1	6.47107	0	8.49568	1	7.20552	1	5.22186	0	5.94082	0	0.255495	1	8.38248	1	8.9459	1	5.15022	1	5.3248	1	3.80576
81	Astrocytoma	3	TCGA-DU-6392	0	211.01	1	31.21	1	#NULL!	1	35	1	0	80	1	0	#NULL!	#NULL!	#NULL!	Supratentorial, Parietal Lobe	0	Seizures	8.30711	1	7.54192	1	6.92251	0	6.67061	1	8.18747	0	7.21433	1	4.29185	0	5.92944	0	0	0	8.51445	1	8.96487	1	4.52608	1	6.22221	1	4.04288
82	Oligodendroglioma	4	TCGA-DU-6393	1	52.07	1	52.07	1	#NULL!	0	66	1	1	80	1	1	#NULL!	#NULL!	#NULL!	Supratentorial, Occipital Lobe	0	[Not Available]	8.09761	1	7.53825	1	7.83511	1	6.52311	0	8.28313	0	7.02498	1	4.8152	0	5.91117	0	0	0	8.38764	1	8.95242	1	4.95811	1	5.05163	1	4.95083
83	Oligodendroglioma	4	TCGA-DU-6394	1	22.4	1	11.6	1	#NULL!	0	53	1	1	80	1	#NULL!	#NULL!	#NULL!	#NULL!	Supratentorial, Frontal Lobe	0	[Not Available]	8.09035	1	7.46936	0	7.46393	1	6.25284	0	8.78884	1	6.92401	1	4.97202	0	5.78489	0	0	0	8.56377	1	8.87663	1	4.93227	1	4.57678	0	6.54849
84	Oligoastrocytoma	2	TCGA-DU-6395	1	48.98	1	39.32	0	#NULL!	0	31	0	2	80	1	1	#NULL!	#NULL!	#NULL!	Supratentorial, Frontal Lobe	0	Seizures	8.23675	1	7.6518	1	6.84346	0	6.75289	1	8.12445	0	6.91951	1	5.25481	1	6.58967	1	0.53004	1	8.38994	1	8.92248	1	4.39063	1	5.86242	1	0.874677
85	Oligoastrocytoma	2	TCGA-DU-6396	1	75.1	1	3.48	0	#NULL!	1	31	1	2	90	1	0	#NULL!	#NULL!	#NULL!	Supratentorial, Frontal Lobe	0	Motor/Movement Changes	7.69673	0	7.77228	1	7.43027	1	6.64321	0	8.52259	1	6.57368	0	4.65365	0	5.94109	0	0	0	8.64728	1	8.70422	0	5.01518	1	4.55267	0	3.73995
86	Oligodendroglioma	1	TCGA-DU-6397	1	46.02	1	27.5	0	#NULL!	0	45	1	1	80	1	0	#NULL!	#NULL!	#NULL!	Supratentorial, Temporal Lobe	0	Headaches	7.86197	0	7.04989	0	7.53247	1	6.83782	1	8.43676	1	6.82443	1	5.28931	1	6.22648	0	0.319544	1	8.18114	0	8.86161	1	5.01128	1	4.38755	0	2.1436
87	Oligodendroglioma	1	TCGA-DU-6399	1	65.7	1	53.52	0	#NULL!	0	54	0	1	60	1	0	#NULL!	#NULL!	#NULL!	Supratentorial, Temporal Lobe	0	[Not Available]	8.13419	1	7.5454	1	7.47541	1	6.75059	1	8.38885	1	6.82517	1	5.35938	1	6.36439	1	0	0	8.30106	0	9.08477	1	4.84595	1	4.988	0	2.20116
88	Oligodendroglioma	1	TCGA-DU-6400	1	1.22	1	1.22	0	#NULL!	1	66	0	1	80	0	1	#NULL!	#NULL!	#NULL!	Supratentorial, Temporal Lobe	0	Mental Status Changes	8.24815	1	7.35604	0	7.7043	1	6.84797	1	8.13738	0	7.13999	1	4.93818	0	6.00421	0	0	0	8.18667	0	8.82681	0	4.53852	1	5.20699	1	2.40977
89	Oligodendroglioma	1	TCGA-DU-6401	1	87.39	1	61.96	0	#NULL!	1	31	0	1	80	1	1	#NULL!	#NULL!	#NULL!	Supratentorial, Frontal Lobe	0	Headaches	8.11651	1	7.45913	0	7.76559	1	5.60078	0	7.98675	0	6.69831	0	5.23169	1	6.14916	0	0	0	8.36271	1	8.96687	1	4.98031	1	4.78724	0	0
90	Astrocytoma	3	TCGA-DU-6402	1	7.03	1	3.38	1	#NULL!	0	52	1	0	80	1	0	#NULL!	#NULL!	#NULL!	Supratentorial, Frontal Lobe	0	Seizures	8.50463	1	7.98049	1	6.62225	0	5.94155	0	7.61372	0	6.90736	1	4.54136	0	6.49377	1	0.278238	1	8.56556	1	8.98736	1	1.75989	0	4.91302	0	5.49912
91	Oligoastrocytoma	2	TCGA-DU-6403	1	11.63	1	11.63	0	#NULL!	1	60	1	2	90	1	0	#NULL!	#NULL!	#NULL!	Supratentorial, Temporal Lobe	0	Headaches	8.37204	1	7.72936	1	7.37817	1	6.26195	0	8.21267	0	6.75678	1	4.94254	0	6.21363	0	0.300401	1	8.20762	0	8.97883	1	4.49987	1	5.99265	1	1.57993
92	Oligodendroglioma	1	TCGA-DU-6404	1	133.64	1	37.91	0	#NULL!	1	24	1	1	100	1	0	#NULL!	#NULL!	#NULL!	Supratentorial, Frontal Lobe	0	Seizures	8.64299	1	7.69365	1	6.46904	0	7.3129	1	8.37716	1	6.80028	1	5.60452	1	6.86935	1	0.439351	1	8.21064	0	9.30596	1	3.8805	0	4.98431	0	1.39488
93	Astrocytoma	3	TCGA-DU-6405	1	19.88	1	15.97	1	#NULL!	1	51	1	0	90	1	0	#NULL!	#NULL!	#NULL!	Supratentorial, Frontal Lobe	0	Seizures	8.20463	1	7.68438	1	6.85312	0	6.14028	0	8.82957	1	6.74138	1	4.74399	0	6.69786	1	0.707297	1	8.41422	1	9.16539	1	4.33175	1	5.86473	1	0.99846
94	Oligoastrocytoma	2	TCGA-DU-6406	1	16.82	1	16.82	0	#NULL!	1	59	1	2	60	1	1	#NULL!	#NULL!	#NULL!	Supratentorial, Frontal Lobe	0	Motor/Movement Changes	8.43515	1	8.57382	1	6.74425	0	6.05123	0	8.32418	1	6.97955	1	4.83883	0	6.37671	1	0.65928	1	8.63157	1	9.08782	1	3.83787	0	5.23641	1	0.65928
95	Oligodendroglioma	1	TCGA-DU-6407	1	94.45	1	78.75	0	#NULL!	1	35	0	1	90	1	0	#NULL!	#NULL!	#NULL!	[Discrepancy]	0	Seizures	8.31902	1	7.36127	0	7.26909	0	6.64323	0	8.28156	0	6.833	1	5.25047	1	6.53494	1	0.57953	1	8.43606	1	9.06445	1	4.72299	1	4.78718	0	2.38098
96	Oligodendroglioma	4	TCGA-DU-6408	1	113.99	1	68.89	1	#NULL!	1	23	1	1	90	1	0	#NULL!	#NULL!	#NULL!	Supratentorial, Frontal Lobe	0	Motor/Movement Changes	8.18663	1	7.05539	0	7.27097	0	7.35694	1	8.26637	0	7.0309	1	5.33931	1	6.54774	1	0.582216	1	8.21844	0	9.05908	1	4.76661	1	4.48511	0	1.09021
97	Oligodendroglioma	4	TCGA-DU-6410	0	7.95	0	7.95	1	#NULL!	0	56	1	1	50	0	#NULL!	#NULL!	#NULL!	#NULL!	Supratentorial, Frontal Lobe	0	Mental Status Changes	8.15035	1	6.92164	0	7.58078	1	6.17408	0	8.84321	1	6.89721	1	4.83082	0	5.8391	0	0	0	8.51853	1	8.81865	0	5.08795	1	5.9919	1	2.58298
98	Oligoastrocytoma	2	TCGA-DU-6542	0	2.4	0	2.4	0	#NULL!	0	25	1	2	80	1	0	#NULL!	#NULL!	#NULL!	Supratentorial, Temporal Lobe	0	Visual Changes	7.64826	0	7.72879	1	7.13909	0	5.72805	0	8.67059	1	6.70142	0	4.56526	0	6.2068	0	0	0	8.5069	1	8.86306	1	4.88736	1	4.32884	0	2.68672
99	Astrocytoma	3	TCGA-DU-7006	1	11.47	1	11.47	1	#NULL!	1	60	1	0	#NULL!	1	1	#NULL!	#NULL!	#NULL!	Supratentorial, Temporal Lobe	0	Seizures	8.27034	1	7.74531	1	7.04699	0	6.26686	0	8.24467	0	6.29588	0	4.21485	0	6.3526	1	0.252314	1	8.75793	1	9.11455	1	3.59981	0	5.61299	1	7.51563
100	Astrocytoma	0	TCGA-DU-7007	1	62.91	1	62.91	0	#NULL!	0	33	0	0	#NULL!	#NULL!	0	#NULL!	#NULL!	#NULL!	Supratentorial, Frontal Lobe	0	Headaches	7.77617	0	7.73928	1	7.64427	1	6.62134	0	8.12871	0	6.77176	1	5.0291	0	6.53958	1	1.98898	1	8.35147	1	9.17715	1	4.00946	0	5.06493	1	4.33117
101	Oligodendroglioma	1	TCGA-DU-7008	0	156.11	1	10.84	0	#NULL!	1	41	0	1	#NULL!	0	0	#NULL!	#NULL!	#NULL!	Supratentorial, Frontal Lobe	0	Seizures	8.17924	1	7.80533	1	7.39857	1	6.81052	1	8.19576	0	7.03941	1	5.40509	1	6.26848	0	0.232381	1	8.47042	1	8.88682	1	4.46983	1	5.05586	1	3.27258
102	Oligodendroglioma	1	TCGA-DU-7009	1	154.24	1	97.24	0	#NULL!	1	32	0	1	80	1	1	#NULL!	#NULL!	#NULL!	Supratentorial, Frontal Lobe	0	Sensory Changes	7.90697	0	6.93219	0	7.60604	1	6.34871	0	8.86622	1	6.76779	1	5.16912	0	6.14197	0	0.262749	1	8.36385	1	8.75793	0	5.34775	1	5.73526	1	1.70606
103	Astrocytoma	3	TCGA-DU-7010	1	14.98	1	6.34	1	#NULL!	1	58	1	0	60	1	1	#NULL!	#NULL!	#NULL!	Supratentorial, Frontal Lobe	0	Seizures	7.82119	0	7.54947	1	7.35133	1	7.12145	1	8.40621	1	6.86726	1	5.34073	1	6.61989	1	3.52197	1	8.2512	0	9.01221	1	3.84611	0	5.18468	1	0.919047
104	Oligoastrocytoma	2	TCGA-DU-7011	1	105.12	1	6	0	#NULL!	0	25	0	2	80	1	0	#NULL!	#NULL!	#NULL!	Supratentorial, Frontal Lobe	0	Seizures	7.94063	0	7.28013	0	7.42991	1	6.50367	0	8.66927	1	6.21551	0	5.20081	0	6.39585	1	0.319471	1	8.37794	1	8.93685	1	4.41034	1	5.23475	1	1.56105
105	Astrocytoma	3	TCGA-DU-7012	1	6.54	1	6.54	1	#NULL!	1	74	1	0	80	1	1	#NULL!	#NULL!	#NULL!	Supratentorial, Temporal Lobe	0	Mental Status Changes	7.46922	0	7.59441	1	6.70076	0	6.32303	0	8.96973	1	6.46663	0	5.78343	1	6.75552	1	4.87664	1	8.45753	1	9.51439	1	3.69361	0	5.26422	1	4.64397
106	Astrocytoma	3	TCGA-DU-7013	1	8.84	1	6.14	1	#NULL!	0	59	1	0	80	1	1	#NULL!	#NULL!	#NULL!	Supratentorial, Temporal Lobe	0	Seizures	7.87518	0	7.62415	1	7.39132	1	6.75055	1	8.32818	1	6.39233	0	5.30146	1	6.32524	1	3.09459	1	8.44562	1	9.05067	1	4.55646	1	5.21054	1	0.793626
107	Oligodendroglioma	1	TCGA-DU-7014	1	117.31	1	112.91	0	#NULL!	0	59	0	1	100	1	0	#NULL!	#NULL!	#NULL!	Supratentorial, Frontal Lobe	0	Seizures	7.99885	0	7.52981	1	7.45548	1	6.13107	0	8.00737	0	6.78188	1	4.91588	0	6.18386	0	0	0	8.34525	1	8.62675	0	4.32877	1	3.86343	0	2.00715
108	Oligodendroglioma	1	TCGA-DU-7015	0	90.7	1	19.42	0	#NULL!	1	41	0	1	90	0	0	#NULL!	#NULL!	#NULL!	Supratentorial, Temporal Lobe	0	Seizures	7.91077	0	7.31418	0	7.24709	0	7.03268	1	8.49875	1	6.55001	0	5.1862	0	6.33405	1	0.465117	1	8.48569	1	9.33372	1	5.23881	1	5.64092	1	3.43102
109	Oligodendroglioma	4	TCGA-DU-7018	1	30.65	1	11.1	1	#NULL!	1	57	1	1	90	0	0	#NULL!	#NULL!	#NULL!	Supratentorial, Frontal Lobe	0	Seizures	8.17131	1	7.28639	0	7.63274	1	6.51434	0	8.34636	1	6.98995	1	4.76341	0	5.92614	0	0	0	8.32285	1	8.77871	0	4.53964	1	4.33303	0	4.0018
110	Oligoastrocytoma	2	TCGA-DU-7019	0	26.28	0	26.28	0	#NULL!	0	39	0	2	100	1	0	#NULL!	#NULL!	#NULL!	Supratentorial, Temporal Lobe	0	Headaches	7.88243	0	7.3669	0	7.47104	1	6.43969	0	8.46684	1	6.36711	0	5.33163	1	6.27452	0	0	0	8.56516	1	8.85568	1	4.3804	1	4.6331	0	1.09751
111	Astrocytoma	3	TCGA-DU-7290	1	10.35	1	10.35	1	#NULL!	1	45	1	0	#NULL!	0	0	#NULL!	#NULL!	#NULL!	Supratentorial, Temporal Lobe	0	Headaches	7.49273	0	7.37647	0	7.20475	0	6.95172	1	8.38106	1	6.32519	0	5.02505	0	6.52223	1	3.17354	1	8.64908	1	9.19695	1	4.02198	0	4.76278	0	0.828421
112	Astrocytoma	3	TCGA-DU-7292	1	7.95	1	2.99	1	#NULL!	0	69	1	0	80	1	1	#NULL!	#NULL!	#NULL!	Supratentorial, Temporal Lobe	0	Seizures	8.11531	1	7.53406	1	7.48184	1	6.72868	1	8.59809	1	6.58005	0	4.82089	0	6.11107	0	0.493964	1	8.22077	0	8.90168	1	3.4849	0	5.96863	1	2.5508
113	Oligodendroglioma	1	TCGA-DU-7294	0	94.25	0	94.25	0	#NULL!	1	53	0	1	100	0	0	#NULL!	#NULL!	#NULL!	Supratentorial, Frontal Lobe	0	[Not Available]	8.00132	0	6.99777	0	7.77436	1	6.90987	1	8.53335	1	6.4164	0	4.98626	0	6.03367	0	0.289081	1	8.41611	1	9.11495	1	4.29606	1	5.11763	1	3.84859
114	Astrocytoma	3	TCGA-DU-7298	1	18.92	1	6.57	1	#NULL!	1	38	1	0	80	1	1	#NULL!	#NULL!	#NULL!	Supratentorial, Temporal Lobe	0	Headaches	7.51747	0	6.98507	0	7.52568	1	6.0387	0	8.53268	1	6.69391	0	4.75315	0	5.91034	0	0	0	8.33213	1	8.82116	0	4.60358	1	4.66859	0	4.16762
115	Astrocytoma	3	TCGA-DU-7299	1	43.99	1	22.17	1	#NULL!	0	33	1	0	90	1	1	#NULL!	#NULL!	#NULL!	Supratentorial, Parietal Lobe	0	Seizures	8.11819	1	8.07097	1	7.64423	1	6.26584	0	8.56787	1	6.6309	0	5.11596	0	6.09824	0	0.237204	1	8.31457	0	8.94585	1	3.83401	0	4.64515	0	0.849595
116	Oligodendroglioma	4	TCGA-DU-7300	1	61.96	1	10.41	1	#NULL!	1	53	1	1	90	0	0	#NULL!	#NULL!	#NULL!	Supratentorial, Frontal Lobe	0	Seizures	7.90654	0	7.0895	0	7.64009	1	6.49926	0	8.55965	1	6.30089	0	5.10128	0	6.00069	0	0	0	8.37575	1	8.86185	1	4.16727	1	6.04331	1	2.97207
117	Oligodendroglioma	1	TCGA-DU-7301	1	25.89	1	12.02	0	#NULL!	0	53	0	1	100	1	1	#NULL!	#NULL!	#NULL!	Supratentorial, Temporal Lobe	0	Seizures	8.06345	1	7.45166	0	7.36963	1	6.81041	1	8.19672	0	6.50153	0	4.57088	0	6.26663	0	0.713391	1	8.62422	1	9.12716	1	4.83283	1	5.42444	1	5.80937
118	Oligodendroglioma	4	TCGA-DU-7302	0	60.25	1	45.14	1	#NULL!	1	48	1	1	90	0	1	#NULL!	#NULL!	#NULL!	Supratentorial, Frontal Lobe	0	Seizures	7.34055	0	7.10841	0	7.89596	1	7.06902	1	8.98698	1	6.29822	0	5.20088	0	5.92609	0	0.293266	1	8.308	0	9.02515	1	4.09941	0	5.0847	1	2.28865
119	Oligoastrocytoma	2	TCGA-DU-7304	1	23.29	1	10.15	0	#NULL!	0	43	1	2	80	1	1	#NULL!	#NULL!	#NULL!	Supratentorial, Frontal Lobe	0	Seizures	7.93917	0	7.38667	0	7.66719	1	6.49197	0	8.68017	1	6.49246	0	5.52253	1	6.28314	0	0.301955	1	8.19471	0	8.82794	0	4.3592	1	4.71564	0	2.59054
120	Oligoastrocytoma	2	TCGA-DU-7306	0	41.95	1	41.06	0	#NULL!	0	67	0	2	100	1	0	#NULL!	#NULL!	#NULL!	Supratentorial, Temporal Lobe	0	Seizures	8.0439	1	7.38214	0	7.44132	1	6.76687	1	8.28506	1	6.57504	0	4.67687	0	6.33607	1	0	0	8.56574	1	8.62645	0	4.36142	1	4.04522	0	1.42811
121	Oligodendroglioma	4	TCGA-DU-7309	0	2.76	0	2.76	1	#NULL!	1	41	1	1	90	1	1	#NULL!	#NULL!	#NULL!	Supratentorial, Frontal Lobe	0	Seizures	7.98643	0	7.32472	0	7.72053	1	6.61663	0	8.84945	1	6.48848	0	5.39617	1	6.06069	0	0	0	8.18866	0	8.93738	1	4.36146	1	5.23706	1	2.13367
122	Astrocytoma	3	TCGA-DU-8158	1	5.09	1	5.09	1	#NULL!	1	57	1	0	80	#NULL!	1	#NULL!	#NULL!	#NULL!	Supratentorial, Frontal Lobe	0	Mental Status Changes	7.59409	0	7.60467	1	6.75893	0	6.27666	0	8.71891	1	6.3705	0	5.52038	1	6.21729	0	1.43737	1	8.52125	1	9.42106	1	3.90559	0	4.47347	0	4.13116
123	Oligoastrocytoma	2	TCGA-DU-8161	1	23.72	1	3.65	0	#NULL!	1	63	1	2	70	1	1	#NULL!	#NULL!	#NULL!	Supratentorial, Not Otherwise Specified	0	Sensory Changes	7.82287	0	7.92071	1	6.37907	0	6.29079	0	8.81421	1	6.4119	0	4.96804	0	6.01233	0	0.264439	1	8.42959	1	9.17124	1	3.55244	0	4.9497	0	3.53494
124	Oligoastrocytoma	2	TCGA-DU-8162	1	14.59	1	13.21	0	#NULL!	1	61	1	2	80	1	0	#NULL!	#NULL!	#NULL!	Supratentorial, Temporal Lobe	0	Headaches	7.73367	0	7.63779	1	7.77652	1	6.80715	1	8.87613	1	6.15408	0	5.0665	0	5.65178	0	0.291101	1	8.23838	0	8.70044	0	4.15643	0	5.46592	1	2.78526
125	Oligoastrocytoma	2	TCGA-DU-8163	0	20.66	1	16.72	0	#NULL!	0	29	1	2	90	1	1	#NULL!	#NULL!	#NULL!	Supratentorial, Temporal Lobe	0	Seizures	7.99747	0	7.57744	1	7.54014	1	6.92056	1	8.61154	1	6.68321	0	5.34823	1	6.36186	1	0.797237	1	8.29986	0	9.00428	1	4.59878	1	5.14819	1	2.57975
126	Oligodendroglioma	1	TCGA-DU-8164	0	21.39	0	21.39	0	#NULL!	0	51	0	1	100	0	0	#NULL!	#NULL!	1	Supratentorial, Frontal Lobe	0	Seizures	7.95107	0	7.105	0	7.86644	1	6.9728	1	8.81468	1	6.4495	0	5.28986	1	6.03339	0	0	0	8.40859	1	8.85184	1	5.42694	1	5.25912	1	2.04034
127	Oligodendroglioma	1	TCGA-DU-8165	0	19.12	0	19.12	0	#NULL!	1	60	1	1	90	1	1	#NULL!	#NULL!	#NULL!	Supratentorial, Temporal Lobe	0	Seizures	7.67585	0	7.57131	1	7.65758	1	7.23306	1	7.84979	0	6.55315	0	4.95749	0	6.79747	1	1.38704	1	8.18307	0	9.27147	1	4.14213	0	5.3617	1	3.9377
128	Oligoastrocytoma	2	TCGA-DU-8166	0	16.95	1	6.34	0	#NULL!	1	29	0	2	80	1	1	#NULL!	#NULL!	#NULL!	Supratentorial, Frontal Lobe	0	Seizures	7.97489	0	7.42943	0	7.6431	1	7.22491	1	8.82292	1	6.8877	1	5.57251	1	6.13302	0	0.668803	1	8.37084	1	9.0532	1	5.2375	1	5.65794	1	2.15349
129	Oligoastrocytoma	2	TCGA-DU-8167	0	15.47	0	15.47	0	#NULL!	1	69	0	2	100	1	0	#NULL!	#NULL!	#NULL!	Supratentorial, Frontal Lobe	0	Seizures	8.08377	1	7.5489	1	6.92292	0	6.81604	1	8.08967	0	6.92702	1	4.98781	0	6.39814	1	0.348471	1	8.55985	1	8.65967	0	3.86474	0	4.8401	0	1.36563
130	Oligodendroglioma	4	TCGA-DU-8168	0	14.16	0	14.16	1	#NULL!	1	55	1	1	70	1	0	#NULL!	#NULL!	#NULL!	Supratentorial, Frontal Lobe	0	Headaches	7.97708	0	7.37953	0	7.73473	1	7.05395	1	8.56677	1	6.62658	0	5.0159	0	5.78764	0	0	0	8.52638	1	8.84825	1	4.97821	1	5.47847	1	3.57529
131	Astrocytoma	3	TCGA-DU-A5TP	0	33.25	1	6.67	1	#NULL!	0	33	1	0	70	1	0	#NULL!	1	#NULL!	Supratentorial, Parietal Lobe	0	Seizures	8.37555	1	7.30868	0	7.06907	0	6.42129	0	8.24034	0	7.1428	1	4.10111	0	5.89787	0	0	0	8.73239	1	8.62727	0	3.53372	0	5.75789	1	4.00326
132	Oligoastrocytoma	2	TCGA-DU-A5TR	0	29.83	1	27.86	0	#NULL!	0	51	0	2	90	0	1	#NULL!	1	#NULL!	Supratentorial, Temporal Lobe	0	Seizures	8.28273	1	7.70998	1	6.23198	0	6.96204	1	7.45584	0	6.65194	0	4.36583	0	6.83068	1	0	0	8.12469	0	8.4979	0	2.57985	0	4.99651	0	6.98497
133	Oligodendroglioma	1	TCGA-DU-A5TS	0	31.67	1	18.1	0	#NULL!	0	42	0	1	100	1	0	#NULL!	1	#NULL!	Supratentorial, Frontal Lobe	0	Headaches	8.32768	1	7.67587	1	6.56138	0	6.41335	0	8.07319	0	6.95194	1	5.12329	0	6.77635	1	0	0	8.21163	0	8.93392	1	3.1494	0	4.26362	0	1.6753
134	Oligodendroglioma	4	TCGA-DU-A5TT	0	24.41	1	19.19	1	#NULL!	0	70	1	1	60	1	1	#NULL!	1	0	Supratentorial, Frontal Lobe	0	Seizures	7.86705	0	7.74092	1	6.41136	0	6.81843	1	8.06843	0	6.45374	0	5.73865	1	6.49945	1	1.9526	1	8.37954	1	8.63177	0	2.97415	0	5.19435	1	2.1214
135	Astrocytoma	0	TCGA-DU-A5TU	0	26.15	1	6.11	0	#NULL!	1	62	0	0	50	1	1	#NULL!	0	#NULL!	Supratentorial, Frontal Lobe	0	Mental Status Changes	8.03053	1	7.75154	1	6.66375	0	7.23628	1	7.45768	0	7.04158	1	4.94024	0	6.49788	1	0.819604	1	8.31617	0	8.40483	0	2.83798	0	4.82827	0	2.37336
136	Astrocytoma	3	TCGA-DU-A5TW	0	24.97	0	24.97	1	#NULL!	1	33	1	0	100	0	0	#NULL!	0	1	Supratentorial, Frontal Lobe	0	Seizures	7.86876	0	7.75569	1	7.19957	0	6.95286	1	7.57107	0	6.8519	1	5.15491	0	6.35615	1	0.633663	1	8.26986	0	8.4645	0	4.03822	0	4.35043	0	1.16668
137	Astrocytoma	3	TCGA-DU-A5TY	1	33.94	1	17.28	1	#NULL!	1	46	1	0	60	1	1	#NULL!	1	0	Supratentorial, Parietal Lobe	0	Seizures	8.12155	1	7.70735	1	6.87323	0	6.68799	1	7.76956	0	6.61669	0	5.11774	0	6.02101	0	1.01244	1	8.37685	1	8.83318	1	3.76247	0	5.7445	1	2.55161
138	Oligodendroglioma	1	TCGA-DU-A6S2	0	25.53	0	25.53	0	#NULL!	1	37	0	1	70	0	0	#NULL!	0	1	Supratentorial, Frontal Lobe	0	Headaches	7.87428	0	7.23009	0	7.83207	1	6.90056	1	8.53136	1	6.79337	1	5.27591	1	5.71008	0	1.02277	1	8.10268	0	8.60112	0	4.85467	1	5.80724	1	2.7532
139	Oligodendroglioma	1	TCGA-DU-A6S3	0	21.55	0	21.55	0	#NULL!	0	60	0	1	#NULL!	0	0	#NULL!	0	#NULL!	Supratentorial, Frontal Lobe	0	Motor/Movement Changes	8.25371	1	7.41708	0	7.3483	1	6.88038	1	8.21533	0	7.23084	1	5.39124	1	6.08919	0	0	0	8.00653	0	8.71384	0	4.84518	1	5.07617	1	2.56587
140	Oligoastrocytoma	2	TCGA-DU-A6S6	0	95.04	1	74.8	0	#NULL!	1	35	0	2	90	0	0	#NULL!	1	#NULL!	Supratentorial, Frontal Lobe	0	Headaches	8.17526	1	7.48697	0	7.24815	0	6.7432	1	8.2307	0	7.05611	1	5.95228	1	6.10531	0	0	0	7.83558	0	8.62096	0	4.93005	1	6.46157	1	2.92915
141	Astrocytoma	3	TCGA-DU-A6S7	0	20.96	0	20.96	1	#NULL!	1	27	1	0	90	1	1	#NULL!	1	1	Supratentorial, Frontal Lobe	0	Seizures	8.23877	1	7.96621	1	7.27355	0	6.73732	1	7.68213	0	7.06698	1	5.75044	1	6.50682	1	0.354663	1	7.92842	0	8.73942	0	4.84765	1	4.2234	0	0.354663
142	Oligodendroglioma	4	TCGA-DU-A6S8	0	22.27	1	21.06	1	#NULL!	1	74	1	1	90	0	0	#NULL!	1	1	Supratentorial, Frontal Lobe	0	Mental Status Changes	7.78455	0	7.37371	0	7.36875	1	6.75047	1	7.84114	0	7.16344	1	4.55255	0	6.06748	0	0	0	8.17288	0	8.50752	0	3.78379	0	4.11946	0	2.76709
143	Oligodendroglioma	1	TCGA-DU-A76K	1	11.4	1	6.67	0	#NULL!	0	87	0	1	100	1	0	#NULL!	0	#NULL!	Supratentorial, Parietal Lobe	0	Headaches	8.11172	1	7.99508	1	6.6878	0	6.89886	1	8.19943	0	6.94188	1	5.88837	1	6.73562	1	0.498773	1	7.98588	0	8.54338	0	3.53525	0	4.86762	0	2.58677
144	Oligodendroglioma	4	TCGA-DU-A76L	1	26.74	1	13.47	1	#NULL!	0	54	1	1	#NULL!	1	0	#NULL!	1	#NULL!	Supratentorial, Temporal Lobe	0	Headaches	8.37821	1	7.91572	1	6.94074	0	5.73401	0	7.75818	0	6.6834	0	4.66497	0	5.68834	0	0.758279	1	8.60862	1	8.89756	1	3.08199	0	5.39012	1	3.16518
145	Astrocytoma	0	TCGA-DU-A76O	0	17.15	0	17.15	0	#NULL!	0	30	0	0	#NULL!	1	1	#NULL!	1	0	Supratentorial, Frontal Lobe	0	Seizures	8.4822	1	7.87576	1	6.86901	0	6.823	1	7.89223	0	7.21397	1	5.22718	1	6.59416	1	0.867395	1	8.12076	0	8.64113	0	4.12313	0	5.19571	1	1.87533
146	Oligodendroglioma	4	TCGA-DU-A76R	1	21.29	1	11.1	1	#NULL!	0	51	1	1	50	1	0	#NULL!	0	#NULL!	Supratentorial, Frontal Lobe	0	Mental Status Changes	7.70247	0	7.21263	0	7.30948	0	6.46902	0	8.52706	1	6.42125	0	6.06815	1	6.24643	0	0.36221	1	8.15171	0	8.96201	1	4.30274	1	6.9461	1	1.75819
147	Oligodendroglioma	4	TCGA-DU-A7T6	1	17.97	1	17.97	1	#NULL!	1	73	1	1	60	#NULL!	0	#NULL!	#NULL!	#NULL!	Supratentorial, Frontal Lobe	0	Headaches	8.31288	1	7.4634	0	7.36744	1	6.54152	0	7.97737	0	7.13385	1	4.74841	0	6.10616	0	0.25797	1	8.16199	0	8.75919	0	4.41651	1	4.91963	0	1.63312
148	Oligoastrocytoma	2	TCGA-DU-A7T8	1	138.93	1	99.47	0	#NULL!	0	35	1	2	100	1	0	#NULL!	1	#NULL!	Supratentorial, Frontal Lobe	0	Mental Status Changes	8.38183	1	7.94031	1	7.19489	0	6.83376	1	8.04431	0	7.28943	1	5.102	0	6.53913	1	0.891998	1	8.25836	0	8.86011	1	4.10097	0	5.50009	1	3.13374
149	Oligodendroglioma	1	TCGA-DU-A7TA	0	84.26	0	84.26	0	#NULL!	0	32	0	1	80	1	0	#NULL!	1	#NULL!	Supratentorial, Occipital Lobe	0	Visual Changes	8.03949	1	7.98	1	6.99533	0	7.01343	1	8.11867	0	7.06231	1	4.40485	0	6.62828	1	0.335043	1	8.48448	1	7.71163	0	4.24641	1	4.72595	0	4.33886
150	Oligodendroglioma	1	TCGA-DU-A7TB	0	51.48	1	2.43	0	#NULL!	0	56	0	1	100	0	0	#NULL!	1	#NULL!	Supratentorial, Temporal Lobe	0	Seizures	8.01127	0	7.69906	1	7.31329	1	6.27121	0	8.05064	0	6.99947	1	4.17664	0	6.21889	0	0.734385	1	8.49177	1	8.966	1	3.99132	0	5.10422	1	1.15323
151	Astrocytoma	0	TCGA-DU-A7TC	0	37.35	1	36.6	0	#NULL!	0	32	0	0	90	0	0	#NULL!	0	#NULL!	Supratentorial, Frontal Lobe	0	Headaches	8.13125	1	7.45266	0	7.16758	0	6.31269	0	7.74042	0	6.84719	1	5.1239	0	6.40096	1	0	0	8.08033	0	8.64551	0	3.2877	0	5.07995	1	2.3394
152	Oligoastrocytoma	2	TCGA-DU-A7TD	1	7.49	1	6.18	0	#NULL!	0	52	1	2	60	1	0	#NULL!	1	#NULL!	Supratentorial, Temporal Lobe	0	Motor/Movement Changes	8.40739	1	7.77001	1	6.94273	0	7.22409	1	8.13523	0	6.7217	0	5.00734	0	6.19243	0	1.15111	1	8.39486	1	9.11045	1	4.54279	1	5.72434	1	2.43151
153	Oligodendroglioma	1	TCGA-DU-A7TG	1	44.38	1	22	0	#NULL!	0	40	0	1	70	0	0	#NULL!	1	#NULL!	Supratentorial, Frontal Lobe	0	Mental Status Changes	7.78322	0	6.98901	0	7.73577	1	6.3898	0	8.57801	1	6.3496	0	5.24228	1	5.84035	0	0	0	8.07182	0	8.71847	0	3.79791	0	5.85442	1	3.82205
154	Astrocytoma	3	TCGA-DU-A7TI	1	38.86	1	27	1	#NULL!	0	32	1	0	100	1	1	#NULL!	1	#NULL!	Supratentorial, Frontal Lobe	0	Seizures	7.95708	0	7.6547	1	7.28007	0	7.13458	1	8.63741	1	6.49491	0	5.57165	1	6.42523	1	0.628395	1	8.4382	1	8.79711	0	4.69148	1	5.50132	1	2.13228
155	Astrocytoma	3	TCGA-DU-A7TJ	0	0.56	0	0.56	1	#NULL!	0	55	1	0	#NULL!	#NULL!	0	#NULL!	#NULL!	1	Supratentorial, Temporal Lobe	0	Seizures	8.3468	1	8.26087	1	6.66115	0	6.78927	1	8.47562	1	6.83958	1	5.03469	0	6.30115	1	0.832518	1	8.60078	1	9.15309	1	4.24174	1	6.18867	1	1.18586
156	Astrocytoma	3	TCGA-E1-5302	1	50.1	1	40.8	1	#NULL!	0	41	1	0	100	1	1	#NULL!	#NULL!	#NULL!	Supratentorial, Frontal Lobe	0	Seizures	8.1944	1	7.50766	0	7.10462	0	7.27709	1	8.23264	0	6.60646	0	5.20608	0	6.75258	1	0.776017	1	8.1365	0	8.83946	1	4.70819	1	5.40563	1	2.5126
157	Astrocytoma	3	TCGA-E1-5303	1	67.41	1	5.12	1	#NULL!	0	38	1	0	80	1	1	#NULL!	#NULL!	#NULL!	Supratentorial, Frontal Lobe	0	Seizures	8.01358	0	7.31564	0	7.24786	0	6.38734	0	8.21331	0	6.45544	0	5.01162	0	6.50437	1	0	0	8.26497	0	8.85631	1	4.2495	1	4.64788	0	3.0805
158	Astrocytoma	3	TCGA-E1-5304	1	41.1	1	29.66	1	#NULL!	0	42	1	0	90	1	0	#NULL!	#NULL!	#NULL!	Supratentorial, Frontal Lobe	0	Headaches	8.32786	1	7.78683	1	7.63078	1	7.1032	1	7.7388	0	7.09701	1	4.78646	0	6.0254	0	0	0	8.19857	0	8.64245	0	5.34555	1	4.5608	0	1.71822
159	Astrocytoma	3	TCGA-E1-5305	1	79.93	1	52.69	1	#NULL!	0	34	1	0	100	1	0	#NULL!	#NULL!	#NULL!	Supratentorial, Frontal Lobe	0	Seizures	7.68816	0	7.02118	0	7.59263	1	5.9817	0	8.51617	1	6.57846	0	5.21042	0	6.26762	0	0	0	8.09088	0	9.05441	1	4.66393	1	4.41938	0	1.49801
160	Astrocytoma	3	TCGA-E1-5307	1	57.88	1	47.7	1	#NULL!	1	62	1	0	80	1	1	#NULL!	#NULL!	#NULL!	Supratentorial, Temporal Lobe	0	Mental Status Changes	7.84428	0	7.23955	0	7.71262	1	6.29269	0	8.44667	1	6.33406	0	5.46335	1	6.08972	0	0.313423	1	8.26176	0	9.04123	1	5.27667	1	4.99631	0	1.27441
161	Oligodendroglioma	4	TCGA-E1-5311	1	134.17	1	85.48	1	#NULL!	0	31	1	1	100	1	0	#NULL!	#NULL!	#NULL!	Supratentorial, Temporal Lobe	0	Headaches	7.82619	0	6.99507	0	8.14187	1	6.77555	1	8.71391	1	6.75941	1	5.53143	1	5.98676	0	0	0	8.34236	1	9.09364	1	5.08866	1	5.9084	1	2.63677
162	Oligodendroglioma	1	TCGA-E1-5318	1	78.15	1	11.89	0	#NULL!	1	42	0	1	100	1	1	#NULL!	#NULL!	#NULL!	Supratentorial, Frontal Lobe	0	Headaches	8.21447	1	7.00797	0	8.06582	1	6.99735	1	8.20588	0	7.00524	1	5.02681	0	5.92667	0	0	0	8.45538	1	9.15101	1	5.23785	1	4.1258	0	1.38837
163	Oligodendroglioma	1	TCGA-E1-5319	1	95.5	1	30.32	0	#NULL!	1	48	0	1	100	0	0	#NULL!	#NULL!	#NULL!	Supratentorial, Frontal Lobe	0	Visual Changes	7.94159	0	6.92783	0	7.59071	1	6.5405	0	8.36267	1	6.33015	0	5.10522	0	6.18267	0	0	0	8.37876	1	8.99939	1	4.29988	1	5.01595	1	3.3144
164	Oligoastrocytoma	2	TCGA-E1-5322	1	130.68	1	35.64	0	#NULL!	1	38	0	2	90	#NULL!	0	#NULL!	#NULL!	#NULL!	Supratentorial, Temporal Lobe	0	Seizures	8.04459	1	7.2165	0	7.43587	1	6.78497	1	8.51283	1	6.85054	1	5.04214	0	6.43556	1	0	0	8.22262	0	8.45766	0	5.08456	1	5.10406	1	3.85594
165	Astrocytoma	3	TCGA-E1-A7YD	1	14.29	1	9.33	1	#NULL!	0	57	1	0	#NULL!	1	1	#NULL!	1	#NULL!	Supratentorial, Temporal Lobe	0	Headaches	7.75875	0	7.709	1	6.84626	0	6.98574	1	8.42603	1	6.70431	0	5.43325	1	6.80447	1	2.6085	1	8.48536	1	8.92547	1	3.95533	0	5.39262	1	1.9228
166	Astrocytoma	3	TCGA-E1-A7YE	1	29.11	1	27.79	1	#NULL!	1	32	1	0	90	1	1	#NULL!	1	#NULL!	Supratentorial, Frontal Lobe	0	Seizures	8.1254	1	7.16372	0	7.19373	0	7.1893	1	8.38294	1	6.66721	0	5.07502	0	6.29998	1	0.497862	1	8.04575	0	8.95653	1	3.57908	0	5.11107	1	1.07691
167	Astrocytoma	3	TCGA-E1-A7YH	1	93.13	1	91.62	1	#NULL!	1	47	1	0	80	1	0	#NULL!	1	#NULL!	Supratentorial, Temporal Lobe	0	Seizures	8.03368	1	7.8668	1	7.29742	0	6.69667	1	7.87627	0	6.93559	1	4.95775	0	6.40416	1	0	0	8.31022	0	8.6211	0	3.72589	0	4.60876	0	1.30158
168	Astrocytoma	3	TCGA-E1-A7YI	1	3.65	1	1.84	1	#NULL!	1	33	1	0	80	0	0	#NULL!	0	#NULL!	Supratentorial, Occipital Lobe	0	Motor/Movement Changes	8.39549	1	7.98554	1	7.45669	1	6.24567	0	7.771	0	7.00898	1	4.90766	0	5.65367	0	0.28578	1	8.59163	1	9.13267	1	4.54632	1	5.39207	1	1.29374
169	Astrocytoma	3	TCGA-E1-A7YJ	1	19.45	1	18.82	1	#NULL!	0	55	1	0	80	1	0	#NULL!	1	#NULL!	Supratentorial, Frontal Lobe	0	Motor/Movement Changes	8.42209	1	8.48733	1	6.28225	0	5.54883	0	7.65339	0	6.98215	1	4.17998	0	6.07551	0	0	0	8.54901	1	8.22917	0	2.11595	0	4.95494	0	4.4436
170	Astrocytoma	3	TCGA-E1-A7YK	1	12.42	1	12.42	1	#NULL!	0	52	1	0	90	1	1	#NULL!	1	#NULL!	Supratentorial, Temporal Lobe	0	Seizures	8.26716	1	7.63742	1	6.72951	0	6.29644	0	7.92656	0	6.72902	0	4.12909	0	6.44674	1	0	0	8.13835	0	8.80312	0	2.61557	0	4.44052	0	3.78263
171	Astrocytoma	3	TCGA-E1-A7YL	1	16.16	1	10.81	1	#NULL!	0	46	1	0	80	1	0	#NULL!	1	0	Supratentorial, Frontal Lobe	0	Headaches	8.33056	1	7.74297	1	6.48092	0	7.01657	1	7.85527	0	6.62777	0	5.53327	1	6.91623	1	1.78984	1	8.37692	1	8.98549	1	3.81799	0	5.2914	1	3.55968
172	Astrocytoma	3	TCGA-E1-A7YM	1	21.29	1	16.33	1	#NULL!	0	63	1	0	80	1	1	#NULL!	1	1	Supratentorial, Temporal Lobe	0	Headaches	7.74525	0	7.90801	1	6.79536	0	6.3484	0	8.09953	0	6.64835	0	5.35339	1	6.22349	0	1.08876	1	8.13726	0	8.80751	0	3.63624	0	5.47213	1	1.49259
173	Astrocytoma	3	TCGA-E1-A7YN	1	23.88	1	15.93	1	#NULL!	1	63	1	0	80	1	0	#NULL!	1	0	Supratentorial, Temporal Lobe	0	Visual Changes	8.1174	1	7.47225	0	6.65647	0	6.24889	0	7.94649	0	6.45687	0	5.00602	0	6.16789	0	0.741699	1	8.34702	1	8.80833	0	2.92274	0	4.64778	0	1.32144
174	Oligodendroglioma	4	TCGA-E1-A7YO	1	74.97	1	72.01	1	#NULL!	0	45	1	1	100	0	0	#NULL!	1	#NULL!	Supratentorial, Frontal Lobe	0	Seizures	7.88775	0	7.41894	0	7.79265	1	6.63814	0	8.42973	1	6.79492	1	5.43287	1	5.91821	0	0	0	8.20507	0	8.82646	0	4.92621	1	5.00828	1	2.36886
175	Oligodendroglioma	4	TCGA-E1-A7YQ	1	51.84	1	37.75	1	#NULL!	1	58	1	1	60	1	0	#NULL!	1	#NULL!	Supratentorial, Temporal Lobe	0	Headaches	7.88725	0	7.80523	1	6.91393	0	5.85664	0	8.08263	0	6.50194	0	5.44079	1	6.56409	1	3.94661	1	8.53261	1	8.83304	1	3.61925	0	5.33094	1	3.72293
176	Oligodendroglioma	4	TCGA-E1-A7YS	1	15.31	1	15.31	1	#NULL!	0	71	1	1	80	1	1	#NULL!	1	#NULL!	Supratentorial, Temporal Lobe	0	Mental Status Changes	7.64582	0	7.2121	0	8.09232	1	6.20063	0	8.28523	1	6.93254	1	4.92067	0	5.72535	0	0	0	8.3368	1	8.72234	0	5.13567	1	4.36612	0	0
177	Oligoastrocytoma	2	TCGA-E1-A7YU	1	0.76	1	0.76	0	#NULL!	0	42	1	2	80	0	#NULL!	#NULL!	1	#NULL!	Supratentorial, Frontal Lobe	0	Headaches	8.14558	1	7.87128	1	7.29591	0	7.02179	1	8.05969	0	6.87617	1	5.24111	1	6.15448	0	0	0	8.23746	0	8.81493	0	4.03639	0	4.01946	0	1.06526
178	Oligoastrocytoma	2	TCGA-E1-A7YV	1	32.42	1	31.14	0	#NULL!	1	26	1	2	90	1	1	#NULL!	1	1	Supratentorial, Frontal Lobe	0	Headaches	7.81537	0	7.80858	1	7.41211	1	7.26424	1	8.12313	0	6.76815	1	5.43347	1	6.071	0	0.373768	1	8.38828	1	8.81693	0	4.70239	1	5.07836	1	0.85845
179	Oligoastrocytoma	2	TCGA-E1-A7YW	1	36.79	1	35.64	0	#NULL!	0	28	0	2	90	1	1	#NULL!	0	#NULL!	Supratentorial, Parietal Lobe	0	Seizures	8.12736	1	7.94461	1	7.64969	1	6.97848	1	8.34391	1	6.72058	0	5.51041	1	6.66129	1	0.866344	1	8.37839	1	8.93098	1	4.05189	0	5.1469	1	2.48704
180	Oligodendroglioma	1	TCGA-E1-A7YY	1	146.02	1	140.14	0	#NULL!	1	27	0	1	100	1	0	#NULL!	0	#NULL!	Supratentorial, Frontal Lobe	0	Seizures	7.73651	0	7.22187	0	7.88982	1	6.55732	0	8.59513	1	6.25835	0	5.21917	0	5.76268	0	0.323097	1	8.15216	0	8.78023	0	3.86135	0	5.15553	1	2.83429
181	Oligodendroglioma	1	TCGA-E1-A7Z2	1	13.07	1	8.84	0	#NULL!	1	58	0	1	80	0	1	#NULL!	1	0	Supratentorial, Frontal Lobe	0	Seizures	7.72423	0	7.54565	1	6.99329	0	5.47053	0	8.27274	0	6.97582	1	5.96834	1	6.43831	1	0.343732	1	8.18761	0	8.76262	0	3.40536	0	4.59554	0	2.4912
182	Astrocytoma	0	TCGA-E1-A7Z3	1	73.42	1	68.07	0	#NULL!	1	31	0	0	#NULL!	1	0	#NULL!	0	#NULL!	Supratentorial, Parietal Lobe	0	Seizures	7.99454	0	7.95312	1	7.28363	0	6.75315	1	8.53941	1	6.52052	0	4.87352	0	6.253	0	0.690143	1	8.21724	0	8.78801	0	3.76692	0	4.67157	0	2.59715
183	Astrocytoma	0	TCGA-E1-A7Z4	1	144.94	1	142.54	0	#NULL!	0	35	0	0	90	1	1	#NULL!	0	1	Supratentorial, Frontal Lobe	0	Headaches	8.0461	1	7.75369	1	7.11822	0	6.01655	0	7.62047	0	6.83137	1	5.66056	1	6.9848	1	0	0	8.49109	1	8.54081	0	4.27347	1	5.07859	1	2.14449
184	Astrocytoma	0	TCGA-E1-A7Z6	1	32.33	1	31.9	0	#NULL!	1	41	0	0	90	1	0	#NULL!	0	1	Supratentorial, Frontal Lobe	0	Headaches	8.07851	1	7.68502	1	7.6007	1	6.61693	0	8.59143	1	6.55372	0	5.99516	1	6.44156	1	0.880083	1	8.39285	1	8.89648	1	4.32172	1	5.44855	1	3.48169
185	Oligodendroglioma	1	TCGA-EZ-7264	0	39.45	0	39.45	0	#NULL!	1	47	0	1	80	0	0	#NULL!	#NULL!	#NULL!	Supratentorial, Frontal Lobe	0	Mental Status Changes	7.59643	0	7.33241	0	7.96461	1	7.05962	1	8.22176	0	6.85546	1	4.80163	0	5.92916	0	0	0	8.2524	0	8.82818	0	4.45129	1	5.17246	1	0.98507
186	Oligodendroglioma	1	TCGA-F6-A8O3	0	0.23	0	0.23	0	#NULL!	0	34	0	1	60	#NULL!	#NULL!	#NULL!	#NULL!	#NULL!	Supratentorial, Frontal Lobe	0	Headaches	8.21484	1	7.67887	1	7.42397	1	6.62421	0	8.87041	1	7.04024	1	5.0223	0	6.19289	0	0	0	8.42244	1	9.10377	1	4.55053	1	4.58967	0	3.19819
187	Astrocytoma	0	TCGA-F6-A8O4	0	0.2	0	0.2	0	#NULL!	0	44	0	0	80	#NULL!	1	#NULL!	#NULL!	#NULL!	Supratentorial, Frontal Lobe	0	Headaches	8.07441	1	7.59548	1	7.43214	1	6.93405	1	8.42469	1	6.82472	1	5.7675	1	6.67672	1	0	0	8.23137	0	8.82847	0	4.64425	1	4.35766	0	1.97846
188	Oligodendroglioma	4	TCGA-FG-5962	0	47.73	0	47.73	1	#NULL!	0	54	1	1	80	1	1	#NULL!	#NULL!	#NULL!	Supratentorial, Occipital Lobe	0	Visual Changes	7.96402	0	6.95855	0	7.59647	1	6.55048	0	8.70201	1	6.45408	0	5.71124	1	5.90152	0	0.275736	1	8.11962	0	8.91215	1	4.22393	1	5.91919	1	2.86265
189	Astrocytoma	3	TCGA-FG-5963	1	25.46	1	16.33	1	#NULL!	0	23	1	0	90	1	0	#NULL!	#NULL!	#NULL!	Supratentorial, Frontal Lobe	0	Seizures	7.94813	0	8.03393	1	6.8737	0	6.4128	0	7.94502	0	6.76128	1	4.65954	0	6.24857	0	0.291251	1	8.01288	0	9.00657	1	3.2844	0	5.38777	1	2.82667
190	Oligodendroglioma	1	TCGA-FG-5964	0	52.17	0	52.17	0	#NULL!	0	62	0	1	60	1	1	#NULL!	#NULL!	#NULL!	Supratentorial, Parietal Lobe	0	Seizures	8.32861	1	7.52598	1	7.14455	0	7.05941	1	7.89676	0	7.01757	1	4.67128	0	6.17482	0	0	0	8.16209	0	8.7921	0	3.12252	0	4.77514	0	2.4896
191	Oligoastrocytoma	2	TCGA-FG-5965	1	36.79	1	34	0	#NULL!	1	39	0	2	90	0	0	#NULL!	#NULL!	#NULL!	Supratentorial, Frontal Lobe	0	Seizures	8.13606	1	7.75407	1	7.4857	1	7.60624	1	8.67173	1	6.90729	1	5.34111	1	6.40288	1	0.802405	1	8.39071	1	9.04053	1	4.84548	1	5.09099	1	0.931613
192	Astrocytoma	3	TCGA-FG-6688	0	18.76	1	13.3	1	#NULL!	1	59	1	0	80	1	1	#NULL!	#NULL!	#NULL!	Supratentorial, Parietal Lobe	0	Seizures	7.97118	0	7.52751	1	6.20892	0	6.87143	1	8.20161	0	6.55812	0	4.82282	0	6.98804	1	0.907815	1	8.41022	1	9.01264	1	2.52263	0	4.75344	0	2.03536
193	Astrocytoma	0	TCGA-FG-6689	0	14.91	1	7.16	0	#NULL!	0	30	0	0	70	1	0	#NULL!	#NULL!	#NULL!	Supratentorial, Frontal Lobe	0	Headaches	8.04801	1	7.49511	0	7.42042	1	6.6165	0	8.50853	1	6.53623	0	5.24489	1	6.33192	1	0.503197	1	8.26578	0	8.66079	0	4.00655	0	4.98716	0	2.21652
194	Oligodendroglioma	1	TCGA-FG-6690	0	42.51	0	42.51	0	#NULL!	0	70	0	1	90	1	1	#NULL!	#NULL!	#NULL!	Supratentorial, Frontal Lobe	0	Seizures	8.19123	1	7.45724	0	7.4634	1	6.81901	1	8.41685	1	6.66107	0	5.28807	1	6.35829	1	0.345007	1	8.3312	1	8.90748	1	4.7847	1	4.44812	0	1.97137
195	Astrocytoma	0	TCGA-FG-6691	0	41.29	1	29.99	0	#NULL!	1	23	0	0	100	0	0	#NULL!	#NULL!	#NULL!	Supratentorial, Temporal Lobe	0	Headaches	7.94753	0	7.61772	1	7.4555	1	6.60943	0	8.22951	0	6.36066	0	5.5488	1	6.32236	1	0.530746	1	8.37156	1	9.10872	1	5.08998	1	4.75209	0	1.42328
196	Oligodendroglioma	4	TCGA-FG-6692	1	18.43	1	18.43	1	#NULL!	0	63	1	1	40	1	0	#NULL!	#NULL!	#NULL!	Supratentorial, Frontal Lobe	0	Seizures	8.71724	1	8.32566	1	5.98888	0	6.85956	1	7.78228	0	6.69703	0	5.04343	0	6.86543	1	0	0	8.55045	1	9.07654	1	2.2609	0	6.16097	1	1.22545
197	Oligodendroglioma	1	TCGA-FG-7634	0	15.34	0	15.34	0	#NULL!	0	28	0	1	60	0	1	#NULL!	#NULL!	#NULL!	Supratentorial, Frontal Lobe	0	Seizures	7.97888	0	7.13777	0	7.41592	1	6.82139	1	8.50593	1	6.60674	0	5.0891	0	6.08245	0	0	0	8.34444	1	9.05679	1	4.71319	1	4.90257	0	3.51391
198	Astrocytoma	3	TCGA-FG-7636	0	17.87	0	17.87	1	#NULL!	0	48	1	0	90	1	1	#NULL!	#NULL!	#NULL!	Supratentorial, Frontal Lobe	0	Headaches	8.39523	1	7.37228	0	7.30666	0	7.17219	1	8.30537	1	6.99096	1	5.08604	0	6.55984	1	0	0	8.33925	1	9.17432	1	4.26182	1	4.11996	0	1.57652
199	Oligoastrocytoma	2	TCGA-FG-7637	0	40.05	0	40.05	0	#NULL!	0	49	0	2	80	0	0	#NULL!	#NULL!	#NULL!	Supratentorial, Temporal Lobe	0	Seizures	8.11488	1	6.94435	0	7.58181	1	6.4865	0	8.31136	1	6.59081	0	5.01608	0	6.27069	0	0	0	8.44919	1	8.93318	1	5.45835	1	5.58718	1	0.883189
200	Oligodendroglioma	4	TCGA-FG-7638	0	22.54	1	13.37	1	#NULL!	1	31	1	1	100	1	1	#NULL!	#NULL!	#NULL!	Supratentorial, Frontal Lobe	0	Headaches	7.93093	0	6.91048	0	7.36623	1	6.79018	1	8.74648	1	6.66297	0	5.0812	0	6.23329	0	0	0	8.3085	0	8.84422	1	4.11541	0	5.2474	1	2.1754
201	Oligodendroglioma	1	TCGA-FG-7641	0	20.6	0	20.6	0	#NULL!	0	31	0	1	80	0	1	#NULL!	#NULL!	#NULL!	Supratentorial, Frontal Lobe	0	Headaches	7.72022	0	7.11731	0	7.86812	1	6.91203	1	8.55404	1	6.38246	0	5.54485	1	5.89939	0	0	0	8.09073	0	8.62545	0	4.5661	1	5.19277	1	2.1494
202	Oligoastrocytoma	2	TCGA-FG-7643	0	20.07	1	8.34	0	#NULL!	1	49	0	2	100	0	0	#NULL!	#NULL!	#NULL!	Supratentorial, Frontal Lobe	0	Seizures	7.73074	0	8.03787	1	7.52577	1	6.18327	0	8.53222	1	6.37305	0	5.05111	0	5.90719	0	0	0	8.24088	0	8.89545	1	3.36449	0	5.11402	1	3.83563
203	Oligoastrocytoma	2	TCGA-FG-8181	0	28.32	0	28.32	0	#NULL!	0	23	1	2	90	1	1	#NULL!	#NULL!	#NULL!	Supratentorial, Frontal Lobe	0	[Not Available]	7.76341	0	6.99839	0	7.97384	1	6.52828	0	8.56741	1	6.04233	0	5.27556	1	5.48202	0	0.944334	1	8.16237	0	8.66159	0	3.33582	0	5.4015	1	4.27248
204	Oligodendroglioma	1	TCGA-FG-8182	0	13.67	0	13.67	0	#NULL!	0	35	0	1	80	0	1	#NULL!	#NULL!	#NULL!	Supratentorial, Frontal Lobe	0	Seizures	8.06678	1	7.54699	1	7.71887	1	6.74379	1	8.34632	1	6.91362	1	5.25462	1	6.20864	0	0	0	8.27303	0	8.6957	0	5.199	1	5.27891	1	1.487
205	Astrocytoma	3	TCGA-FG-8185	0	14.22	0	14.22	1	#NULL!	0	37	1	0	90	1	0	#NULL!	#NULL!	#NULL!	Supratentorial, Frontal Lobe	0	Headaches	8.0709	1	7.74447	1	7.4094	1	6.92564	1	7.86525	0	6.89698	1	5.54811	1	6.70142	1	0	0	8.48576	1	8.64803	0	4.41225	1	4.03079	0	1.13269
206	Oligoastrocytoma	2	TCGA-FG-8186	0	16	0	16	0	#NULL!	1	42	1	2	70	1	0	#NULL!	#NULL!	#NULL!	Supratentorial, Frontal Lobe	0	Seizures	8.00621	0	7.25086	0	7.19919	0	6.99749	1	8.29068	1	6.76988	1	5.44805	1	6.35735	1	0	0	8.31703	1	8.66323	0	4.4062	1	6.06516	1	2.95795
207	Oligoastrocytoma	2	TCGA-FG-8187	0	20.07	0	20.07	0	#NULL!	0	31	0	2	90	0	0	#NULL!	#NULL!	#NULL!	Supratentorial, Frontal Lobe	0	[Not Available]	7.8567	0	7.24044	0	7.11267	0	6.5692	0	8.54973	1	6.59896	0	5.86273	1	6.53869	1	0.350164	1	8.11767	0	8.69975	0	3.55427	0	5.64163	1	2.32477
208	Oligoastrocytoma	2	TCGA-FG-8188	0	14.95	1	12.61	0	#NULL!	0	41	0	2	90	0	1	#NULL!	#NULL!	#NULL!	Supratentorial, Temporal Lobe	0	Mental Status Changes	7.97402	0	7.42912	0	7.3265	1	6.77246	1	8.29294	1	6.68598	0	5.29217	1	6.50036	1	0.687934	1	8.37937	1	8.91114	1	3.97873	0	4.4205	0	0.910031
209	Oligodendroglioma	1	TCGA-FG-8189	0	22.5	0	22.5	0	#NULL!	1	33	0	1	70	1	0	#NULL!	1	#NULL!	Supratentorial, Temporal Lobe	0	Seizures	7.6982	0	6.99845	0	8.27914	1	6.88326	1	8.83434	1	6.159	0	5.26572	1	5.40247	0	0.64815	1	8.06097	0	8.77044	0	3.96998	0	5.912	1	2.58866
210	Oligodendroglioma	4	TCGA-FG-8191	0	32.59	0	32.59	1	#NULL!	0	30	1	1	80	1	0	#NULL!	#NULL!	#NULL!	Supratentorial, Frontal Lobe	0	Sensory Changes	7.88732	0	7.40977	0	7.38346	1	6.55563	0	8.28838	1	6.55163	0	4.74147	0	6.30537	1	0.310055	1	8.56196	1	8.74584	0	3.45108	0	5.25096	1	5.05357
211	Oligodendroglioma	1	TCGA-FG-A4MT	0	38.24	1	16.39	0	#NULL!	1	27	0	1	100	0	1	#NULL!	0	#NULL!	Supratentorial, Temporal Lobe	0	Seizures	7.81199	0	7.35754	0	7.0828	0	5.79292	0	7.47971	0	7.3105	1	4.87597	0	6.43948	1	0	0	8.36493	1	8.6229	0	3.88818	0	3.87467	0	0.503861
212	Oligoastrocytoma	2	TCGA-FG-A4MU	0	10.71	0	10.71	0	#NULL!	0	58	1	2	60	#NULL!	0	#NULL!	#NULL!	0	Supratentorial, Temporal Lobe	0	Headaches	8.36295	1	8.42538	1	6.55145	0	6.18175	0	7.93432	0	6.82086	1	4.75433	0	6.31976	1	0.803122	1	8.56064	1	8.79233	0	2.26465	0	5.1706	1	0.972066
213	Oligoastrocytoma	2	TCGA-FG-A4MW	1	18.36	1	7.42	0	#NULL!	0	63	1	2	80	1	0	#NULL!	1	0	Supratentorial, Frontal Lobe	0	Seizures	8.3805	1	8.25898	1	6.45437	0	6.48689	0	8.01213	0	6.57737	0	4.72996	0	6.2768	0	0.523189	1	8.42474	1	8.6376	0	2.42578	0	4.49619	0	1.11913
214	Astrocytoma	0	TCGA-FG-A4MX	0	18.69	0	18.69	0	#NULL!	0	47	0	0	100	1	0	#NULL!	0	0	Supratentorial, Frontal Lobe	0	Motor/Movement Changes	8.28421	1	8.38332	1	6.62007	0	5.97753	0	7.3985	0	6.95577	1	4.35111	0	6.84758	1	0	0	8.30453	0	7.96293	0	2.40154	0	3.46962	0	2.64278
215	Oligoastrocytoma	2	TCGA-FG-A4MY	0	23.69	0	23.69	0	#NULL!	1	44	0	2	80	1	0	#NULL!	0	#NULL!	Supratentorial, Parietal Lobe	0	Seizures	7.78849	0	7.96493	1	7.06302	0	6.28426	0	7.8129	0	7.07952	1	4.66084	0	5.91398	0	0	0	8.241	0	8.44652	0	3.3005	0	4.11564	0	1.10184
216	Oligoastrocytoma	2	TCGA-FG-A60J	0	14.75	0	14.75	0	#NULL!	1	47	0	2	90	0	1	#NULL!	0	1	Supratentorial, Frontal Lobe	0	Seizures	8.27269	1	7.74238	1	7.02195	0	6.34259	0	8.2995	1	6.86509	1	5.87574	1	6.49574	1	0	0	8.24305	0	8.5771	0	3.30646	0	5.68475	1	3.90003
217	Oligoastrocytoma	2	TCGA-FG-A60K	0	17.81	0	17.81	0	#NULL!	1	34	0	2	60	0	0	#NULL!	0	#NULL!	Supratentorial, Frontal Lobe	0	Mental Status Changes	8.00737	0	7.05132	0	7.50728	1	7.40618	1	8.22258	0	6.63634	0	5.37622	1	6.19601	0	1.1369	1	8.44646	1	8.83769	1	4.37896	1	4.84891	0	2.37384
218	Astrocytoma	0	TCGA-FG-A60L	0	21.52	0	21.52	0	#NULL!	1	34	0	0	100	0	1	#NULL!	0	#NULL!	Supratentorial, Temporal Lobe	0	Seizures	8.00946	0	7.86389	1	5.84362	0	7.03284	1	7.12537	0	7.07808	1	4.04803	0	6.88075	1	0	0	8.15569	0	8.70037	0	2.38226	0	4.38392	0	1.12145
219	Oligodendroglioma	1	TCGA-FG-A6IZ	0	15.01	0	15.01	0	#NULL!	0	60	0	1	100	1	1	#NULL!	0	1	Supratentorial, Not Otherwise Specified	0	Seizures	8.09165	1	7.22249	0	6.02472	0	6.94118	1	7.29104	0	7.34798	1	3.94442	0	6.61744	1	1.00353	1	8.19148	0	8.61343	0	2.22	0	4.6467	0	2.12147
220	Oligodendroglioma	1	TCGA-FG-A6J1	0	16.43	0	16.43	0	#NULL!	1	44	0	1	70	1	1	#NULL!	0	1	Supratentorial, Not Otherwise Specified	0	Seizures	8.01423	0	7.28666	0	6.1217	0	7.19128	1	7.67892	0	6.98344	1	4.72506	0	6.78347	1	0	0	8.12773	0	8.88653	1	2.49227	0	4.71297	0	3.74551
221	Astrocytoma	3	TCGA-FG-A6J3	0	22.24	1	9.36	1	#NULL!	1	52	1	0	90	1	0	#NULL!	1	1	Supratentorial, Frontal Lobe	0	Sensory Changes	7.80728	0	7.58435	1	5.70529	0	5.8133	0	6.6722	0	6.79872	1	3.67873	0	7.0981	1	0	0	8.04566	0	8.75213	0	0	0	4.87935	0	5.54399
222	Oligodendroglioma	1	TCGA-FG-A70Y	0	28.52	1	16.1	0	#NULL!	1	20	0	1	80	0	1	#NULL!	0	#NULL!	Supratentorial, Temporal Lobe	0	Headaches	8.09518	1	7.74954	1	7.05448	0	6.63551	0	7.9942	0	6.94692	1	5.56025	1	6.49821	1	0	0	8.23423	0	8.99685	1	3.43884	0	4.21335	0	0.813726
223	Oligoastrocytoma	2	TCGA-FG-A70Z	0	10.78	0	10.78	0	#NULL!	1	53	1	2	#NULL!	1	1	#NULL!	1	#NULL!	Supratentorial, Temporal Lobe	0	Headaches	8.26393	1	7.65808	1	6.68134	0	6.58456	0	8.29539	1	6.75644	1	5.26131	1	6.61297	1	1.67642	1	8.41654	1	8.94816	1	3.70011	0	5.97765	1	2.71085
224	Oligodendroglioma	1	TCGA-FG-A710	0	36.63	0	36.63	0	#NULL!	1	50	0	1	80	0	1	#NULL!	1	#NULL!	Supratentorial, Frontal Lobe	0	Headaches	8.06777	1	7.22371	0	7.18826	0	6.67163	1	8.04257	0	6.80883	1	5.16971	0	6.20127	0	0	0	8.3272	1	8.6406	0	4.20521	1	5.27423	1	2.61337
225	Oligodendroglioma	1	TCGA-FG-A711	1	48.65	1	41.95	0	#NULL!	1	33	0	1	90	0	1	#NULL!	0	#NULL!	Supratentorial, Frontal Lobe	0	Seizures	8.10437	1	7.60883	1	6.99074	0	6.80844	1	8.16543	0	6.84311	1	5.80726	1	6.6116	1	0.629781	1	8.31126	0	8.79051	0	3.70065	0	4.39769	0	2.65027
226	Oligoastrocytoma	2	TCGA-FG-A713	0	20.43	0	20.43	0	#NULL!	1	74	0	2	60	1	0	#NULL!	0	#NULL!	Supratentorial, Frontal Lobe	0	Headaches	7.87151	0	7.24783	0	7.59686	1	6.93343	1	8.46227	1	6.52361	0	5.28736	1	5.89347	0	0	0	7.90611	0	8.55047	0	4.15147	0	5.24181	1	2.39042
227	Astrocytoma	3	TCGA-FG-A87N	0	18.63	0	18.63	1	#NULL!	1	37	1	0	80	1	1	#NULL!	1	1	Supratentorial, Frontal Lobe	0	Seizures	8.40276	1	8.13285	1	7.43546	1	6.55763	0	7.79442	0	6.74465	1	4.81179	0	6.07703	0	0.636259	1	8.42329	1	8.92407	1	4.39869	1	5.21291	1	2.12964
228	Astrocytoma	3	TCGA-FG-A87Q	0	5.72	0	5.72	1	#NULL!	1	61	1	0	80	1	0	#NULL!	1	0	Supratentorial, Parietal Lobe	0	Seizures	8.20554	1	7.61844	1	6.48038	0	6.26515	0	8.17276	0	6.72154	0	5.63834	1	6.62861	1	1.09628	1	8.24346	0	8.44004	0	2.94113	0	5.91272	1	0.914209
229	Oligoastrocytoma	2	TCGA-FN-7833	0	27.5	0	27.5	0	#NULL!	0	25	1	2	80	1	#NULL!	#NULL!	#NULL!	#NULL!	Supratentorial, Frontal Lobe	0	Mental Status Changes	8.14554	1	7.83551	1	7.26865	0	6.31961	0	8.50041	1	6.61297	0	5.12462	0	6.44665	1	0.315467	1	8.33979	1	8.98625	1	4.01013	0	4.77247	0	1.17109
230	Oligodendroglioma	1	TCGA-HT-7467	0	0.1	0	0.1	0	#NULL!	0	54	0	1	100	#NULL!	0	#NULL!	#NULL!	#NULL!	Supratentorial, Parietal Lobe	0	Sensory Changes	7.78063	0	7.25776	0	7.64851	1	6.38257	0	8.65237	1	6.48416	0	4.94435	0	5.78375	0	0	0	8.23057	0	8.76963	0	4.2214	1	4.74208	0	3.07206
231	Oligodendroglioma	4	TCGA-HT-7468	0	6.67	0	6.67	1	#NULL!	0	30	1	1	80	0	0	#NULL!	#NULL!	#NULL!	Supratentorial, Parietal Lobe	0	Seizures	8.07595	1	7.08073	0	7.62019	1	7.13495	1	8.87315	1	6.63174	0	5.0211	0	6.21412	0	0.496706	1	8.52515	1	9.27955	1	4.88699	1	4.95045	0	1.27346
232	Oligodendroglioma	4	TCGA-HT-7469	1	11.53	1	3.02	1	#NULL!	0	30	1	1	#NULL!	1	1	#NULL!	#NULL!	#NULL!	Supratentorial, Temporal Lobe	0	Motor/Movement Changes	8.12088	1	7.77967	1	7.40789	1	8.07977	1	9.0209	1	6.90956	1	6.04948	1	6.45165	1	0.501623	1	8.19242	0	8.32152	0	4.90902	1	6.21579	1	0.501623
233	Oligodendroglioma	4	TCGA-HT-7470	1	40.08	1	40.08	1	#NULL!	0	37	1	1	90	1	0	#NULL!	#NULL!	#NULL!	Supratentorial, Temporal Lobe	0	Headaches	7.89	0	7.35669	0	7.58531	1	7.15481	1	8.82078	1	6.48836	0	5.357	1	6.11687	0	0.496098	1	8.30381	0	8.90381	1	4.30275	1	5.19765	1	1.17807
234	Oligodendroglioma	4	TCGA-HT-7471	0	0.13	0	0.13	1	#NULL!	1	37	1	1	80	#NULL!	1	#NULL!	#NULL!	#NULL!	Supratentorial, Temporal Lobe	0	Motor/Movement Changes	8.03123	1	7.16106	0	7.55474	1	7.28004	1	8.41154	1	6.79988	1	5.06678	0	6.12555	0	0	0	8.41885	1	8.88061	1	4.71176	1	5.18624	1	1.97564
235	Oligodendroglioma	1	TCGA-HT-7472	0	0.03	0	0.03	0	#NULL!	0	38	0	1	#NULL!	0	0	#NULL!	#NULL!	#NULL!	Supratentorial, Frontal Lobe	0	Seizures	7.97736	0	7.76285	1	7.42167	1	6.65255	1	8.82109	1	6.44077	0	5.01781	0	6.34812	1	0.288707	1	8.5266	1	8.9877	1	4.73733	1	4.82434	0	2.83706
236	Oligoastrocytoma	2	TCGA-HT-7473	0	16.52	0	16.52	0	#NULL!	0	28	0	2	80	1	0	#NULL!	#NULL!	#NULL!	Supratentorial, Temporal Lobe	0	Headaches	7.70883	0	7.5483	1	7.51513	1	6.86108	1	8.69806	1	6.50498	0	5.73993	1	6.65344	1	0.741461	1	8.37399	1	9.48821	1	4.61884	1	5.79231	1	3.9355
237	Oligoastrocytoma	2	TCGA-HT-7474	0	3.75	0	3.75	0	#NULL!	0	52	0	2	60	0	0	#NULL!	#NULL!	#NULL!	Supratentorial, Frontal Lobe	0	Seizures	7.81641	0	7.40655	0	7.56425	1	6.37856	0	8.79826	1	6.34802	0	5.40322	1	6.29517	0	0.303875	1	8.24481	0	8.75871	0	4.00053	0	4.5989	0	2.04741
238	Oligoastrocytoma	2	TCGA-HT-7475	0	17.41	0	17.41	0	#NULL!	0	67	1	2	70	1	0	#NULL!	#NULL!	#NULL!	Supratentorial, Frontal Lobe	0	Seizures	8.004	0	7.17612	0	7.69758	1	6.12287	0	8.54637	1	6.98721	1	5.2434	1	6.19568	0	0	0	8.23227	0	8.62643	0	4.43298	1	5.3854	1	1.66603
239	Astrocytoma	0	TCGA-HT-7476	0	6.54	0	6.54	0	#NULL!	0	26	0	0	80	1	1	#NULL!	#NULL!	#NULL!	Supratentorial, Temporal Lobe	0	Seizures	8.05553	1	7.45227	0	7.29642	0	6.5107	0	8.25379	0	6.5396	0	5.43854	1	6.21049	0	0.345361	1	8.24463	0	9.08985	1	4.02299	0	5.18399	1	2.08109
240	Astrocytoma	3	TCGA-HT-7477	0	24.24	0	24.24	1	#NULL!	0	62	1	0	80	1	1	#NULL!	1	#NULL!	Supratentorial, Frontal Lobe	0	Motor/Movement Changes	8.12275	1	8.07117	1	7.05804	0	6.1188	0	7.94687	0	6.85082	1	4.84855	0	5.7203	0	1.38762	1	8.36103	1	8.8502	1	4.10643	0	4.5803	0	4.10023
241	Astrocytoma	0	TCGA-HT-7478	0	6.37	0	6.37	0	#NULL!	0	36	0	0	80	1	1	#NULL!	#NULL!	#NULL!	Supratentorial, Frontal Lobe	0	Seizures	8.10193	1	7.82793	1	6.96422	0	7.42515	1	8.27008	0	6.26033	0	4.98632	0	6.31772	1	1.22177	1	8.36226	1	9.09765	1	3.73011	0	5.33511	1	1.22177
242	Astrocytoma	3	TCGA-HT-7479	0	40.31	1	23.16	1	#NULL!	0	44	1	0	#NULL!	1	0	#NULL!	#NULL!	#NULL!	Supratentorial, Frontal Lobe	0	Headaches	7.86955	0	7.29926	0	7.28793	0	6.5125	0	8.55312	1	6.48179	0	5.42593	1	6.63884	1	0.56412	1	8.22408	0	8.92624	1	3.67051	0	5.18369	1	3.32877
243	Oligodendroglioma	1	TCGA-HT-7480	0	75.13	1	63.83	0	#NULL!	0	33	0	1	80	1	0	#NULL!	#NULL!	#NULL!	Supratentorial, Frontal Lobe	0	Seizures	7.95047	0	7.23496	0	7.6829	1	7.43015	1	8.70773	1	6.67082	0	5.35033	1	5.93641	0	0.472563	1	8.20571	0	8.94179	1	5.09682	1	5.54843	1	1.31329
244	Oligodendroglioma	1	TCGA-HT-7481	0	95.86	1	100.89	0	#NULL!	0	39	0	1	#NULL!	1	0	#NULL!	#NULL!	#NULL!	Supratentorial, Frontal Lobe	0	Seizures	7.90359	0	7.30227	0	7.33463	1	6.75227	1	8.78232	1	6.50943	0	5.34604	1	6.11981	0	0	0	8.36956	1	8.70456	0	4.49276	1	4.88582	0	3.04352
245	Oligoastrocytoma	2	TCGA-HT-7482	0	106.87	1	12.29	0	#NULL!	1	18	0	2	100	1	1	#NULL!	#NULL!	#NULL!	Supratentorial, Frontal Lobe	0	Seizures	7.79893	0	7.38459	0	7.15333	0	6.63036	0	8.5417	1	6.38129	0	5.15935	0	6.5111	1	0	0	8.37998	1	8.67654	0	4.09193	0	5.1176	1	2.31383
246	Oligoastrocytoma	2	TCGA-HT-7483	0	172.63	0	172.63	0	#NULL!	0	14	0	2	80	1	0	#NULL!	#NULL!	#NULL!	Supratentorial, Frontal Lobe	0	Seizures	7.98078	0	7.42164	0	7.64687	1	6.34439	0	8.62982	1	6.56651	0	5.27271	1	6.17301	0	0	0	8.50522	1	8.94625	1	4.74571	1	4.9877	0	1.0335
247	Astrocytoma	0	TCGA-HT-7485	0	4.01	0	4.01	0	#NULL!	0	42	0	0	100	0	0	#NULL!	#NULL!	#NULL!	Supratentorial, Parietal Lobe	0	Headaches	7.75819	0	7.36834	0	7.27746	0	6.95737	1	8.91762	1	6.41439	0	6.15329	1	6.52158	1	0	0	8.38383	1	9.15549	1	4.59392	1	5.40087	1	3.08274
248	Astrocytoma	3	TCGA-HT-7601	0	5.03	0	5.03	1	#NULL!	1	30	1	0	80	1	1	#NULL!	#NULL!	#NULL!	Supratentorial, Frontal Lobe	0	Seizures	8.03831	1	7.57145	1	7.0494	0	7.49304	1	8.65802	1	6.50015	0	4.4011	0	6.21702	0	0.303506	1	8.40081	1	9.04844	1	3.86729	0	5.21491	1	1.43313
249	Oligodendroglioma	1	TCGA-HT-7602	0	29.83	0	29.83	0	#NULL!	0	21	0	1	80	0	0	#NULL!	#NULL!	#NULL!	Supratentorial, Frontal Lobe	0	Headaches	7.96895	0	7.48636	0	6.9362	0	6.57562	0	8.50675	1	6.4598	0	5.7534	1	6.73976	1	0.354943	1	8.28922	0	8.93382	1	3.12383	0	5.15422	1	2.71221
250	Oligodendroglioma	1	TCGA-HT-7603	0	23.16	0	23.16	0	#NULL!	0	29	0	1	60	1	#NULL!	#NULL!	#NULL!	#NULL!	Supratentorial, Frontal Lobe	0	Headaches	7.83949	0	6.73757	0	7.4567	1	6.5211	0	8.35381	1	6.33787	0	4.95476	0	6.2638	0	0.499926	1	8.49389	1	9.01	1	2.78758	0	4.84537	0	2.84576
251	Astrocytoma	0	TCGA-HT-7604	0	122.37	0	122.37	0	#NULL!	0	50	0	0	#NULL!	1	1	#NULL!	#NULL!	#NULL!	Supratentorial, Frontal Lobe	0	Headaches	8.11116	1	7.68784	1	7.58198	1	6.71319	1	8.29618	1	6.70642	0	5.07463	0	6.43623	1	0	0	8.56886	1	8.89854	1	4.55402	1	4.4136	0	2.83621
252	Oligodendroglioma	1	TCGA-HT-7605	0	4.57	0	4.57	0	#NULL!	0	38	0	1	60	0	0	#NULL!	#NULL!	#NULL!	Supratentorial, Frontal Lobe	0	Motor/Movement Changes	7.82793	0	7.04865	0	7.44783	1	6.84026	1	8.73782	1	6.38478	0	5.7817	1	6.17683	0	0	0	8.22044	0	8.80255	0	4.09869	0	5.96411	1	2.199
253	Astrocytoma	0	TCGA-HT-7606	0	17.28	0	17.28	0	#NULL!	1	30	0	0	80	1	1	#NULL!	#NULL!	#NULL!	Supratentorial, Frontal Lobe	0	Headaches	7.78017	0	7.22064	0	7.45785	1	6.20341	0	8.52655	1	6.84543	1	5.41528	1	6.45976	1	0	0	8.73699	1	8.31733	0	5.02136	1	3.76778	0	1.83209
254	Astrocytoma	0	TCGA-HT-7607	1	3.15	1	3.15	0	#NULL!	1	61	0	0	70	0	1	#NULL!	#NULL!	#NULL!	Supratentorial, Frontal Lobe	0	Seizures	7.71726	0	7.04266	0	7.74081	1	6.88431	1	8.66955	1	5.92981	0	5.55204	1	5.79385	0	0	0	8.16828	0	8.78245	0	4.19955	1	5.36028	1	2.2777
255	Oligoastrocytoma	2	TCGA-HT-7608	0	22.04	0	22.04	0	#NULL!	0	61	0	2	100	0	0	#NULL!	#NULL!	#NULL!	Supratentorial, Temporal Lobe	0	Motor/Movement Changes	7.96104	0	6.9703	0	7.39967	1	6.57564	0	8.69166	1	6.50206	0	5.57454	1	6.57297	1	0	0	8.16138	0	8.87932	1	4.43128	1	6.09704	1	1.94425
256	Oligoastrocytoma	2	TCGA-HT-7609	0	45.96	0	45.96	0	#NULL!	0	34	1	2	90	1	0	#NULL!	#NULL!	#NULL!	Supratentorial, Frontal Lobe	0	Headaches	8.17383	1	7.62694	1	7.50812	1	6.73151	1	8.73747	1	6.94277	1	5.58173	1	6.639	1	0	0	8.44688	1	8.8428	1	4.61896	1	4.29025	0	1.66396
257	Oligoastrocytoma	2	TCGA-HT-7610	0	56.04	1	39.59	0	#NULL!	1	25	0	2	#NULL!	0	1	#NULL!	#NULL!	#NULL!	Supratentorial, Temporal Lobe	0	Seizures	7.89221	0	7.46199	0	8.00115	1	6.84438	1	9.02679	1	6.31242	0	5.09947	0	5.83684	0	0	0	8.28181	0	8.9346	1	5.12178	1	5.16611	1	1.77241
258	Oligoastrocytoma	2	TCGA-HT-7611	0	57.56	0	57.56	0	#NULL!	0	36	0	2	90	0	0	#NULL!	0	#NULL!	Supratentorial, Frontal Lobe	0	[Not Available]	7.99665	0	7.61961	1	7.53895	1	6.63739	0	8.6682	1	6.66211	0	5.69595	1	6.31022	1	1.05135	1	8.30563	0	8.78242	0	5.13811	1	5.34169	1	4.99549
259	Oligodendroglioma	4	TCGA-HT-7616	1	0.23	1	0.23	1	#NULL!	0	75	1	1	80	0	0	#NULL!	#NULL!	#NULL!	Supratentorial, Frontal Lobe	0	Seizures	7.60498	0	7.04124	0	7.62065	1	6.57347	0	8.49791	1	6.4372	0	5.42522	1	5.94258	0	0	0	8.51295	1	8.65542	0	4.40962	1	4.09347	0	3.01155
260	Oligodendroglioma	4	TCGA-HT-7620	0	14.26	1	9.2	1	#NULL!	0	40	1	1	#NULL!	1	1	#NULL!	#NULL!	#NULL!	Supratentorial, Frontal Lobe	0	Headaches	7.77611	0	7.31389	0	7.13527	0	6.47498	0	8.41568	1	6.56029	0	5.73069	1	6.14217	0	0	0	8.22577	0	8.64147	0	4.04961	0	4.50027	0	0.719643
261	Oligodendroglioma	1	TCGA-HT-7676	0	0.16	0	0.16	0	#NULL!	0	26	0	1	60	#NULL!	1	#NULL!	#NULL!	#NULL!	Supratentorial, Frontal Lobe	0	Headaches	8.31234	1	7.65076	1	7.13529	0	6.68696	1	7.97541	0	6.7211	0	5.17917	0	6.61027	1	0	0	8.4191	1	9.00315	1	4.22869	1	4.45707	0	1.33529
262	Oligodendroglioma	4	TCGA-HT-7677	0	16.23	0	16.23	1	#NULL!	0	53	1	1	80	1	1	#NULL!	#NULL!	#NULL!	Supratentorial, Frontal Lobe	0	Motor/Movement Changes	8.05909	1	7.17834	0	7.5979	1	7.20115	1	8.57314	1	6.83006	1	5.29948	1	6.03787	0	0	0	8.45755	1	8.82629	0	4.92475	1	5.19405	1	1.73378
263	Astrocytoma	0	TCGA-HT-7680	0	0.76	0	0.76	0	#NULL!	1	32	0	0	80	0	#NULL!	#NULL!	#NULL!	#NULL!	Posterior Fossa, Cerebellum	0	Headaches	7.63634	0	7.2969	0	7.38212	1	6.35898	0	8.81995	1	5.9312	0	6.17638	1	6.88021	1	0.564632	1	8.22175	0	9.2353	1	3.31629	0	5.92311	1	3.91087
264	Oligoastrocytoma	2	TCGA-HT-7681	0	44.65	0	44.65	0	#NULL!	1	29	0	2	80	0	0	#NULL!	0	#NULL!	Supratentorial, Frontal Lobe	0	[Not Available]	7.94091	0	7.10081	0	7.28507	0	6.83266	1	8.5285	1	6.55029	0	5.55204	1	6.13681	0	0.847498	1	8.26188	0	8.9152	1	4.04337	0	5.30804	1	2.83352
265	Oligoastrocytoma	2	TCGA-HT-7684	0	6.04	0	6.04	0	#NULL!	0	58	1	2	80	0	1	#NULL!	#NULL!	#NULL!	Supratentorial, Frontal Lobe	0	Headaches	7.92387	0	7.46237	0	6.30367	0	5.74249	0	7.58808	0	6.36523	0	5.2679	1	6.83847	1	0	0	8.5582	1	8.48609	0	2.31277	0	5.44171	1	3.23721
266	Astrocytoma	3	TCGA-HT-7686	0	42.71	0	42.71	1	#NULL!	1	29	1	0	80	1	1	#NULL!	#NULL!	#NULL!	Supratentorial, Parietal Lobe	0	Headaches	8.11163	1	7.66167	1	7.16793	0	6.9539	1	8.27306	0	6.49204	0	4.9646	0	6.0135	0	2.41927	1	8.58557	1	9.05024	1	3.74517	0	4.43946	0	1.61381
267	Oligodendroglioma	4	TCGA-HT-7687	0	0.1	0	0.1	1	#NULL!	0	74	1	1	100	#NULL!	0	#NULL!	#NULL!	#NULL!	Supratentorial, Frontal Lobe	0	Visual Changes	8.10089	1	7.38179	0	7.86783	1	6.82401	1	8.46658	1	6.75025	1	4.83133	0	5.80163	0	0.303506	1	8.43034	1	8.7107	0	5.13468	1	4.54617	0	3.27843
268	Oligodendroglioma	4	TCGA-HT-7688	0	31.67	0	31.67	1	#NULL!	0	59	1	1	60	1	1	#NULL!	#NULL!	#NULL!	Supratentorial, Frontal Lobe	0	Headaches	7.71238	0	7.14349	0	7.9857	1	6.49453	0	8.61988	1	6.41221	0	5.00375	0	5.72679	0	0	0	8.30442	0	8.74065	0	4.5187	1	5.14937	1	3.28409
269	Oligodendroglioma	1	TCGA-HT-7689	0	14.95	0	14.95	0	#NULL!	1	58	0	1	60	1	1	#NULL!	#NULL!	#NULL!	Supratentorial, Frontal Lobe	0	Mental Status Changes	7.5447	0	8.02474	1	7.24043	0	6.21307	0	8.60347	1	6.64288	0	4.93995	0	6.39762	1	0	0	8.48068	1	8.99296	1	4.18998	1	4.67798	0	1.31464
270	Oligoastrocytoma	2	TCGA-HT-7690	0	0.1	0	0.1	0	#NULL!	0	29	1	2	100	0	0	#NULL!	#NULL!	#NULL!	Supratentorial, Frontal Lobe	0	Headaches	8.26278	1	7.82841	1	7.1718	0	6.49114	0	8.11785	0	6.98546	1	5.42936	1	6.09273	0	0.614212	1	8.58257	1	8.55491	0	3.83383	0	4.97029	0	5.97997
271	Astrocytoma	0	TCGA-HT-7691	0	0.1	0	0.1	0	#NULL!	1	31	0	0	#NULL!	0	0	#NULL!	#NULL!	#NULL!	Supratentorial, Not Otherwise Specified	0	Headaches	7.98263	0	8.19365	1	6.80129	0	6.42858	0	8.04624	0	6.32089	0	5.41474	1	6.52125	1	0	0	8.29135	0	9.16371	1	2.36925	0	6.12489	1	2.36925
272	Oligoastrocytoma	2	TCGA-HT-7692	0	2.96	0	2.96	0	#NULL!	0	43	0	2	100	1	1	#NULL!	#NULL!	#NULL!	Supratentorial, Frontal Lobe	0	Seizures	8.13046	1	7.29676	0	6.90571	0	6.64254	0	8.28195	0	6.67612	0	6.1484	1	6.66868	1	0	0	8.32336	1	8.52821	0	3.56237	0	4.87042	0	3.44813
273	Oligodendroglioma	1	TCGA-HT-7693	0	17.51	0	17.51	0	#NULL!	1	51	0	1	90	1	0	#NULL!	#NULL!	#NULL!	Supratentorial, Frontal Lobe	0	Seizures	8.02702	1	7.62063	1	7.40659	1	6.77529	1	8.1513	0	6.66649	0	5.11579	0	6.43296	1	0	0	8.5521	1	8.72284	0	4.00031	0	5.88826	1	3.15935
274	Oligodendroglioma	4	TCGA-HT-7694	0	6.9	0	6.9	1	#NULL!	0	60	1	1	90	1	0	#NULL!	#NULL!	#NULL!	Supratentorial, Frontal Lobe	0	Motor/Movement Changes	7.68054	0	7.05222	0	7.75893	1	6.61368	0	8.54153	1	6.45327	0	5.05115	0	5.97462	0	0	0	8.18743	0	8.70504	0	4.1663	1	5.01493	1	2.84
275	Oligodendroglioma	1	TCGA-HT-7695	0	14.52	0	14.52	0	#NULL!	1	29	0	1	100	1	1	#NULL!	#NULL!	#NULL!	Supratentorial, Frontal Lobe	0	Seizures	7.85523	0	7.00045	0	7.83003	1	6.8104	1	8.93418	1	6.41006	0	5.47708	1	5.99376	0	0	0	8.23112	0	8.83434	1	4.82892	1	5.66551	1	2.84717
276	Astrocytoma	0	TCGA-HT-7854	0	39.45	1	37.68	0	#NULL!	0	62	0	0	100	1	1	#NULL!	#NULL!	#NULL!	Supratentorial, Temporal Lobe	0	Visual Changes	8.19993	1	7.63155	1	7.28484	0	6.45588	0	8.8084	1	6.13455	0	6.39952	1	6.54085	1	0.306896	1	8.23769	0	9.27371	1	2.8636	0	5.68402	1	3.9305
277	Astrocytoma	3	TCGA-HT-7855	0	19.22	0	19.22	1	#NULL!	0	39	1	0	80	1	1	#NULL!	#NULL!	#NULL!	Supratentorial, Parietal Lobe	0	Headaches	7.93293	0	7.62136	1	7.93318	1	6.0186	0	8.16143	0	6.65749	0	5.50582	1	6.2204	0	0	0	8.57671	1	8.82607	0	5.11793	1	4.23976	0	0.537896
278	Oligodendroglioma	4	TCGA-HT-7856	0	39.06	0	39.06	1	#NULL!	0	35	1	1	#NULL!	1	1	#NULL!	#NULL!	#NULL!	Supratentorial, Frontal Lobe	0	Mental Status Changes	7.85181	0	7.28507	0	7.59407	1	6.65519	1	8.7418	1	6.56462	0	5.30461	1	5.89568	0	0.653678	1	7.97714	0	8.76884	0	3.92828	0	5.41966	1	2.69724
279	Astrocytoma	3	TCGA-HT-7857	0	0.23	0	0.23	1	#NULL!	1	24	1	0	80	0	1	#NULL!	#NULL!	#NULL!	Supratentorial, Not Otherwise Specified	0	Motor/Movement Changes	8.23572	1	7.98007	1	6.666	0	5.43894	0	7.47543	0	6.37638	0	4.60601	0	5.8903	0	0	0	8.43591	1	9.4607	1	2.19514	0	5.67129	1	6.02908
280	Astrocytoma	0	TCGA-HT-7858	0	50.59	0	50.59	0	#NULL!	0	28	0	0	100	1	0	#NULL!	#NULL!	#NULL!	Supratentorial, Frontal Lobe	0	Headaches	8.16398	1	7.63218	1	7.35569	1	6.54238	0	8.19273	0	6.73776	1	5.03178	0	6.29841	1	0	0	8.35559	1	8.71213	0	4.61663	1	4.6968	0	4.41099
281	Astrocytoma	3	TCGA-HT-7860	0	0.49	0	0.49	1	#NULL!	1	60	1	0	60	#NULL!	1	#NULL!	#NULL!	#NULL!	Supratentorial, Frontal Lobe	0	Seizures	8.0358	1	8.38882	1	7.09384	0	6.39878	0	8.75236	1	6.66045	0	5.30588	1	5.82103	0	0	0	8.3458	1	9.0544	1	4.34858	1	5.63928	1	1.79893
282	Oligoastrocytoma	2	TCGA-HT-7873	0	23.59	0	23.59	0	#NULL!	0	29	0	2	80	1	0	#NULL!	#NULL!	#NULL!	Supratentorial, Frontal Lobe	0	Headaches	7.85144	0	7.81647	1	7.56512	1	7.09143	1	8.25495	0	6.64161	0	6.28356	1	6.56509	1	0.683703	1	8.4088	1	8.91797	1	4.56957	1	4.52096	0	2.10357
283	Oligodendroglioma	4	TCGA-HT-7874	0	37.12	0	37.12	1	#NULL!	1	41	1	1	80	1	0	#NULL!	#NULL!	#NULL!	Supratentorial, Frontal Lobe	0	Headaches	7.7418	0	7.05431	0	7.88413	1	6.57164	0	8.82949	1	6.23713	0	5.41443	1	5.68555	0	0	0	8.18949	0	8.80712	0	4.49017	1	4.96348	0	2.91378
284	Oligodendroglioma	1	TCGA-HT-7875	0	0.33	0	0.33	0	#NULL!	0	56	0	1	80	1	1	#NULL!	#NULL!	#NULL!	Supratentorial, Frontal Lobe	0	Seizures	7.97378	0	7.21848	0	7.46863	1	7.12585	1	8.96159	1	6.76166	1	5.86325	1	6.25274	0	0	0	8.31925	1	9.03121	1	4.91365	1	5.22533	1	1.33054
285	Oligodendroglioma	1	TCGA-HT-7877	0	0.13	0	0.13	0	#NULL!	1	20	0	1	#NULL!	0	1	#NULL!	#NULL!	#NULL!	Supratentorial, Frontal Lobe	0	Headaches	7.90531	0	7.22086	0	7.80306	1	7.05643	1	8.93793	1	6.67464	0	5.39268	1	5.86446	0	0.270409	1	8.19682	0	8.82236	0	4.72256	1	4.93782	0	2.64187
286	Oligoastrocytoma	2	TCGA-HT-7879	0	3.68	0	3.68	0	#NULL!	0	31	1	2	60	1	0	#NULL!	#NULL!	#NULL!	Supratentorial, Temporal Lobe	0	Seizures	8.07533	1	7.85333	1	7.44902	1	7.28897	1	7.84868	0	6.92714	1	5.78065	1	6.61476	1	0.977499	1	8.02161	0	8.71883	0	4.36841	1	4.32109	0	1.29541
287	Oligoastrocytoma	2	TCGA-HT-7880	0	5.32	0	5.32	0	#NULL!	0	30	0	2	100	0	0	#NULL!	#NULL!	#NULL!	Supratentorial, Parietal Lobe	0	Seizures	7.82432	0	7.56063	1	7.4674	1	6.22788	0	8.76778	1	6.42094	0	5.55723	1	6.16741	0	0.668752	1	8.11756	0	8.65314	0	3.92182	0	4.74678	0	3.04392
288	Oligodendroglioma	1	TCGA-HT-7881	0	35.45	0	35.45	0	#NULL!	0	38	0	1	60	1	1	#NULL!	#NULL!	#NULL!	Supratentorial, Temporal Lobe	0	Seizures	7.70256	0	7.24296	0	7.71381	1	6.92422	1	8.57942	1	6.34191	0	5.41383	1	6.10176	0	0.856371	1	8.04706	0	8.71385	0	3.51182	0	6.4032	1	1.80494
289	Oligodendroglioma	4	TCGA-HT-7882	1	3.71	1	3.71	1	#NULL!	0	66	1	1	80	0	1	#NULL!	#NULL!	#NULL!	Supratentorial, Frontal Lobe	0	Seizures	8.18487	1	7.62679	1	6.67723	0	5.83069	0	7.65419	0	6.57857	0	4.30857	0	6.00212	0	0	0	8.69697	1	9.39233	1	1.72118	0	6.75906	1	5.98678
290	Astrocytoma	0	TCGA-HT-7884	0	11.27	0	11.27	0	#NULL!	1	44	0	0	80	1	1	#NULL!	1	#NULL!	Supratentorial, Frontal Lobe	0	Mental Status Changes	8.07513	1	8.06475	1	7.64537	1	6.90676	1	8.37601	1	6.72158	0	5.6585	1	6.23775	0	0	0	8.14993	0	8.657	0	4.21004	1	4.73454	0	2.77976
291	Oligoastrocytoma	2	TCGA-HT-7902	0	31.41	0	31.41	0	#NULL!	1	30	0	2	100	0	0	#NULL!	#NULL!	#NULL!	Supratentorial, Frontal Lobe	0	Visual Changes	7.88713	0	7.77053	1	7.01989	0	6.41264	0	8.52413	1	6.67402	0	5.17114	0	6.3106	1	1.02626	1	8.08764	0	8.76575	0	3.71335	0	4.57879	0	1.45461
292	Oligodendroglioma	1	TCGA-HT-8010	0	1.64	0	1.64	0	#NULL!	1	64	0	1	60	0	0	#NULL!	#NULL!	#NULL!	Supratentorial, Frontal Lobe	0	Motor/Movement Changes	7.9055	0	7.32679	0	7.36146	1	6.68225	1	8.87674	1	6.26196	0	6.18396	1	6.17974	0	0	0	8.09939	0	8.84889	1	3.80337	0	5.47465	1	4.00085
293	Astrocytoma	3	TCGA-HT-8011	0	16.23	1	9.13	1	#NULL!	0	55	1	0	80	1	0	#NULL!	#NULL!	#NULL!	Supratentorial, Temporal Lobe	0	Seizures	8.36986	1	7.93275	1	6.88157	0	7.18275	1	7.95661	0	6.714	0	5.31244	1	6.56709	1	3.24788	1	8.55284	1	9.16629	1	4.04935	0	5.16887	1	0.942192
294	Oligodendroglioma	1	TCGA-HT-8012	0	9.4	1	4.37	0	#NULL!	1	30	0	1	80	0	0	#NULL!	#NULL!	#NULL!	Supratentorial, Temporal Lobe	0	Seizures	8.06121	1	7.37428	0	7.748	1	6.90369	1	8.25536	0	6.9655	1	5.33738	1	6.22581	0	0.485508	1	8.27927	0	8.88854	1	4.7828	1	5.44377	1	1.89085
295	Oligoastrocytoma	2	TCGA-HT-8013	1	63.5	1	42.9	0	#NULL!	1	37	0	2	#NULL!	1	1	#NULL!	#NULL!	#NULL!	Supratentorial, Frontal Lobe	0	Seizures	8.07712	1	7.85709	1	7.18627	0	6.58905	0	8.21541	0	6.56859	0	4.87167	0	6.42833	1	0	0	8.33087	1	8.92685	1	4.56466	1	5.13368	1	2.07175
296	Astrocytoma	0	TCGA-HT-8015	0	0.1	0	0.1	0	#NULL!	0	21	0	0	60	#NULL!	1	#NULL!	#NULL!	#NULL!	Supratentorial, Temporal Lobe	0	[Not Available]	7.71169	0	7.54556	1	7.64605	1	7.07917	1	8.75412	1	6.17202	0	4.85403	0	5.79015	0	0	0	8.1645	0	8.7962	0	3.53418	0	5.02263	1	2.5631
297	Oligoastrocytoma	2	TCGA-HT-8018	1	37.84	1	37.84	0	#NULL!	1	40	0	2	80	1	1	#NULL!	#NULL!	#NULL!	Supratentorial, Temporal Lobe	0	Seizures	7.85021	0	7.33602	0	7.60077	1	6.82421	1	8.28155	0	6.39352	0	5.20844	0	5.94551	0	0.668137	1	8.29406	0	8.83447	1	3.29518	0	5.09904	1	2.51824
298	Oligodendroglioma	4	TCGA-HT-8019	0	32.98	0	32.98	1	#NULL!	1	34	1	1	80	1	0	#NULL!	#NULL!	#NULL!	Supratentorial, Frontal Lobe	0	Seizures	7.79448	0	7.19236	0	7.81408	1	6.3176	0	8.80236	1	6.14398	0	5.21703	0	5.70918	0	0.619393	1	8.02945	0	8.49209	0	3.0106	0	5.29832	1	3.77182
299	Astrocytoma	3	TCGA-HT-8104	0	12.22	0	12.22	1	#NULL!	1	51	1	0	80	#NULL!	1	#NULL!	#NULL!	#NULL!	Supratentorial, Frontal Lobe	0	Motor/Movement Changes	8.18504	1	8.10397	1	6.72511	0	6.61658	0	8.47434	1	6.63766	0	5.18933	0	6.58394	1	0.461341	1	8.48874	1	9.0932	1	3.18443	0	5.38261	1	0.461341
300	Oligodendroglioma	4	TCGA-HT-8105	0	6.24	0	6.24	1	#NULL!	0	54	1	1	100	1	0	#NULL!	#NULL!	#NULL!	Supratentorial, Frontal Lobe	0	Mental Status Changes	7.87244	0	7.37816	0	7.72871	1	6.83585	1	8.30994	1	6.48403	0	5.02943	0	5.91713	0	0	0	8.40344	1	8.80689	0	4.36056	1	4.58535	0	3.24534
301	Astrocytoma	3	TCGA-HT-8106	0	0.1	0	0.1	1	#NULL!	0	53	1	0	100	0	#NULL!	#NULL!	#NULL!	#NULL!	Supratentorial, Frontal Lobe	0	Seizures	7.88171	0	7.4437	0	6.65455	0	6.61139	0	7.98634	0	6.49094	0	4.09	0	5.99575	0	0	0	8.36292	1	9.11824	1	1.83753	0	5.10218	1	6.24141
302	Oligodendroglioma	1	TCGA-HT-8107	0	0.46	0	0.46	0	#NULL!	0	62	0	1	80	0	1	#NULL!	#NULL!	#NULL!	Supratentorial, Parietal Lobe	0	Mental Status Changes	7.66786	0	7.07877	0	8.1199	1	5.87964	0	8.90325	1	6.22528	0	5.10016	0	5.47638	0	0.297063	1	8.11101	0	8.77245	0	3.84295	0	5.2409	1	3.5325
303	Oligodendroglioma	1	TCGA-HT-8108	0	2.5	0	2.5	0	#NULL!	1	26	0	1	100	0	1	#NULL!	#NULL!	#NULL!	Supratentorial, Parietal Lobe	0	Headaches	8.17583	1	7.7827	1	7.63371	1	6.84888	1	8.41167	1	6.72392	0	5.41133	1	6.15873	0	0	0	8.43446	1	8.76332	0	4.87445	1	4.25746	0	0.558873
304	Oligodendroglioma	4	TCGA-HT-8109	0	5.55	0	5.55	1	#NULL!	0	64	1	1	60	1	0	#NULL!	#NULL!	#NULL!	Supratentorial, Frontal Lobe	0	Mental Status Changes	7.77118	0	7.02285	0	7.71307	1	6.85992	1	8.77245	1	6.28153	0	5.77606	1	5.75776	0	0	0	8.21375	0	8.9345	1	4.28962	1	5.59094	1	2.32927
305	Astrocytoma	3	TCGA-HT-8110	0	13.76	0	13.76	1	#NULL!	0	57	1	0	80	1	0	#NULL!	#NULL!	#NULL!	Supratentorial, Parietal Lobe	0	Visual Changes	7.66309	0	8.06555	1	6.74981	0	7.10977	1	8.41127	1	6.5101	0	5.45711	1	6.8395	1	0.75856	1	8.28327	0	9.14308	1	3.5351	0	4.72407	0	1.06195
306	Oligoastrocytoma	2	TCGA-HT-8111	0	0.23	0	0.23	0	#NULL!	0	32	1	2	80	0	1	#NULL!	#NULL!	#NULL!	Supratentorial, Frontal Lobe	0	Seizures	7.97814	0	7.31765	0	7.24413	0	6.60742	0	8.50916	1	6.58448	0	5.39291	1	6.46316	1	0.302768	1	8.34949	1	8.64581	0	3.83431	0	4.66697	0	1.94752
307	Oligodendroglioma	1	TCGA-HT-8113	0	29.57	0	29.57	0	#NULL!	1	49	0	1	#NULL!	1	1	#NULL!	#NULL!	#NULL!	Supratentorial, Frontal Lobe	0	Seizures	7.7181	0	7.25879	0	7.96812	1	6.46178	0	8.69112	1	6.24007	0	5.38414	1	5.61997	0	0	0	8.13356	0	8.64966	0	3.91471	0	5.04121	1	2.75623
308	Oligoastrocytoma	2	TCGA-HT-8114	0	34.17	0	34.17	0	#NULL!	0	36	1	2	80	1	1	#NULL!	#NULL!	#NULL!	Supratentorial, Parietal Lobe	0	Headaches	8.03524	1	7.55472	1	7.62655	1	6.49388	0	8.24627	0	6.47457	0	5.23138	1	6.29811	1	0	0	8.50575	1	9.32496	1	4.50696	1	4.53468	0	3.43017
309	Oligodendroglioma	1	TCGA-HT-8558	0	13.73	0	13.73	0	#NULL!	1	29	0	1	80	0	1	#NULL!	0	#NULL!	Supratentorial, Temporal Lobe	0	Seizures	7.58183	0	6.94396	0	8.02434	1	6.39773	0	8.36884	1	6.22409	0	4.87603	0	5.60645	0	0	0	8.08945	0	8.75231	0	3.80508	0	5.46181	1	3.13395
310	Astrocytoma	3	TCGA-HT-8563	0	28.25	0	28.25	1	#NULL!	1	30	1	0	60	1	0	#NULL!	0	#NULL!	Supratentorial, Frontal Lobe	0	Headaches	7.92601	0	7.20344	0	6.78196	0	6.64076	0	8.19246	0	6.29303	0	3.75199	0	6.02219	0	0	0	8.58595	1	9.19163	1	2.38144	0	5.76725	1	9.20844
311	Astrocytoma	3	TCGA-HT-8564	0	15.7	1	3.94	1	#NULL!	0	47	1	0	80	0	1	#NULL!	1	#NULL!	Supratentorial, Temporal Lobe	0	Mental Status Changes	7.68757	0	8.4297	1	7.3242	1	6.63406	0	8.98695	1	6.67953	0	5.83343	1	6.31141	1	1.55105	1	8.4577	1	9.09538	1	3.94961	0	5.55939	1	3.75242
312	Astrocytoma	3	TCGA-HT-A4DS	0	0.23	0	0.23	1	#NULL!	1	55	1	0	80	#NULL!	0	#NULL!	#NULL!	#NULL!	Supratentorial, Temporal Lobe	0	Seizures	7.86143	0	8.16319	1	5.49857	0	5.4282	0	7.14559	0	7.25254	1	3.59969	0	7.10127	1	0	0	8.1648	0	8.55548	0	1.99444	0	4.03816	0	4.39948
313	Oligodendroglioma	4	TCGA-HT-A4DV	0	26.02	0	26.02	1	#NULL!	1	51	1	1	90	1	1	#NULL!	1	#NULL!	Supratentorial, Frontal Lobe	0	Seizures	8.03223	1	7.32185	0	6.6958	0	6.50643	0	7.79491	0	6.73934	1	4.80513	0	6.35614	1	0	0	8.06394	0	8.34231	0	2.56495	0	4.62301	0	1.88707
314	Oligodendroglioma	1	TCGA-HT-A5R5	0	0.13	0	0.13	0	#NULL!	1	33	0	1	80	#NULL!	1	#NULL!	#NULL!	#NULL!	Supratentorial, Temporal Lobe	0	Seizures	8.05216	1	7.43101	0	7.13365	0	6.5222	0	8.7591	1	6.7592	1	5.03832	0	6.45516	1	0.414161	1	8.22474	0	8.84637	1	3.49077	0	7.1623	1	2.66307
315	Astrocytoma	3	TCGA-HT-A5R7	0	20.2	0	20.2	1	#NULL!	1	33	1	0	90	1	0	#NULL!	1	#NULL!	Supratentorial, Parietal Lobe	0	Seizures	7.8734	0	7.43308	0	7.55123	1	6.621	0	8.47927	1	6.3944	0	5.31356	1	6.06346	0	0.391231	1	8.03559	0	8.66877	0	3.32541	0	4.91973	0	2.82131
316	Oligodendroglioma	4	TCGA-HT-A5R9	0	0.07	0	0.07	1	#NULL!	1	48	1	1	80	#NULL!	0	#NULL!	#NULL!	#NULL!	Supratentorial, Frontal Lobe	0	Seizures	8.30471	1	7.34325	0	7.60679	1	6.8816	1	8.21532	0	7.00669	1	5.1149	0	5.90563	0	0.855394	1	8.3842	1	8.82747	0	4.10263	0	5.49698	1	2.81997
317	Astrocytoma	3	TCGA-HT-A5RA	0	27.33	0	27.33	1	#NULL!	1	65	1	0	70	1	0	#NULL!	1	#NULL!	Supratentorial, Temporal Lobe	0	Seizures	8.48263	1	8.32997	1	6.50207	0	6.60793	0	7.86435	0	6.67408	0	5.35233	1	6.62158	1	0	0	8.75944	1	8.90385	1	2.76469	0	5.40188	1	4.57584
318	Astrocytoma	0	TCGA-HT-A5RB	0	0.1	0	0.1	0	#NULL!	0	24	0	0	80	#NULL!	0	#NULL!	#NULL!	#NULL!	Supratentorial, Frontal Lobe	0	Seizures	8.02302	1	7.84381	1	7.66566	1	6.09108	0	8.64163	1	6.7143	0	5.73733	1	5.91137	0	0.672332	1	8.38375	1	8.91528	1	4.73738	1	5.00482	1	1.47149
319	Astrocytoma	3	TCGA-HT-A5RC	1	5.32	1	5.32	1	#NULL!	1	70	1	0	40	1	1	#NULL!	1	#NULL!	Supratentorial, Frontal Lobe	0	Mental Status Changes	8.07888	1	7.95155	1	6.8246	0	6.36667	0	8.55473	1	6.51039	0	4.87365	0	6.35936	1	2.30156	1	8.52387	1	8.87814	1	2.7333	0	4.95681	0	4.30766
320	Oligoastrocytoma	2	TCGA-HT-A614	0	2.69	0	2.69	0	#NULL!	0	47	0	2	80	#NULL!	0	#NULL!	#NULL!	#NULL!	Supratentorial, Not Otherwise Specified	0	Headaches	8.26748	1	7.7914	1	6.82321	0	6.90879	1	7.75695	0	6.82374	1	5.66104	1	6.63648	1	0.397231	1	8.00315	0	8.67545	0	3.30828	0	4.41813	0	1.36775
321	Oligodendroglioma	1	TCGA-HT-A615	0	16.92	0	16.92	0	#NULL!	1	38	0	1	90	1	1	#NULL!	0	#NULL!	Supratentorial, Temporal Lobe	0	Seizures	7.5093	0	7.15872	0	7.40086	1	6.50728	0	8.5582	1	6.62211	0	5.41431	1	6.13573	0	0	0	8.65212	1	8.87325	1	4.10095	0	5.09937	1	2.52214
322	Astrocytoma	0	TCGA-HT-A616	0	1.81	0	1.81	0	#NULL!	1	36	0	0	100	0	1	#NULL!	0	#NULL!	Supratentorial, Frontal Lobe	0	Seizures	7.95045	0	7.28951	0	7.37386	1	6.97613	1	8.38866	1	6.75601	1	5.53715	1	6.13262	0	0	0	8.43838	1	9.00034	1	3.63868	0	5.54314	1	3.09859
323	Oligodendroglioma	1	TCGA-HT-A617	0	16.13	1	12.98	0	#NULL!	0	47	0	1	60	#NULL!	0	#NULL!	#NULL!	#NULL!	Supratentorial, Not Otherwise Specified	0	Seizures	7.75942	0	8.03644	1	6.2965	0	5.65545	0	8.44675	1	6.78088	1	5.64558	1	6.16957	0	0.897516	1	8.35308	1	8.82865	0	3.03804	0	4.72237	0	5.09266
324	Astrocytoma	3	TCGA-HT-A618	0	16.82	0	16.82	1	#NULL!	1	37	1	0	80	0	#NULL!	#NULL!	1	#NULL!	Supratentorial, Temporal Lobe	0	Mental Status Changes	8.00821	0	7.61586	1	6.92322	0	7.25454	1	8.30641	1	6.37567	0	5.10112	0	6.33527	1	0.889413	1	8.38589	1	9.11945	1	3.34074	0	4.69577	0	1.0687
325	Oligodendroglioma	4	TCGA-HT-A619	0	21.39	0	21.39	1	#NULL!	1	51	1	1	80	0	1	#NULL!	1	#NULL!	Supratentorial, Frontal Lobe	#NULL!	Motor/Movement Changes	8.30129	1	7.2233	0	7.19991	0	6.66462	1	8.16266	0	7.14073	1	4.8643	0	5.90802	0	0	0	8.52067	1	8.6484	0	5.08309	1	4.11439	0	2.61571
326	Oligodendroglioma	1	TCGA-HT-A61A	0	6.37	0	6.37	0	#NULL!	1	20	0	1	80	1	1	#NULL!	1	#NULL!	Supratentorial, Temporal Lobe	0	Seizures	7.68305	0	7.14871	0	7.69963	1	7.12317	1	8.68056	1	6.27836	0	5.02073	0	5.8951	0	0	0	8.11968	0	8.77741	0	3.59269	0	5.30996	1	3.06001
327	Astrocytoma	3	TCGA-HT-A61B	0	17.51	0	17.51	1	#NULL!	0	22	1	0	80	1	1	#NULL!	1	#NULL!	Supratentorial, Temporal Lobe	0	Seizures	8.24598	1	7.57896	1	6.65912	0	6.60316	0	7.97605	0	6.87813	1	4.5801	0	6.78584	1	0.367417	1	8.54636	1	8.86591	1	2.66176	0	5.48391	1	1.51565
328	Oligodendroglioma	4	TCGA-HT-A61C	1	17.64	1	15.64	1	#NULL!	0	66	1	1	100	1	1	#NULL!	1	#NULL!	Supratentorial, Temporal Lobe	0	Motor/Movement Changes	8.11738	1	8.09474	1	6.45787	0	6.02845	0	7.49616	0	6.9431	1	5.10523	0	6.34882	1	0.579754	1	8.29981	0	8.74099	0	2.54816	0	5.06331	1	2.18106
329	Astrocytoma	3	TCGA-HT-A74H	0	2.43	0	2.43	1	#NULL!	0	62	1	0	40	1	1	#NULL!	1	#NULL!	Supratentorial, Temporal Lobe	0	Seizures	7.71097	0	7.42561	0	6.23264	0	6.80663	1	7.688	0	6.49939	0	5.28266	1	6.74577	1	0.695195	1	8.17884	0	8.8588	1	2.71191	0	4.70002	0	2.35511
330	Oligoastrocytoma	2	TCGA-HT-A74J	0	10.51	0	10.51	0	#NULL!	0	33	0	2	60	0	1	#NULL!	0	1	Supratentorial, Temporal Lobe	0	Seizures	8.18311	1	7.94576	1	7.3097	0	6.82094	1	8.11496	0	7.09551	1	5.6928	1	6.51228	1	0.623476	1	7.99218	0	8.74459	0	5.00387	1	4.93784	0	1.58809
331	Oligodendroglioma	4	TCGA-HT-A74K	0	15.34	0	15.34	1	#NULL!	1	58	1	1	60	1	0	#NULL!	1	#NULL!	Supratentorial, Frontal Lobe	0	Seizures	8.29312	1	7.56046	1	5.75273	0	6.48286	0	7.03022	0	7.19456	1	4.24435	0	6.50254	1	0	0	8.06626	0	8.497	0	2.75735	0	3.91195	0	5.52192
332	Oligoastrocytoma	2	TCGA-HT-A74L	0	11.04	0	11.04	0	#NULL!	1	22	0	2	90	#NULL!	0	#NULL!	#NULL!	1	Supratentorial, Parietal Lobe	0	Seizures	7.88669	0	7.15273	0	7.66173	1	7.28803	1	8.09731	0	6.67242	0	5.49301	1	5.99158	0	0	0	8.29238	0	8.69882	0	5.24007	1	5.34234	1	2.92117
333	Astrocytoma	3	TCGA-HT-A74O	0	0.1	0	0.1	1	#NULL!	0	34	1	0	80	#NULL!	1	#NULL!	#NULL!	#NULL!	Supratentorial, Temporal Lobe	0	Headaches	8.41265	1	7.75198	1	6.11069	0	6.57783	0	7.26525	0	7.22953	1	4.43322	0	6.79192	1	0.390554	1	8.14337	0	8.46917	0	2.44343	0	4.64644	0	1.35248
334	Oligodendroglioma	1	TCGA-HW-7486	0	56.54	0	56.54	0	#NULL!	0	37	0	1	60	0	0	#NULL!	#NULL!	#NULL!	Supratentorial, Frontal Lobe	0	[Not Available]	7.93745	0	7.15653	0	7.03248	0	6.82202	1	8.22088	0	6.67462	0	5.26991	1	6.21928	0	0	0	8.3281	1	8.93138	1	4.47403	1	5.11773	1	2.36037
335	Oligodendroglioma	1	TCGA-HW-7487	0	45.4	1	44.55	0	#NULL!	0	39	0	1	60	0	1	#NULL!	#NULL!	#NULL!	Supratentorial, Frontal Lobe	0	[Not Available]	7.71619	0	7.1193	0	7.788	1	6.57221	0	8.46793	1	6.40705	0	5.14332	0	5.83372	0	0	0	8.13311	0	8.79026	0	4.28149	1	4.81523	0	2.92376
336	Oligoastrocytoma	2	TCGA-HW-7489	1	41.46	1	41.46	0	#NULL!	0	38	0	2	60	0	0	#NULL!	#NULL!	1	Supratentorial, Frontal Lobe	0	[Not Available]	7.97428	0	7.3816	0	7.52383	1	6.74881	1	8.12042	0	6.7219	0	5.39914	1	6.14716	0	0	0	8.02499	0	8.74406	0	3.92773	0	4.94857	0	2.70322
337	Astrocytoma	0	TCGA-HW-7490	0	45.57	0	45.57	0	#NULL!	0	41	0	0	60	0	1	#NULL!	#NULL!	1	Supratentorial, Occipital Lobe	0	[Not Available]	8.0713	1	7.50557	0	7.16537	0	6.14695	0	8.25845	0	6.62305	0	4.869	0	6.45948	1	0	0	8.57621	1	8.81177	0	3.97601	0	4.28062	0	1.26152
338	Oligodendroglioma	1	TCGA-HW-7491	0	68.27	1	72.17	0	#NULL!	0	35	0	1	60	0	0	#NULL!	#NULL!	#NULL!	Supratentorial, Frontal Lobe	0	[Not Available]	8.04829	1	6.89019	0	7.85288	1	6.77342	1	8.77532	1	6.73054	1	5.18861	0	5.75023	0	0	0	8.47169	1	9.34265	1	4.65218	1	4.99145	0	4.2404
339	Astrocytoma	0	TCGA-HW-7493	0	69.22	0	69.22	0	#NULL!	1	40	0	0	80	1	0	#NULL!	#NULL!	#NULL!	Supratentorial, Temporal Lobe	0	[Not Available]	7.86601	0	7.18054	0	7.58434	1	6.52058	0	9.16219	1	6.04299	0	5.56031	1	6.32625	1	0.786045	1	8.42082	1	9.20773	1	4.23556	1	5.59774	1	2.31843
340	Oligodendroglioma	1	TCGA-HW-7495	0	35.41	0	35.41	0	#NULL!	1	45	0	1	80	0	0	#NULL!	#NULL!	#NULL!	Supratentorial, Frontal Lobe	0	[Not Available]	7.81458	0	6.99782	0	7.56429	1	7.01311	1	8.41342	1	6.46492	0	5.41241	1	6.04189	0	0.324761	1	8.15718	0	8.80131	0	4.30801	1	5.86395	1	2.3958
341	Astrocytoma	3	TCGA-HW-8319	1	39.72	1	32.75	1	#NULL!	1	34	1	0	80	1	1	#NULL!	1	#NULL!	Supratentorial, Frontal Lobe	0	[Not Available]	8.02509	1	7.6452	1	7.75792	1	7.09569	1	8.58872	1	6.56895	0	5.77237	1	6.25151	0	0.49048	1	8.40871	1	8.96179	1	4.98132	1	5.10196	1	1.50009
342	Astrocytoma	3	TCGA-HW-8320	0	39.98	0	39.98	1	#NULL!	0	36	1	0	80	1	0	#NULL!	1	#NULL!	Supratentorial, Parietal Lobe	0	[Not Available]	8.11467	1	7.77858	1	7.68724	1	6.61033	0	8.44118	1	6.8983	1	5.61916	1	6.47365	1	0	0	8.37128	1	8.87974	1	4.83568	1	4.88448	0	1.77478
343	Astrocytoma	0	TCGA-HW-8321	0	42.51	0	42.51	0	#NULL!	0	31	1	0	60	1	1	#NULL!	0	#NULL!	Supratentorial, Frontal Lobe	0	[Not Available]	8.03852	1	7.71366	1	7.53253	1	6.39195	0	8.26191	0	6.73058	1	5.31849	1	5.93037	0	0	0	8.41644	1	8.66335	0	4.94054	1	4.62158	0	1.18344
344	Oligodendroglioma	1	TCGA-HW-8322	0	24.9	0	24.9	0	#NULL!	0	39	0	1	60	0	1	#NULL!	0	#NULL!	Supratentorial, Frontal Lobe	0	[Not Available]	8.08474	1	7.37246	0	7.73138	1	7.01157	1	8.34531	1	6.82828	1	5.28514	1	6.06426	0	0	0	8.33043	1	8.8288	1	5.13122	1	6.12062	1	2.5402
345	Oligodendroglioma	4	TCGA-HW-A5KJ	1	31.6	1	20.2	1	#NULL!	0	68	1	1	#NULL!	1	0	#NULL!	1	#NULL!	Supratentorial, Frontal Lobe	0	[Not Available]	8.28405	1	7.3813	0	6.95534	0	5.97628	0	7.32	0	7.05026	1	4.75971	0	6.25792	0	0	0	8.48362	1	8.03641	0	3.10827	0	5.19855	1	1.94121
346	Astrocytoma	3	TCGA-HW-A5KK	1	12.75	1	12.75	1	#NULL!	0	64	1	0	80	1	0	#NULL!	1	#NULL!	Supratentorial, Temporal Lobe	0	[Not Available]	7.8077	0	7.76483	1	6.63121	0	5.93031	0	8.04764	0	6.75162	1	4.70433	0	6.0787	0	0	0	8.17422	0	8.86432	1	2.52678	0	5.58892	1	3.03191
347	Astrocytoma	0	TCGA-HW-A5KL	0	28.84	0	28.84	0	#NULL!	1	42	0	0	80	1	0	#NULL!	1	#NULL!	Supratentorial, Temporal Lobe	0	[Not Available]	8.24102	1	7.79679	1	7.4831	1	7.05225	1	8.32116	1	6.85367	1	5.51287	1	6.34408	1	0.383628	1	8.45113	1	8.95163	1	4.36457	1	4.36457	0	0.660159
348	Astrocytoma	0	TCGA-HW-A5KM	0	20.7	0	20.7	0	#NULL!	0	35	0	0	100	0	1	#NULL!	0	#NULL!	Supratentorial, Frontal Lobe	0	[Not Available]	8.19223	1	7.50288	0	7.10932	0	6.89903	1	7.82335	0	6.66064	0	4.62639	0	6.36248	1	0	0	8.50861	1	8.80986	0	4.62637	1	4.47746	0	1.07831
349	Oligodendroglioma	1	TCGA-IK-7675	1	18.99	1	4.04	0	#NULL!	0	43	0	1	90	1	0	#NULL!	#NULL!	#NULL!	Supratentorial, Frontal Lobe	0	Motor/Movement Changes	7.96067	0	7.66152	1	7.7576	1	7.20604	1	7.70178	0	6.8148	1	5.94583	1	6.57239	1	0.491643	1	7.89237	0	8.7064	0	4.27829	1	5.65746	1	0.669111
350	Oligoastrocytoma	2	TCGA-IK-8125	0	42.74	0	42.74	0	#NULL!	0	62	1	2	60	1	1	#NULL!	#NULL!	#NULL!	Supratentorial, Frontal Lobe	0	Seizures	7.8276	0	7.21096	0	7.66873	1	7.05467	1	8.84539	1	6.57393	0	5.18015	0	5.99157	0	0	0	8.28593	0	8.90023	1	4.70011	1	4.85577	0	2.2977
351	Oligoastrocytoma	2	TCGA-KT-A74X	0	14.39	0	14.39	0	#NULL!	0	26	1	2	90	1	1	#NULL!	1	1	Supratentorial, Parietal Lobe	0	Seizures	8.19957	1	7.10905	0	7.48067	1	6.68566	1	8.21118	0	6.95948	1	5.32521	1	6.18526	0	0	0	8.27496	0	8.97407	1	3.9638	0	4.96124	0	2.76778
352	Astrocytoma	3	TCGA-KT-A7W1	0	14.39	1	2.76	1	#NULL!	1	45	1	0	80	1	0	#NULL!	1	0	Supratentorial, Frontal Lobe	0	Seizures	8.61248	1	8.68982	1	8.87883	1	6.16299	0	8.17411	0	6.93022	1	4.62899	0	6.39606	1	1.37662	1	8.68209	1	9.14074	1	3.17947	0	5.4636	1	0.839928
353	Oligodendroglioma	1	TCGA-P5-A5ET	0	0	0	0	0	#NULL!	0	27	0	1	80	#NULL!	0	#NULL!	#NULL!	#NULL!	Supratentorial, Frontal Lobe	0	Headaches	8.11719	1	7.3293	0	7.09256	0	6.83057	1	8.2313	0	6.82735	1	5.6856	1	6.3892	1	0.582495	1	8.23896	0	8.75159	0	3.83847	0	5.3881	1	1.748
354	Astrocytoma	3	TCGA-P5-A5EU	0	0	0	0	1	#NULL!	0	35	1	0	60	0	0	#NULL!	0	#NULL!	Supratentorial, Frontal Lobe	0	Headaches	7.8156	0	7.84391	1	7.02009	0	6.63798	0	8.62774	1	7.06389	1	4.91315	0	6.49775	1	0.5615	1	8.61484	1	8.93191	1	4.10902	0	4.8661	0	4.28446
355	Astrocytoma	0	TCGA-P5-A5EV	0	0.23	0	0.23	0	#NULL!	0	39	0	0	60	#NULL!	1	#NULL!	0	#NULL!	Supratentorial, Temporal Lobe	0	Seizures	7.93943	0	7.04923	0	7.11483	0	6.37718	0	8.15179	0	6.87813	1	5.68048	1	6.73898	1	0.338328	1	8.36621	1	8.89498	1	3.99898	0	4.83788	0	1.61458
356	Astrocytoma	0	TCGA-P5-A5EW	0	6.7	0	6.7	0	#NULL!	1	20	0	0	80	#NULL!	0	#NULL!	#NULL!	#NULL!	Supratentorial, Frontal Lobe	0	Headaches	8.19049	1	7.60451	1	7.29123	0	6.56955	0	8.64918	1	6.87061	1	5.9321	1	6.44947	1	0	0	8.52486	1	9.06227	1	4.62512	1	5.48184	1	2.18221
357	Oligodendroglioma	4	TCGA-P5-A5EX	0	7.98	0	7.98	1	#NULL!	1	41	1	1	80	1	0	#NULL!	1	#NULL!	Supratentorial, Frontal Lobe	0	Headaches	7.64341	0	7.11894	0	6.63293	0	6.21605	0	8.22867	0	7.10063	1	4.62252	0	6.627	1	0	0	8.35421	1	8.96044	1	2.48224	0	4.12777	0	4.60229
358	Astrocytoma	0	TCGA-P5-A5EY	0	2.37	0	2.37	0	#NULL!	0	21	0	0	#NULL!	#NULL!	0	#NULL!	#NULL!	#NULL!	Supratentorial, Temporal Lobe	0	Seizures	8.06402	1	8.1949	1	7.13129	0	5.98557	0	9.19559	1	6.29398	0	5.08282	0	6.16719	0	0	0	8.24516	0	9.08944	1	2.72692	0	5.20187	1	1.7213
359	Astrocytoma	3	TCGA-P5-A5EZ	0	2.3	0	2.3	1	#NULL!	0	39	1	0	80	#NULL!	1	#NULL!	#NULL!	#NULL!	Supratentorial, Frontal Lobe	0	Seizures	7.73623	0	7.68651	1	7.31542	1	6.25672	0	8.02391	0	7.03143	1	5.25245	1	6.52048	1	0.388455	1	8.11153	0	8.90184	1	4.16092	1	4.90068	0	0.66747
360	Oligodendroglioma	1	TCGA-P5-A5F0	0	9.43	0	9.43	0	#NULL!	0	33	0	1	80	1	0	#NULL!	1	#NULL!	Supratentorial, Frontal Lobe	0	Seizures	7.93048	0	7.29865	0	7.41343	1	7.04667	1	8.63692	1	6.64099	0	5.14371	0	5.77759	0	0	0	8.16695	0	8.6449	0	4.80093	1	5.50477	1	2.35016
361	Astrocytoma	0	TCGA-P5-A5F1	0	5.88	0	5.88	0	#NULL!	0	30	0	0	80	#NULL!	1	#NULL!	#NULL!	#NULL!	Supratentorial, Temporal Lobe	0	Motor/Movement Changes	7.93225	0	7.51271	0	6.50119	0	6.69906	1	8.05125	0	6.59832	0	5.76015	1	6.96646	1	1.38005	1	8.27263	0	8.7529	0	2.24383	0	4.85541	0	2.73304
362	Astrocytoma	0	TCGA-P5-A5F2	0	7.95	0	7.95	0	#NULL!	1	36	0	0	80	0	0	#NULL!	1	#NULL!	Supratentorial, Frontal Lobe	0	Seizures	7.46936	0	7.78609	1	7.43107	1	6.03965	0	8.32837	1	6.63922	0	5.20601	0	6.527	1	0	0	8.3429	1	8.92425	1	3.3961	0	4.32444	0	1.67281
363	Oligodendroglioma	4	TCGA-P5-A5F4	0	7.59	0	7.59	1	#NULL!	1	35	1	1	70	1	0	#NULL!	1	#NULL!	Supratentorial, Temporal Lobe	0	Headaches	8.07443	1	7.6498	1	7.29999	0	6.64881	0	8.29236	1	6.68096	0	5.5957	1	6.10507	0	0	0	8.20772	0	8.63312	0	3.83981	0	5.38084	1	1.86594
364	Oligodendroglioma	1	TCGA-P5-A5F6	0	1.28	0	1.28	0	#NULL!	0	26	0	1	70	#NULL!	1	#NULL!	#NULL!	#NULL!	Supratentorial, Frontal Lobe	0	Headaches	8.2497	1	8.37738	1	6.64446	0	4.87984	0	7.42459	0	6.83166	1	5.04094	0	5.75005	0	0.472438	1	8.63139	1	8.39172	0	0	0	3.73916	0	2.24645
365	Oligodendroglioma	4	TCGA-P5-A72U	0	0.23	0	0.23	1	#NULL!	1	71	1	1	60	0	0	#NULL!	#NULL!	#NULL!	Supratentorial, Parietal Lobe	0	[Not Available]	8.49878	1	8.85905	1	6.19731	0	5.8332	0	7.97045	0	7.01788	1	5.42477	1	6.26163	0	0.408128	1	8.33322	1	9.10811	1	2.89796	0	5.57444	1	2.25848
366	Astrocytoma	3	TCGA-P5-A72W	0	10.41	0	10.41	1	#NULL!	0	35	1	0	#NULL!	1	1	#NULL!	#NULL!	#NULL!	Supratentorial, Frontal Lobe	0	[Not Available]	8.22311	1	7.68742	1	6.27022	0	6.1001	0	7.21709	0	7.28636	1	4.61285	0	7.06326	1	0	0	8.14367	0	8.12705	0	3.58176	0	4.76174	0	1.61951
367	Astrocytoma	3	TCGA-P5-A72X	0	13.24	0	13.24	1	#NULL!	0	21	1	0	#NULL!	1	1	#NULL!	#NULL!	#NULL!	Supratentorial, Temporal Lobe	0	[Not Available]	8.22372	1	7.88343	1	7.33575	1	6.37045	0	8.28193	0	6.96904	1	5.95783	1	6.66835	1	0.386282	1	7.98153	0	8.87502	1	4.45822	1	5.27182	1	1.82229
368	Oligodendroglioma	4	TCGA-P5-A72Z	0	11.63	0	11.63	1	#NULL!	1	64	1	1	#NULL!	1	1	#NULL!	#NULL!	#NULL!	Supratentorial, Temporal Lobe	0	[Not Available]	8.29059	1	7.41125	0	7.75478	1	7.46266	1	8.18561	0	7.38191	1	4.83035	0	5.85785	0	0	0	8.15749	0	8.62585	0	5.34038	1	4.17489	0	1.49124
369	Oligoastrocytoma	2	TCGA-P5-A730	0	10.94	0	10.94	0	#NULL!	0	22	1	2	#NULL!	0	0	#NULL!	#NULL!	#NULL!	Supratentorial, Occipital Lobe	0	[Not Available]	7.92093	0	7.05431	0	7.3053	0	5.99945	0	7.92248	0	6.70047	0	4.75895	0	6.23194	0	0	0	8.46411	1	8.71258	0	4.33821	1	4.59899	0	2.39617
370	Oligoastrocytoma	2	TCGA-P5-A731	0	9	0	9	0	#NULL!	1	59	0	2	90	1	0	#NULL!	#NULL!	#NULL!	Supratentorial, Frontal Lobe	0	[Not Available]	8.02799	1	7.58536	1	7.04602	0	6.29694	0	8.1654	0	6.53744	0	5.53535	1	6.58977	1	0.844494	1	8.15529	0	8.86092	1	3.33146	0	5.47254	1	3.10142
371	Astrocytoma	0	TCGA-P5-A733	0	13.6	0	13.6	0	#NULL!	1	52	0	0	#NULL!	1	1	#NULL!	#NULL!	#NULL!	Supratentorial, Frontal Lobe	0	[Not Available]	8.01731	0	7.62912	1	7.13745	0	6.87897	1	8.41779	1	6.6042	0	5.44428	1	6.51415	1	0.396693	1	8.43959	1	8.81485	0	3.39209	0	4.54847	0	1.08103
372	Astrocytoma	0	TCGA-P5-A735	0	9.59	0	9.59	0	#NULL!	1	38	0	0	#NULL!	0	1	#NULL!	#NULL!	#NULL!	Supratentorial, Temporal Lobe	0	[Not Available]	8.27548	1	7.86568	1	7.03137	0	6.53079	0	7.81388	0	7.38156	1	5.28635	1	6.67532	1	0	0	8.22707	0	8.76703	0	3.98624	0	4.65923	0	2.06608
373	Astrocytoma	3	TCGA-P5-A736	0	7.56	0	7.56	1	#NULL!	1	44	1	0	#NULL!	1	0	#NULL!	#NULL!	#NULL!	Supratentorial, Parietal Lobe	0	[Not Available]	8.1057	1	7.61542	1	6.8377	0	6.42043	0	8.16349	0	6.86984	1	5.59973	1	6.90931	1	0.440639	1	8.08986	0	8.69931	0	3.41268	0	5.91438	1	3.87256
374	Oligoastrocytoma	2	TCGA-P5-A737	0	12.22	0	12.22	0	#NULL!	0	47	0	2	#NULL!	0	0	#NULL!	#NULL!	#NULL!	Supratentorial, Frontal Lobe	0	[Not Available]	8.39037	1	7.29757	0	7.30721	0	6.5669	0	8.3376	1	7.17136	1	5.71198	1	6.36051	1	0	0	8.0353	0	8.85102	1	4.75714	1	6.09117	1	1.49347
375	Oligoastrocytoma	2	TCGA-P5-A77W	0	19.19	0	19.19	0	#NULL!	1	37	1	2	#NULL!	0	1	#NULL!	#NULL!	#NULL!	Supratentorial, Frontal Lobe	0	[Not Available]	8.12594	1	7.00479	0	7.49357	1	6.41202	0	8.20076	0	7.10377	1	4.71676	0	6.00382	0	0	0	8.49709	1	8.44115	0	4.48804	1	4.56039	0	3.201
376	Oligoastrocytoma	2	TCGA-P5-A77X	0	3.45	0	3.45	0	#NULL!	1	55	0	2	#NULL!	1	0	#NULL!	#NULL!	#NULL!	Supratentorial, Frontal Lobe	0	[Not Available]	7.2764	0	7.17836	0	7.27555	0	6.60034	0	8.91191	1	6.48193	0	5.50266	1	6.69417	1	0.342099	1	8.196	0	8.53877	0	4.21194	1	4.5302	0	2.80337
377	Astrocytoma	3	TCGA-P5-A780	0	2.37	0	2.37	1	#NULL!	1	44	1	0	#NULL!	1	0	#NULL!	#NULL!	#NULL!	Supratentorial, Temporal Lobe	0	[Not Available]	7.93779	0	7.82022	1	7.35065	1	6.52501	0	8.18482	0	6.97768	1	4.94795	0	5.91015	0	0	0	8.392	1	8.68083	0	4.16856	1	4.41373	0	2.0328
378	Astrocytoma	3	TCGA-P5-A781	0	4.4	0	4.4	1	#NULL!	1	34	1	0	#NULL!	1	0	#NULL!	#NULL!	#NULL!	Supratentorial, Temporal Lobe	0	[Not Available]	7.84529	0	7.10078	0	7.21315	0	6.8972	1	8.55046	1	6.66366	0	5.87355	1	6.47804	1	0	0	8.17391	0	8.74843	0	4.28659	1	6.05072	1	2.47989
379	Oligodendroglioma	4	TCGA-QH-A65R	0	15.14	0	15.14	1	#NULL!	1	38	1	1	100	1	1	#NULL!	1	1	Supratentorial, Frontal Lobe	0	[Not Available]	8.15296	1	7.25881	0	7.18933	0	6.23852	0	7.95743	0	7.07652	1	5.16619	0	6.16977	0	0.346847	1	8.38857	1	8.71986	0	3.51907	0	5.20952	1	2.59807
380	Oligoastrocytoma	2	TCGA-QH-A65S	0	2.53	0	2.53	0	#NULL!	1	32	0	2	90	0	1	#NULL!	0	1	Supratentorial, Frontal Lobe	0	Seizures	8.20005	1	7.5863	1	6.61937	0	6.91199	1	7.89117	0	6.73999	1	5.13833	0	6.80139	1	0	0	8.2569	0	8.9232	1	3.08227	0	4.66592	0	1.23779
381	Oligodendroglioma	1	TCGA-QH-A65V	0	12.61	0	12.61	0	#NULL!	1	43	0	1	90	0	0	#NULL!	1	1	Supratentorial, Temporal Lobe	0	Seizures	7.91465	0	6.93825	0	6.71891	0	6.69435	1	7.88807	0	6.63508	0	4.99716	0	6.48906	1	0.388997	1	8.302	0	8.58885	0	2.92283	0	5.42646	1	3.28382
382	Oligoastrocytoma	2	TCGA-QH-A65X	0	15.83	0	15.83	0	#NULL!	1	28	1	2	90	1	0	#NULL!	1	0	Supratentorial, Frontal Lobe	0	Seizures	8.34381	1	7.36492	0	5.54005	0	6.1326	0	6.77957	0	7.47095	1	4.116	0	6.51797	1	0	0	8.09865	0	8.54609	0	3.20819	0	3.46942	0	2.53397
383	Oligodendroglioma	1	TCGA-QH-A65Z	0	14.03	0	14.03	0	#NULL!	0	54	0	1	90	1	0	#NULL!	1	1	Supratentorial, Frontal Lobe	0	Seizures	8.0743	1	7.10594	0	6.96605	0	6.91991	1	8.27532	0	6.82686	1	5.11588	0	6.26787	0	0.362766	1	8.31966	1	8.20711	0	3.68677	0	5.04286	1	1.50363
384	Astrocytoma	3	TCGA-QH-A6CS	0	19.32	1	16.36	1	#NULL!	0	41	1	0	90	1	0	#NULL!	1	0	Supratentorial, Frontal Lobe	0	Seizures	7.84593	0	7.7272	1	5.88042	0	5.44101	0	8.07437	0	6.48814	0	5.81264	1	6.37246	1	0.412043	1	8.61134	1	9.06592	1	2.62094	0	5.08847	1	3.95114
385	Oligodendroglioma	4	TCGA-QH-A6CU	0	14.82	0	14.82	1	#NULL!	1	52	1	1	90	1	1	#NULL!	0	1	Supratentorial, Frontal Lobe	0	Seizures	7.98968	0	7.05246	0	5.91936	0	6.34291	0	7.65974	0	6.69993	0	5.70826	1	6.84869	1	1.33036	1	8.15834	0	8.56551	0	1.17121	0	6.14704	1	1.46762
386	Oligoastrocytoma	2	TCGA-QH-A6CV	0	14.52	0	14.52	0	#NULL!	0	51	1	2	90	1	0	#NULL!	0	1	Supratentorial, Frontal Lobe	0	Headaches	7.97991	0	8.61042	1	6.13667	0	5.70164	0	7.90233	0	6.8346	1	5.20523	0	6.71824	1	1.07977	1	8.75058	1	8.58072	0	2.21538	0	4.52999	0	4.43324
387	Oligoastrocytoma	2	TCGA-QH-A6CW	0	13.6	0	13.6	0	#NULL!	0	43	1	2	90	0	0	#NULL!	0	1	Supratentorial, Temporal Lobe	0	Seizures	8.28042	1	7.97607	1	6.73659	0	6.64601	0	8.00501	0	7.27103	1	5.59151	1	6.55496	1	0.69893	1	8.2877	0	8.84188	1	4.66064	1	5.05814	1	2.6134
388	Astrocytoma	0	TCGA-QH-A6CX	1	12.22	1	8.97	0	#NULL!	0	66	0	0	90	1	1	#NULL!	0	0	Supratentorial, Temporal Lobe	0	Seizures	8.2721	1	7.89821	1	5.9785	0	6.21112	0	7.95299	0	6.69074	0	4.62374	0	6.70272	1	0	0	8.1832	0	8.58376	0	2.5454	0	5.27365	1	1.59252
389	Oligoastrocytoma	2	TCGA-QH-A6CY	0	13.4	0	13.4	0	#NULL!	0	38	1	2	90	1	0	#NULL!	0	1	Supratentorial, Frontal Lobe	0	Headaches	7.74717	0	6.9922	0	7.40661	1	6.79372	1	8.48866	1	6.48824	0	5.22878	1	6.07962	0	0	0	8.26838	0	8.63591	0	3.93192	0	5.31509	1	1.93241
390	Oligoastrocytoma	2	TCGA-QH-A6CZ	0	9.17	0	9.17	0	#NULL!	0	38	0	2	90	0	0	#NULL!	0	1	Supratentorial, Frontal Lobe	0	Seizures	7.46046	0	7.00618	0	7.64829	1	6.58609	0	8.69175	1	6.4986	0	5.02034	0	6.18971	0	0	0	8.22853	0	9.02984	1	4.72028	1	4.41529	0	3.0411
391	Oligoastrocytoma	2	TCGA-QH-A6X3	0	10.28	0	10.28	0	#NULL!	0	27	0	2	90	0	0	#NULL!	0	1	Supratentorial, Parietal Lobe	0	Seizures	7.89486	0	7.53482	1	7.42403	1	6.79146	1	8.29845	1	6.62693	0	5.43339	1	6.33725	1	0	0	8.50598	1	8.73434	0	4.11381	0	4.2321	0	1.14231
392	Oligoastrocytoma	2	TCGA-QH-A6X4	0	14.52	0	14.52	0	#NULL!	0	47	1	2	90	1	1	#NULL!	1	1	Supratentorial, Temporal Lobe	0	Sensory Changes	7.79211	0	7.56569	1	7.08887	0	6.9986	1	7.81419	0	7.25481	1	5.11252	0	6.33166	1	0	0	7.92066	0	8.61466	0	3.69201	0	4.37262	0	1.96533
393	Oligoastrocytoma	2	TCGA-QH-A6X5	0	16.33	0	16.33	0	#NULL!	1	58	0	2	90	0	1	#NULL!	0	1	Supratentorial, Frontal Lobe	0	Seizures	8.03361	1	7.19709	0	7.04979	0	7.03523	1	7.86664	0	6.77355	1	5.64388	1	6.4314	1	0.391231	1	8.12371	0	8.60543	0	3.76441	0	5.07203	1	1.83535
394	Oligodendroglioma	4	TCGA-QH-A6X8	0	16.72	0	16.72	1	#NULL!	1	56	1	1	100	1	1	#NULL!	1	1	Supratentorial, Frontal Lobe	0	Mental Status Changes	8.34036	1	7.64574	1	7.24346	0	6.93701	1	8.16628	0	7.29274	1	5.54075	1	6.12815	0	0	0	8.15219	0	9.0912	1	4.65036	1	5.44016	1	2.09758
395	Oligodendroglioma	1	TCGA-QH-A6X9	0	1.91	0	1.91	0	#NULL!	1	73	0	1	40	0	0	#NULL!	#NULL!	1	Supratentorial, Temporal Lobe	0	Seizures	8.13946	1	7.7186	1	7.68702	1	7.14587	1	8.48509	1	6.68546	0	5.32084	1	5.99092	0	0.334685	1	8.49106	1	8.4471	0	4.82518	1	4.6088	0	1.8192
396	Oligoastrocytoma	2	TCGA-QH-A6XA	0	16.49	0	16.49	0	#NULL!	1	23	0	2	100	0	1	#NULL!	#NULL!	1	Supratentorial, Frontal Lobe	0	[Not Available]	8.03727	1	7.58614	1	7.1807	0	6.75248	1	8.31775	1	6.82764	1	5.47807	1	6.51895	1	0.637264	1	8.37257	1	8.77799	0	4.204	1	4.48124	0	2.75404
397	Astrocytoma	3	TCGA-QH-A6XC	0	16.69	1	14.39	1	#NULL!	0	48	1	0	70	1	0	#NULL!	1	0	Supratentorial, Frontal Lobe	0	Seizures	8.22994	1	8.05767	1	6.45447	0	6.00087	0	7.53103	0	6.98614	1	4.82277	0	6.46323	1	0.822727	1	8.11972	0	8.38882	0	2.10837	0	5.02999	1	2.15876
398	Oligodendroglioma	1	TCGA-QH-A86X	0	11.07	0	11.07	0	#NULL!	0	33	0	1	100	0	1	#NULL!	0	1	Supratentorial, Frontal Lobe	0	Seizures	8.19349	1	7.40931	0	7.38055	1	7.25823	1	8.31951	1	6.68543	0	5.42552	1	6.21813	0	0	0	8.28796	0	8.86712	1	4.64742	1	5.13557	1	2.62041
399	Oligoastrocytoma	2	TCGA-QH-A870	0	12.98	1	11.01	0	#NULL!	1	38	1	2	80	0	0	#NULL!	0	1	Supratentorial, Occipital Lobe	0	Headaches	7.50511	0	7.46126	0	7.21461	0	6.42068	0	8.00597	0	6.67202	0	5.59359	1	6.78428	1	0.631857	1	8.32893	1	8.86007	1	4.08749	0	4.97405	0	2.40984
400	Oligodendroglioma	1	TCGA-R8-A6MK	0	88.76	0	88.76	0	#NULL!	0	40	0	1	#NULL!	0	0	#NULL!	1	#NULL!	Supratentorial, Frontal Lobe	0	[Not Available]	7.94132	0	7.05084	0	7.26987	0	6.64592	0	8.45983	1	6.66736	0	5.28488	1	6.48398	1	0	0	8.23026	0	8.67005	0	4.05463	0	4.94921	0	2.53149
401	Oligodendroglioma	4	TCGA-R8-A6ML	0	93.96	0	93.96	1	#NULL!	0	52	1	1	80	1	1	#NULL!	1	#NULL!	Supratentorial, Frontal Lobe	#NULL!	[Not Available]	7.92482	0	7.09727	0	7.42507	1	7.15104	1	7.99918	0	6.77311	1	5.13109	0	6.3353	1	0.316124	1	8.33008	1	8.80049	0	4.48999	1	4.33214	0	2.40143
402	Oligodendroglioma	1	TCGA-R8-A6MO	0	32.62	0	32.62	0	#NULL!	1	53	0	1	#NULL!	0	0	#NULL!	0	#NULL!	Supratentorial, Frontal Lobe	0	[Not Available]	8.0665	1	7.41189	0	7.21536	0	6.8516	1	7.63411	0	6.95084	1	4.89225	0	6.31039	1	0	0	8.34978	1	8.60854	0	3.50696	0	4.12764	0	3.51607
403	Oligodendroglioma	1	TCGA-R8-A73M	0	59.33	0	59.33	0	#NULL!	1	48	0	1	#NULL!	0	1	#NULL!	1	#NULL!	Supratentorial, Parietal Lobe	0	[Not Available]	8.23155	1	7.26693	0	6.01305	0	6.81863	1	7.5466	0	7.22103	1	4.87191	0	6.62861	1	0	0	8.22909	0	8.71149	0	2.5631	0	4.41467	0	2.88342
404	Oligodendroglioma	1	TCGA-RY-A83X	0	30.85	0	30.85	0	#NULL!	1	46	0	1	#NULL!	0	0	#NULL!	0	1	Supratentorial, Frontal Lobe	0	Mental Status Changes	8.009	0	7.21105	0	7.18389	0	7.31997	1	8.23234	0	6.90617	1	5.34398	1	6.29811	1	0.692547	1	8.32139	1	8.79554	0	4.14191	0	4.46083	0	1.29836
405	Oligodendroglioma	1	TCGA-RY-A83Y	0	5.45	0	5.45	0	#NULL!	0	45	0	1	80	0	1	#NULL!	#NULL!	1	Supratentorial, Parietal Lobe	0	Seizures	8.20579	1	7.34108	0	6.54003	0	6.77825	1	7.53304	0	6.89409	1	4.92084	0	6.37306	1	0.419105	1	8.27777	0	8.66616	0	2.90025	0	4.46468	0	1.64181
406	Astrocytoma	3	TCGA-RY-A83Z	0	9.89	0	9.89	1	#NULL!	1	54	1	0	80	1	1	#NULL!	1	1	Supratentorial, Frontal Lobe	0	Seizures	7.81803	0	7.3631	0	6.5717	0	7.09295	1	7.08028	0	7.28879	1	4.76253	0	6.927	1	0	0	7.76771	0	8.59249	0	2.71144	0	4.53619	0	1.70773
407	Oligodendroglioma	4	TCGA-RY-A840	0	28.06	0	28.06	1	#NULL!	0	47	1	1	90	0	1	#NULL!	1	1	Supratentorial, Temporal Lobe	0	Seizures	7.59617	0	7.23446	0	6.56817	0	6.50831	0	7.94338	0	7.04174	1	6.34222	1	6.79799	1	0	0	8.155	0	8.55371	0	3.8397	0	3.5739	0	1.86066
408	Astrocytoma	3	TCGA-RY-A843	0	2.07	0	2.07	1	#NULL!	0	30	1	0	100	0	1	#NULL!	1	0	Supratentorial, Temporal Lobe	0	Seizures	8.12496	1	7.80851	1	7.36961	1	6.36752	0	8.39632	1	6.54602	0	5.52676	1	6.17216	0	0.569849	1	8.32539	1	8.78053	0	4.05094	0	4.38339	0	3.68353
409	Oligoastrocytoma	2	TCGA-RY-A845	0	19.58	0	19.58	0	#NULL!	1	40	0	2	80	0	1	#NULL!	0	0	Supratentorial, Parietal Lobe	0	Mental Status Changes	8.01681	0	7.70955	1	7.28394	0	6.76428	1	8.05418	0	6.85003	1	5.17621	0	6.39481	1	0	0	8.30805	0	8.83114	1	4.66351	1	4.6325	0	1.79751
410	Oligodendroglioma	1	TCGA-RY-A847	0	30.65	0	30.65	0	#NULL!	0	45	0	1	90	0	0	#NULL!	0	1	Supratentorial, Frontal Lobe	0	[Not Available]	7.98493	0	7.0156	0	7.26134	0	6.65215	0	8.47037	1	6.62521	0	5.66274	1	6.32618	1	0.403663	1	8.28844	0	8.63702	0	4.17665	1	5.44127	1	1.94121
411	Astrocytoma	3	TCGA-S9-A6TS	1	62.12	1	43.5	1	#NULL!	1	48	1	0	100	1	0	#NULL!	0	#NULL!	Supratentorial, Frontal Lobe	0	[Not Available]	7.87145	0	7.9383	1	7.11678	0	6.78149	1	7.80288	0	6.72716	0	5.56633	1	6.31288	1	0	0	8.16256	0	8.83184	1	4.00354	0	4.13881	0	1.6881
412	Astrocytoma	0	TCGA-S9-A6TU	0	87.06	1	87.06	0	#NULL!	0	38	0	0	100	0	1	#NULL!	0	1	Supratentorial, Temporal Lobe	0	Sensory Changes	8.2305	1	7.9557	1	7.13255	0	6.26706	0	7.5524	0	7.08371	1	5.02018	0	6.31758	1	0	0	8.03931	0	8.45081	0	4.29698	1	4.3287	0	1.21447
413	Oligoastrocytoma	2	TCGA-S9-A6TV	0	18.76	0	18.76	0	#NULL!	0	50	1	2	90	1	0	#NULL!	1	1	Supratentorial, Frontal Lobe	0	Headaches	8.12462	1	7.32665	0	6.84635	0	7.22059	1	8.41024	1	7.08154	1	4.87171	0	6.49149	1	0	0	7.73554	0	9.01147	1	2.05868	0	5.55785	1	4.84194
414	Oligodendroglioma	4	TCGA-S9-A6TW	0	41.06	1	28.29	1	#NULL!	0	40	1	1	90	0	1	#NULL!	1	1	Supratentorial, Frontal Lobe	0	Motor/Movement Changes	8.0905	1	7.36398	0	6.9624	0	6.53799	0	7.95023	0	6.75358	1	4.95658	0	6.17223	0	0	0	8.32705	1	8.86203	1	3.40107	0	4.14971	0	3.35067
415	Oligodendroglioma	4	TCGA-S9-A6TX	0	40.9	1	28.12	1	#NULL!	0	46	1	1	100	0	1	#NULL!	1	1	Supratentorial, Temporal Lobe	0	Headaches	8.11929	1	7.46331	0	7.15748	0	6.44454	0	7.82649	0	7.12998	1	5.39863	1	6.26752	0	0	0	8.02937	0	8.54223	0	4.6738	1	5.42555	1	3.00837
416	Oligodendroglioma	1	TCGA-S9-A6TY	0	35.35	0	35.35	0	#NULL!	0	50	0	1	100	0	1	#NULL!	1	0	Supratentorial, Temporal Lobe	0	Seizures	7.85326	0	7.28143	0	7.28618	0	6.47391	0	8.35753	1	6.78126	1	5.01475	0	6.02407	0	0.594597	1	8.17657	0	8.58513	0	4.63424	1	5.49839	1	1.44678
417	Astrocytoma	0	TCGA-S9-A6TZ	0	36.79	1	18.13	0	#NULL!	1	39	0	0	100	0	1	#NULL!	0	1	Supratentorial, Frontal Lobe	0	Mental Status Changes	7.86059	0	7.78715	1	7.60877	1	5.86848	0	8.45669	1	6.52002	0	5.59529	1	6.26299	0	0.400788	1	8.38993	1	8.94753	1	4.71336	1	5.98792	1	1.49308
418	Astrocytoma	3	TCGA-S9-A6U0	1	24.38	1	22.73	1	#NULL!	0	46	1	0	100	1	0	#NULL!	1	0	Supratentorial, Temporal Lobe	0	Seizures	8.37653	1	7.44913	0	6.77726	0	6.8622	1	7.62462	0	6.9403	1	5.31453	1	6.75838	1	1.95785	1	8.31279	0	9.30448	1	2.80255	0	5.04545	1	1.69098
419	Astrocytoma	3	TCGA-S9-A6U1	0	25.79	0	25.79	1	#NULL!	1	22	1	0	100	0	0	#NULL!	1	0	Supratentorial, Frontal Lobe	0	Sensory Changes	8.16484	1	7.74063	1	7.39654	1	6.68211	1	8.24509	0	6.87926	1	5.44719	1	6.40752	1	0	0	8.41625	1	9.09086	1	4.66177	1	4.35059	0	1.75489
420	Oligodendroglioma	1	TCGA-S9-A6U2	0	29.83	0	29.83	0	#NULL!	1	48	0	1	100	1	0	#NULL!	0	1	Supratentorial, Frontal Lobe	0	Seizures	7.96236	0	7.22474	0	7.48436	1	7.0305	1	8.67767	1	6.86428	1	5.86916	1	6.19439	0	0.387505	1	8.26172	0	9.12146	1	4.85443	1	5.37901	1	0.666033
421	Astrocytoma	0	TCGA-S9-A6U5	0	32.59	0	32.59	0	#NULL!	0	33	0	0	100	0	0	#NULL!	0	1	Supratentorial, Temporal Lobe	0	Seizures	8.01441	0	7.12374	0	7.0515	0	7.13954	1	8.28933	1	6.7134	0	5.39834	1	6.48543	1	0	0	8.2747	0	8.66788	0	4.42219	1	5.3742	1	1.26175
422	Astrocytoma	3	TCGA-S9-A6U6	0	35.12	0	35.12	1	#NULL!	0	28	1	0	100	1	1	#NULL!	0	1	Supratentorial, Temporal Lobe	0	[Not Available]	8.2685	1	7.86579	1	7.36389	1	6.64778	0	8.0676	0	6.90444	1	5.41833	1	6.2568	0	0.337329	1	8.32228	1	8.74869	0	4.19554	1	5.25096	1	1.82698
423	Astrocytoma	0	TCGA-S9-A6U8	1	98.16	1	12.06	0	#NULL!	0	24	0	0	100	0	1	#NULL!	0	#NULL!	Supratentorial, Temporal Lobe	0	Seizures	8.03462	1	7.72099	1	7.23021	0	6.54427	0	8.2711	0	6.82044	1	5.43739	1	6.46129	1	0.53883	1	8.32747	1	8.96667	1	4.22648	1	4.92275	0	2.22044
424	Astrocytoma	3	TCGA-S9-A6U9	0	95.86	0	95.86	1	#NULL!	0	36	1	0	80	1	0	#NULL!	0	#NULL!	Supratentorial, Frontal Lobe	0	Seizures	8.07558	1	7.80115	1	6.98475	0	6.22121	0	7.84117	0	6.85078	1	5.6516	1	6.5932	1	0	0	8.13776	0	8.79716	0	3.74823	0	5.56175	1	2.21842
425	Astrocytoma	3	TCGA-S9-A6UA	1	5.85	1	5.29	1	#NULL!	0	66	1	0	60	0	0	#NULL!	0	#NULL!	Supratentorial, Temporal Lobe	0	Mental Status Changes	8.1998	1	7.87193	1	7.11146	0	5.90792	0	7.56464	0	6.56012	0	4.54735	0	5.96128	0	0.54151	1	8.37906	1	9.3985	1	2.7783	0	4.94462	0	6.03332
426	Oligodendroglioma	1	TCGA-S9-A6UB	0	123.55	0	123.55	0	#NULL!	0	52	0	1	100	0	0	#NULL!	0	#NULL!	Supratentorial, Frontal Lobe	0	[Not Available]	8.05168	1	7.26322	0	7.5067	1	7.16763	1	8.13067	0	7.09138	1	5.09088	0	6.10483	0	0.837118	1	8.40029	1	8.80367	0	4.51013	1	4.86253	0	3.04843
427	Oligodendroglioma	4	TCGA-S9-A6WD	0	75.2	0	75.2	1	#NULL!	0	58	1	1	100	0	1	#NULL!	1	#NULL!	Supratentorial, Parietal Lobe	0	Seizures	7.54396	0	7.17984	0	7.1516	0	6.35781	0	8.33227	1	6.89512	1	5.34652	1	6.30811	1	0.344086	1	8.19522	0	8.74195	0	4.48734	1	4.6212	0	1.96854
428	Oligodendroglioma	1	TCGA-S9-A6WE	0	135.12	0	135.12	0	#NULL!	0	34	0	1	100	0	0	#NULL!	1	#NULL!	Supratentorial, Frontal Lobe	0	Sensory Changes	8.08512	1	6.79799	0	7.61347	1	6.94806	1	7.91492	0	6.76276	1	5.17869	0	6.26448	0	0	0	8.3648	1	8.98722	1	4.41663	1	5.08721	1	1.85544
429	Astrocytoma	3	TCGA-S9-A6WG	0	85.48	0	85.48	1	#NULL!	0	31	1	0	100	1	0	#NULL!	1	#NULL!	Supratentorial, Frontal Lobe	0	Seizures	8.21207	1	7.81814	1	7.42817	1	6.20993	0	7.92488	0	6.6786	0	5.90825	1	6.75999	1	0	0	8.35733	1	9.01701	1	3.35008	0	5.75366	1	2.69141
430	Oligoastrocytoma	2	TCGA-S9-A6WH	0	38.53	0	38.53	0	#NULL!	1	73	0	2	80	1	0	#NULL!	0	1	Supratentorial, Temporal Lobe	0	Motor/Movement Changes	8.09327	1	7.2796	0	7.52842	1	6.43543	0	7.69653	0	7.41656	1	4.78388	0	5.86387	0	0	0	8.32657	1	8.7189	0	4.03965	0	4.94531	0	3.60152
431	Oligoastrocytoma	2	TCGA-S9-A6WI	0	84.92	0	84.92	0	#NULL!	1	56	0	2	100	1	0	#NULL!	0	#NULL!	Supratentorial, Frontal Lobe	0	Headaches	7.75885	0	7.03798	0	7.77111	1	6.18861	0	8.34034	1	6.42148	0	5.02313	0	5.71886	0	0	0	8.08792	0	8.67829	0	3.74694	0	5.22971	1	2.87332
432	Astrocytoma	3	TCGA-S9-A6WL	0	31.08	1	7.88	1	#NULL!	0	52	1	0	100	0	0	#NULL!	0	1	Supratentorial, Frontal Lobe	0	Seizures	8.04502	1	7.3963	0	7.4955	1	6.78992	1	8.60981	1	6.6247	0	5.2119	0	5.98612	0	0	0	8.24558	0	8.77665	0	3.52378	0	5.08174	1	3.60053
433	Astrocytoma	3	TCGA-S9-A6WM	0	19.84	1	16.59	1	#NULL!	1	59	1	0	90	1	1	#NULL!	1	0	Supratentorial, Temporal Lobe	0	Headaches	8.42949	1	8.04052	1	6.4094	0	6.66711	1	8.03634	0	6.8509	1	5.35206	1	6.80695	1	4.12501	1	8.2655	0	8.93977	1	0.961646	0	5.69099	1	0.430938
434	Astrocytoma	3	TCGA-S9-A6WN	0	26.45	1	26.45	1	#NULL!	1	38	1	0	90	1	1	#NULL!	1	0	Supratentorial, Frontal Lobe	0	Seizures	8.12832	1	6.72188	0	6.51173	0	6.25774	0	8.38299	1	6.12352	0	4.607	0	5.89905	0	0	0	8.4929	1	9.7354	1	2.78881	0	4.70677	0	1.06736
435	Astrocytoma	0	TCGA-S9-A6WO	0	18.59	1	6.14	0	#NULL!	0	29	0	0	100	0	1	#NULL!	0	1	Supratentorial, Frontal Lobe	0	Seizures	8.1327	1	7.77944	1	7.51274	1	6.59553	0	8.32529	1	6.86055	1	5.47582	1	6.4786	1	0	0	8.33194	1	9.01429	1	4.58035	1	4.41992	0	2.18932
436	Oligoastrocytoma	2	TCGA-S9-A6WP	0	18.63	0	18.63	0	#NULL!	0	42	1	2	100	0	0	#NULL!	1	1	Supratentorial, Frontal Lobe	0	Seizures	7.74691	0	7.67246	1	7.08382	0	6.43456	0	8.19934	0	6.95701	1	4.91543	0	6.15428	0	0.298696	1	8.19396	0	8.77921	0	3.67979	0	4.72197	0	2.46732
437	Oligoastrocytoma	2	TCGA-S9-A6WQ	0	14.06	0	14.06	0	#NULL!	1	57	0	2	100	0	1	#NULL!	0	1	Supratentorial, Frontal Lobe	0	Seizures	8.03731	1	7.70102	1	6.74809	0	6.53051	0	7.85327	0	6.78947	1	5.15163	0	6.34283	1	0	0	8.32552	1	8.62007	0	3.47848	0	4.69947	0	2.04134
438	Oligoastrocytoma	2	TCGA-S9-A7IQ	0	36.1	0	36.1	0	#NULL!	1	45	0	2	100	0	1	#NULL!	0	1	Supratentorial, Frontal Lobe	0	Sensory Changes	7.86079	0	7.09809	0	7.79881	1	6.64519	0	8.44413	1	6.44139	0	5.29627	1	5.74477	0	0.703642	1	8.01438	0	8.74052	0	3.95882	0	5.16243	1	3.29093
439	Astrocytoma	3	TCGA-S9-A7IS	1	7.92	1	7.92	1	#NULL!	1	33	1	0	60	1	0	#NULL!	0	#NULL!	Supratentorial, Frontal Lobe	0	Mental Status Changes	8.37384	1	8.27438	1	7.45404	1	5.58829	0	7.79675	0	7.15557	1	4.43043	0	5.47295	0	0	0	8.50479	1	9.04307	1	3.38244	0	5.09619	1	2.91412
440	Astrocytoma	3	TCGA-S9-A7IX	1	26.91	1	22.31	1	#NULL!	0	57	1	0	100	1	0	#NULL!	0	#NULL!	Supratentorial, Temporal Lobe	0	Motor/Movement Changes	7.85333	0	7.87989	1	6.91118	0	6.24933	0	8.32906	1	6.65047	0	5.04075	0	6.02302	0	1.07953	1	8.34911	1	8.98172	1	3.00118	0	5.16437	1	1.96764
441	Oligoastrocytoma	2	TCGA-S9-A7IY	0	23.49	0	23.49	0	#NULL!	0	39	1	2	80	1	0	#NULL!	1	1	Supratentorial, Frontal Lobe	0	Motor/Movement Changes	8.05685	1	7.28896	0	7.20189	0	6.51696	0	8.49756	1	6.67447	0	5.43156	1	6.4435	1	0	0	8.22007	0	8.76492	0	3.79546	0	5.60512	1	2.02131
442	Astrocytoma	3	TCGA-S9-A7IZ	0	19.97	1	15.34	1	#NULL!	1	48	1	0	90	1	1	#NULL!	0	1	Supratentorial, Frontal Lobe	0	Seizures	7.46762	0	7.65191	1	7.17954	0	6.61627	0	8.3036	1	6.30904	0	4.90728	0	6.48214	1	0.360886	1	8.28842	0	8.74016	0	4.29252	1	3.48826	0	1.59164
443	Oligodendroglioma	4	TCGA-S9-A7J0	0	20.01	1	12.81	1	#NULL!	1	30	1	1	100	1	0	#NULL!	1	0	Supratentorial, Frontal Lobe	0	Seizures	8.4122	1	8.15761	1	8.28193	1	7.36247	1	8.11963	0	7.01724	1	4.87045	0	5.81879	0	0.494086	1	8.07261	0	8.36733	0	3.97774	0	5.09559	1	4.1275
444	Oligodendroglioma	1	TCGA-S9-A7J1	0	8.18	0	8.18	0	#NULL!	0	43	0	1	60	0	0	#NULL!	0	1	Supratentorial, Temporal Lobe	0	Seizures	7.94575	0	7.20647	0	7.36657	1	7.07276	1	8.65479	1	6.59621	0	5.39859	1	6.12376	0	0.929483	1	8.29978	0	8.72244	0	4.60661	1	4.72668	0	2.15938
445	Oligodendroglioma	4	TCGA-S9-A7J2	0	2.04	0	2.04	1	#NULL!	0	25	1	1	80	0	1	#NULL!	1	1	Supratentorial, Frontal Lobe	0	Mental Status Changes	8.11873	1	7.17376	0	7.55752	1	6.94927	1	8.82626	1	6.96688	1	5.37455	1	6.10815	0	0	0	8.38595	1	8.81121	0	5.26278	1	5.62617	1	0.925845
446	Oligodendroglioma	4	TCGA-S9-A7J3	0	20.66	0	20.66	1	#NULL!	1	52	1	1	100	1	1	#NULL!	1	1	Supratentorial, Parietal Lobe	0	Seizures	8.07265	1	7.2929	0	7.72428	1	7.02151	1	8.41096	1	6.9187	1	5.49658	1	5.81966	0	0	0	8.22193	0	8.86329	1	4.61334	1	4.92674	0	2.7144
447	Astrocytoma	3	TCGA-S9-A7QW	0	15.05	1	12.55	1	#NULL!	1	54	1	0	100	1	1	#NULL!	0	1	Supratentorial, Frontal Lobe	0	[Not Available]	8.17018	1	7.806	1	6.79529	0	6.68108	1	8.01126	0	7.23707	1	4.72369	0	6.61229	1	0	0	8.31892	1	8.77866	0	4.2181	1	4.87461	0	1.15
448	Astrocytoma	3	TCGA-S9-A7QX	0	18.53	0	18.53	1	#NULL!	1	36	1	0	100	1	0	#NULL!	1	1	Supratentorial, Temporal Lobe	0	Sensory Changes	8.26709	1	7.78817	1	7.39806	1	6.63546	0	8.04043	0	7.12031	1	5.18479	0	6.34007	1	0	0	8.25519	0	8.71514	0	4.41835	1	3.85109	0	0.37871
449	Oligoastrocytoma	2	TCGA-S9-A7QY	0	28.35	0	28.35	0	#NULL!	1	35	0	2	100	0	1	#NULL!	1	0	Supratentorial, Frontal Lobe	0	Seizures	8.07681	1	7.52187	0	6.99534	0	6.72515	1	8.18878	0	6.95618	1	5.60968	1	6.25796	0	0.608787	1	8.13718	0	8.78792	0	3.58921	0	5.92091	1	2.3244
450	Oligodendroglioma	1	TCGA-S9-A7QZ	0	27.14	1	25.43	0	#NULL!	0	41	0	1	100	0	1	#NULL!	0	1	Supratentorial, Frontal Lobe	0	Seizures	7.98774	0	7.60546	1	7.69425	1	6.85785	1	8.28441	1	6.8783	1	5.14015	0	5.95767	0	0.33067	1	8.24352	0	8.92663	1	4.65632	1	4.88203	0	2.48269
451	Oligodendroglioma	1	TCGA-S9-A7R1	1	169.71	1	119.48	0	#NULL!	0	35	0	1	90	1	#NULL!	#NULL!	0	#NULL!	Supratentorial, Frontal Lobe	0	Seizures	8.0858	1	7.02418	0	7.24798	0	6.77714	1	8.23292	0	6.82668	1	5.40587	1	6.04241	0	0	0	8.26508	0	8.64375	0	4.8368	1	6.07497	1	2.0472
452	Astrocytoma	3	TCGA-S9-A7R2	1	10.38	1	10.38	1	#NULL!	0	69	1	0	90	1	1	#NULL!	0	#NULL!	Supratentorial, Temporal Lobe	0	Seizures	7.68103	0	7.43743	0	6.63519	0	6.51882	0	7.98133	0	6.76912	1	4.92035	0	6.54956	1	2.37018	1	8.20006	0	8.89019	1	3.62094	0	4.87127	0	2.17014
453	Astrocytoma	0	TCGA-S9-A7R3	0	98.98	1	31.87	0	#NULL!	1	28	0	0	100	0	1	#NULL!	0	#NULL!	Supratentorial, Frontal Lobe	0	Headaches	7.59265	0	7.35109	0	7.32717	1	6.45467	0	8.13831	0	6.59251	0	5.15454	0	6.61089	1	0	0	8.32225	1	9.16609	1	3.69581	0	4.55153	0	4.37028
454	Astrocytoma	3	TCGA-S9-A7R4	0	30.03	0	30.03	1	#NULL!	0	46	1	0	90	1	1	#NULL!	1	1	Supratentorial, Frontal Lobe	0	Seizures	8.05231	1	7.57057	1	7.53166	1	6.45326	0	8.16953	0	6.73287	1	5.25756	1	6.22655	0	0	0	8.45112	1	8.85078	1	4.31168	1	4.41819	0	0.658142
455	Astrocytoma	0	TCGA-S9-A7R7	0	98.55	1	95.07	0	#NULL!	0	27	0	0	80	1	1	#NULL!	0	1	Supratentorial, Frontal Lobe	0	Seizures	8.16826	1	7.49324	0	6.93514	0	6.7751	1	7.88183	0	6.27495	0	4.21161	0	6.3925	1	1.17239	1	8.52528	1	9.14079	1	3.23971	0	5.10859	1	6.88907
456	Astrocytoma	3	TCGA-S9-A7R8	1	31.57	1	22.93	1	#NULL!	1	44	1	0	90	1	0	#NULL!	0	#NULL!	Supratentorial, Frontal Lobe	0	Seizures	7.62354	0	7.31499	0	7.49881	1	6.00884	0	7.88766	0	6.88095	1	4.18235	0	6.08535	0	0	0	8.44268	1	8.55354	0	4.59651	1	4.01676	0	0.939108
457	Astrocytoma	3	TCGA-S9-A89V	0	18.69	1	7.26	1	#NULL!	0	70	1	0	80	1	0	#NULL!	1	0	Posterior Fossa, Cerebellum	0	Motor/Movement Changes	7.76082	0	8.52795	1	7.72395	1	6.46561	0	8.36631	1	6.58723	0	5.30202	1	5.82633	0	0	0	8.38852	1	8.6932	0	4.76622	1	5.55713	1	2.67842
458	Astrocytoma	3	TCGA-S9-A89Z	0	20.47	0	20.47	1	#NULL!	0	40	1	0	70	1	0	#NULL!	1	1	Supratentorial, Frontal Lobe	0	Seizures	8.21584	1	7.74442	1	6.96091	0	6.63103	0	7.91789	0	7.11259	1	4.71488	0	6.39523	1	0.391028	1	8.34706	1	8.92559	1	3.28979	0	4.92611	0	4.49443
459	Astrocytoma	3	TCGA-TM-A7C3	1	54.73	1	43.46	1	#NULL!	1	43	1	0	90	0	1	#NULL!	0	0	Supratentorial, Temporal Lobe	0	Seizures	8.06142	1	8.3751	1	6.66783	0	7.12336	1	8.49587	1	6.47378	0	5.27592	1	6.74432	1	1.40933	1	8.72792	1	8.62175	0	2.1415	0	6.31841	1	1.51185
460	Astrocytoma	0	TCGA-TM-A7C4	0	48.29	0	48.29	0	#NULL!	1	39	0	0	90	0	0	#NULL!	0	#NULL!	Supratentorial, Temporal Lobe	0	Seizures	7.98986	0	7.56045	1	7.49041	1	6.8216	1	8.69855	1	6.6354	0	5.32898	1	6.32146	1	0.396492	1	8.18382	0	8.79261	0	3.92464	0	5.34364	1	1.9227
461	Oligoastrocytoma	2	TCGA-TM-A7C5	0	49.28	0	49.28	0	#NULL!	0	30	0	2	100	0	1	#NULL!	0	#NULL!	Supratentorial, Parietal Lobe	0	Seizures	8.1472	1	7.12221	0	7.60284	1	6.79357	1	8.42504	1	6.93995	1	4.92961	0	6.11143	0	0	0	8.33774	1	9.07564	1	4.36761	1	5.24482	1	2.13972
462	Astrocytoma	0	TCGA-TM-A7CA	0	34.76	0	34.76	0	#NULL!	0	44	0	0	100	0	1	#NULL!	0	#NULL!	Supratentorial, Frontal Lobe	0	Seizures	8.14202	1	7.7785	1	7.51981	1	6.68003	1	8.31082	1	7.01754	1	5.10291	0	6.25433	0	0	0	8.45994	1	8.72314	0	5.03905	1	4.71068	0	2.84138
463	Astrocytoma	0	TCGA-TM-A7CF	0	65.34	1	30.35	0	#NULL!	1	41	0	0	100	1	0	#NULL!	0	#NULL!	Supratentorial, Frontal Lobe	0	Seizures	7.96852	0	7.29258	0	7.5697	1	6.63041	0	8.71878	1	6.7872	1	5.68306	1	6.14174	0	0.439544	1	8.01937	0	8.64151	0	5.18905	1	5.2774	1	1.68938
464	Astrocytoma	3	TCGA-TM-A84B	1	24.9	1	24.9	1	#NULL!	0	40	1	0	90	0	1	#NULL!	1	0	Supratentorial, Parietal Lobe	0	Seizures	8.28194	1	7.31937	0	6.85724	0	7.07545	1	8.87311	1	6.86419	1	5.42191	1	5.86459	0	0.919087	1	8.24931	0	9.17133	1	4.52207	1	6.10275	1	1.46221
465	Astrocytoma	0	TCGA-TM-A84C	1	16.16	1	16.16	0	#NULL!	0	32	0	0	80	0	#NULL!	#NULL!	1	0	Posterior Fossa, Brain Stem	0	Visual Changes	8.53147	1	7.98625	1	7.09879	0	5.79786	0	7.92453	0	6.71244	0	4.3296	0	6.27376	0	0	0	8.6683	1	9.115	1	2.87694	0	4.70625	0	5.11081
466	Astrocytoma	3	TCGA-TM-A84F	0	59	0	59	1	#NULL!	0	48	1	0	100	1	0	#NULL!	0	#NULL!	Supratentorial, Frontal Lobe	0	Visual Changes	8.05528	1	7.77386	1	6.44511	0	6.90418	1	8.24512	0	6.56095	0	6.03548	1	6.54997	1	0	0	8.31486	0	8.83904	1	2.85112	0	4.8985	0	1.91492
467	Oligodendroglioma	4	TCGA-TM-A84G	0	40.6	0	40.6	1	#NULL!	1	54	1	1	100	1	0	#NULL!	0	#NULL!	Supratentorial, Frontal Lobe	0	Headaches	8.2744	1	7.47285	0	7.3553	1	7.07709	1	8.11626	0	6.8908	1	5.19587	0	5.85992	0	0	0	8.44855	1	8.96	1	4.97145	1	4.80923	0	3.4071
468	Oligoastrocytoma	2	TCGA-TM-A84H	0	30.42	0	30.42	0	#NULL!	1	44	1	2	90	1	0	#NULL!	0	#NULL!	Supratentorial, Frontal Lobe	0	Headaches	8.08446	1	7.90755	1	7.81622	1	6.62639	0	8.25887	0	6.8605	1	6.15179	1	6.34673	1	0	0	8.16427	0	8.32269	0	4.92802	1	5.06294	1	2.61703
469	Astrocytoma	3	TCGA-TM-A84I	0	28.06	0	28.06	1	#NULL!	0	30	1	0	90	1	1	#NULL!	0	#NULL!	Supratentorial, Parietal Lobe	0	Motor/Movement Changes	7.80463	0	7.90071	1	7.53128	1	6.83734	1	7.64798	0	6.56487	0	4.93314	0	6.36617	1	3.01898	1	8.1057	0	8.98381	1	5.01934	1	4.84551	0	1.31531
470	Oligodendroglioma	4	TCGA-TM-A84J	0	24.15	1	14.91	1	#NULL!	0	63	1	1	80	1	1	#NULL!	1	#NULL!	Supratentorial, Occipital Lobe	0	Visual Changes	9.24052	1	7.95682	1	7.45263	1	7.09642	1	8.10032	0	6.87872	1	5.18797	0	5.87526	0	0.981629	1	8.64965	1	9.2621	1	4.39568	1	6.44458	1	2.03797
471	Oligoastrocytoma	2	TCGA-TM-A84L	1	40.8	1	34.33	0	#NULL!	0	31	0	2	90	0	1	#NULL!	0	#NULL!	Supratentorial, Temporal Lobe	0	Seizures	8.05405	1	7.78983	1	7.15199	0	6.79914	1	8.3481	1	6.72131	0	5.68706	1	6.55845	1	0.393325	1	8.24174	0	8.91868	1	3.80343	0	4.5934	0	2.67372
472	Oligodendroglioma	4	TCGA-TM-A84M	0	24.77	0	24.77	1	#NULL!	0	40	1	1	100	1	0	#NULL!	1	#NULL!	Supratentorial, Frontal Lobe	0	Motor/Movement Changes	7.93513	0	7.28039	0	7.55203	1	7.14434	1	8.47902	1	6.78202	1	5.80959	1	5.96482	0	0	0	8.21704	0	8.57883	0	5.24743	1	6.07537	1	2.22729
473	Oligodendroglioma	4	TCGA-TM-A84O	1	33.21	1	33.21	1	#NULL!	1	61	1	1	90	1	0	#NULL!	0	#NULL!	Supratentorial, Not Otherwise Specified	0	Seizures	8.01457	0	7.06217	0	7.48094	1	6.60276	0	8.61983	1	6.61241	0	5.37324	1	6.38722	1	0	0	8.33942	1	8.8184	0	4.28485	1	4.53868	0	4.0914
474	Astrocytoma	0	TCGA-TM-A84Q	0	25.36	1	14.95	0	#NULL!	0	31	0	0	80	1	1	#NULL!	0	#NULL!	Supratentorial, Temporal Lobe	0	Mental Status Changes	8.04265	1	7.59827	1	7.23452	0	6.32727	0	8.29003	1	6.84087	1	4.91773	0	6.44088	1	0	0	8.44304	1	8.83602	1	4.40231	1	4.91675	0	4.46821
475	Oligodendroglioma	1	TCGA-TM-A84R	0	18.59	0	18.59	0	#NULL!	0	46	0	1	80	0	1	#NULL!	0	0	Supratentorial, Frontal Lobe	0	Seizures	7.68474	0	7.00287	0	7.86868	1	6.48759	0	8.71519	1	6.25908	0	5.26984	1	5.75008	0	0	0	8.15722	0	8.72376	0	4.17616	1	5.4899	1	3.48606
476	Oligodendroglioma	4	TCGA-TM-A84S	0	14.91	0	14.91	1	#NULL!	0	36	1	1	80	0	1	#NULL!	0	1	Supratentorial, Frontal Lobe	0	Seizures	7.97956	0	7.05443	0	6.937	0	7.1716	1	8.51397	1	6.60294	0	6.01563	1	6.63765	1	0.645374	1	8.21755	0	8.85476	1	4.1231	0	5.85299	1	1.99429
477	Oligoastrocytoma	2	TCGA-TM-A84T	0	23.78	0	23.78	0	#NULL!	0	19	0	2	90	0	1	#NULL!	0	1	Supratentorial, Frontal Lobe	0	Seizures	8.21512	1	7.70477	1	7.54615	1	6.58164	0	8.27971	0	7.00872	1	5.62966	1	6.31614	1	0	0	8.44244	1	8.87315	1	4.47913	1	4.22955	0	0.871628
478	Oligodendroglioma	4	TCGA-TQ-A7RF	0	21.35	0	21.35	1	#NULL!	1	27	1	1	#NULL!	1	0	#NULL!	1	#NULL!	Supratentorial, Temporal Lobe	0	Headaches	7.41203	0	7.81575	1	6.65217	0	5.28696	0	8.24043	0	6.88457	1	5.04377	0	6.6905	1	0	0	8.27206	0	8.81824	0	3.58902	0	4.97641	0	2.94709
479	Oligoastrocytoma	2	TCGA-TQ-A7RG	0	19.68	0	19.68	0	#NULL!	0	36	0	2	100	0	1	#NULL!	1	#NULL!	Supratentorial, Temporal Lobe	0	Seizures	8.01026	0	7.17407	0	7.42743	1	7.40598	1	8.30116	1	6.55606	0	5.62167	1	6.32631	1	0.685065	1	8.30701	0	8.82607	0	4.80417	1	4.91113	0	3.20329
480	Oligoastrocytoma	2	TCGA-TQ-A7RH	0	15.97	0	15.97	0	#NULL!	0	39	0	2	#NULL!	1	0	#NULL!	1	#NULL!	Supratentorial, Temporal Lobe	0	Seizures	8.09096	1	7.63917	1	7.20972	0	6.65614	1	8.19057	0	6.87624	1	5.31638	1	6.4756	1	0.566733	1	8.22496	0	8.64596	0	4.59876	1	5.41517	1	4.63641
481	Oligodendroglioma	1	TCGA-TQ-A7RI	0	2.04	0	2.04	0	#NULL!	1	37	0	1	#NULL!	0	1	#NULL!	0	#NULL!	Supratentorial, Parietal Lobe	0	Seizures	7.97693	0	7.34467	0	7.29012	0	7.21412	1	8.1801	0	6.67032	0	5.3406	1	6.08763	0	0.811641	1	8.25723	0	8.74313	0	5.03765	1	5.55614	1	2.96302
482	Oligoastrocytoma	2	TCGA-TQ-A7RJ	0	40.37	0	40.37	0	#NULL!	1	25	0	2	80	1	1	#NULL!	1	#NULL!	Supratentorial, Parietal Lobe	0	Sensory Changes	8.17601	1	7.86002	1	7.46596	1	6.75137	1	7.99119	0	6.87979	1	5.43871	1	6.498	1	0	0	8.24808	0	8.92035	1	4.53832	1	4.99206	0	3.51628
483	Oligoastrocytoma	2	TCGA-TQ-A7RK	0	44.05	1	28.19	0	#NULL!	0	29	0	2	90	0	1	#NULL!	0	#NULL!	Supratentorial, Frontal Lobe	0	Mental Status Changes	8.19996	1	7.95946	1	7.31067	1	6.66996	1	7.96435	0	6.9789	1	5.51123	1	6.60604	1	0.629355	1	8.29222	0	8.56269	0	3.9975	0	4.81785	0	2.55192
484	Oligoastrocytoma	2	TCGA-TQ-A7RM	0	36.66	0	36.66	0	#NULL!	1	41	1	2	90	1	1	#NULL!	1	#NULL!	Supratentorial, Temporal Lobe	0	Seizures	8.08901	1	7.55252	1	7.80054	1	7.12451	1	8.30529	1	6.9413	1	5.15897	0	6.20638	0	2.93357	1	7.71166	0	8.78798	0	4.46502	1	4.57565	0	1.96024
485	Oligodendroglioma	1	TCGA-TQ-A7RN	0	33.71	0	33.71	0	#NULL!	0	32	0	1	100	1	1	#NULL!	1	#NULL!	Supratentorial, Temporal Lobe	0	Headaches	8.00597	0	7.41317	0	7.48121	1	6.90659	1	8.59923	1	7.01094	1	5.8263	1	6.24777	0	0.488089	1	8.23388	0	8.9875	1	4.87706	1	5.2687	1	0.945073
486	Oligoastrocytoma	2	TCGA-TQ-A7RO	0	31.18	0	31.18	0	#NULL!	0	29	0	2	100	0	1	#NULL!	0	#NULL!	Supratentorial, Temporal Lobe	0	Seizures	8.05483	1	7.05642	0	7.61888	1	7.1383	1	8.60534	1	6.52767	0	5.62339	1	5.91526	0	0.373286	1	8.31501	0	9.05573	1	4.87416	1	5.0037	1	2.21319
487	Oligoastrocytoma	2	TCGA-TQ-A7RP	0	30.03	0	30.03	0	#NULL!	0	66	0	2	90	1	1	#NULL!	1	#NULL!	Supratentorial, Temporal Lobe	0	Seizures	7.95109	0	7.87067	1	6.59218	0	6.46101	0	8.12745	0	6.61452	0	5.34722	1	6.53365	1	0	0	8.29173	0	9.03224	1	2.88173	0	4.81174	0	3.80542
488	Oligodendroglioma	1	TCGA-TQ-A7RQ	0	26.12	0	26.12	0	#NULL!	1	38	0	1	90	0	1	#NULL!	1	#NULL!	Supratentorial, Temporal Lobe	0	Seizures	8.02698	1	7.27999	0	7.80384	1	6.90483	1	8.34793	1	6.75167	1	4.91398	0	5.8006	0	0	0	8.2201	0	8.83589	1	5.38362	1	5.6299	1	3.91957
489	Oligoastrocytoma	2	TCGA-TQ-A7RR	0	25.85	0	25.85	0	#NULL!	0	38	0	2	100	1	0	#NULL!	1	#NULL!	Supratentorial, Parietal Lobe	0	Seizures	7.86724	0	7.98854	1	7.11648	0	7.0955	1	8.27181	0	6.4427	0	5.324	1	6.16419	0	0.356135	1	8.20652	0	8.75138	0	3.60908	0	4.98661	0	1.66347
490	Oligodendroglioma	1	TCGA-TQ-A7RS	0	0.03	0	0.03	0	#NULL!	1	25	0	1	90	0	1	#NULL!	0	#NULL!	Supratentorial, Frontal Lobe	0	Motor/Movement Changes	8.20903	1	7.34829	0	7.32685	1	6.93033	1	7.75517	0	6.98504	1	5.16029	0	6.11033	0	0.321286	1	8.21284	0	8.70117	0	4.07049	0	4.96598	0	1.84117
491	Oligodendroglioma	1	TCGA-TQ-A7RU	0	33.9	0	33.9	0	#NULL!	0	51	0	1	80	0	1	#NULL!	0	#NULL!	Supratentorial, Temporal Lobe	0	Seizures	8.29956	1	7.29258	0	7.46202	1	6.74248	1	8.04301	0	7.01956	1	5.20868	0	6.38187	1	0	0	8.28551	0	9.13246	1	4.06704	0	5.11693	1	2.9951
492	Astrocytoma	0	TCGA-TQ-A7RV	0	61.37	1	17.41	0	#NULL!	0	27	0	0	80	0	1	#NULL!	0	#NULL!	Supratentorial, Temporal Lobe	0	Sensory Changes	7.99528	0	7.93343	1	7.3867	1	6.60084	0	8.17879	0	6.85114	1	5.56371	1	6.46218	1	0.567414	1	8.34337	1	8.8	0	4.159	1	3.97622	0	1.84784
493	Oligodendroglioma	1	TCGA-TQ-A7RW	1	26.97	1	16.79	0	#NULL!	0	32	0	1	90	1	1	#NULL!	1	#NULL!	Supratentorial, Temporal Lobe	0	Seizures	7.89719	0	7.44118	0	7.31839	1	6.99368	1	8.03729	0	6.81704	1	5.10506	0	6.23575	0	0.406331	1	8.29818	0	8.8029	0	4.27913	1	4.36557	0	3.79794
494	Oligodendroglioma	1	TCGA-TQ-A8XE	1	31.34	1	14.95	0	#NULL!	1	42	0	1	70	0	1	#NULL!	0	#NULL!	Supratentorial, Temporal Lobe	0	Headaches	7.59387	0	7.28041	0	7.49821	1	6.73061	1	7.8584	0	6.95554	1	4.88354	0	6.37753	1	0.311887	1	8.39259	1	8.87137	1	4.25106	1	3.73756	0	1.04035
495	Oligodendroglioma	1	TCGA-VM-A8C8	0	45.89	1	14.98	0	#NULL!	1	50	0	1	90	1	0	#NULL!	0	1	Supratentorial, Temporal Lobe	0	Motor/Movement Changes	8.00839	0	7.68679	1	6.83852	0	6.66858	1	7.8312	0	6.67897	0	4.94047	0	6.66191	1	0.712263	1	8.29715	0	8.46989	0	2.92614	0	3.92889	0	1.27993
496	Astrocytoma	0	TCGA-VM-A8C9	0	43.17	0	43.17	0	#NULL!	1	37	0	0	#NULL!	0	1	#NULL!	0	#NULL!	Supratentorial, Temporal Lobe	0	Seizures	8.01736	0	7.99999	1	5.39957	0	5.56725	0	6.82625	0	6.37251	0	3.43141	0	6.87493	1	0	0	8.4805	1	8.61894	0	1.06822	0	4.47274	0	5.36145
497	Oligodendroglioma	1	TCGA-VM-A8CA	0	13.5	0	13.5	0	#NULL!	0	54	0	1	70	#NULL!	1	#NULL!	1	#NULL!	Supratentorial, Frontal Lobe	0	Mental Status Changes	7.85638	0	7.24294	0	6.81839	0	6.19711	0	7.56566	0	6.57559	0	5.02114	0	6.73439	1	0	0	8.11676	0	8.6278	0	2.39751	0	5.49127	1	2.58151
498	Oligodendroglioma	4	TCGA-VM-A8CB	0	0.1	0	0.1	1	#NULL!	0	33	1	1	#NULL!	#NULL!	1	#NULL!	#NULL!	#NULL!	Supratentorial, Frontal Lobe	0	Seizures	7.48696	0	7.52782	1	6.75568	0	6.24101	0	7.42901	0	6.84837	1	4.51301	0	6.57395	1	0	0	8.06301	0	8.45786	0	3.7433	0	3.2984	0	3.08446
499	Astrocytoma	3	TCGA-VM-A8CD	1	7.88	1	7.88	1	#NULL!	0	58	1	0	100	1	0	#NULL!	0	0	Supratentorial, Temporal Lobe	0	Seizures	7.87047	0	8.0578	1	6.85192	0	5.65748	0	8.78325	1	6.88647	1	5.3681	1	5.95574	0	0.294757	1	8.58107	1	9.04496	1	3.24571	0	4.60236	0	6.02763
500	Oligodendroglioma	1	TCGA-VM-A8CE	0	39.13	1	26.77	0	#NULL!	0	25	0	1	90	0	1	#NULL!	1	#NULL!	Supratentorial, Frontal Lobe	0	Seizures	8.1272	1	7.25285	0	7.14173	0	7.26969	1	8.30949	1	6.84177	1	5.55871	1	6.39959	1	0	0	8.2041	0	9.01285	1	4.169	1	6.05006	1	1.4357
501	Astrocytoma	3	TCGA-VM-A8CF	0	20.01	0	20.01	1	#NULL!	1	44	1	0	60	1	1	#NULL!	0	1	Supratentorial, Frontal Lobe	0	Motor/Movement Changes	7.7803	0	7.52372	1	5.84692	0	5.93176	0	7.71543	0	6.9864	1	4.51236	0	7.14646	1	0	0	8.0594	0	8.4677	0	1.83848	0	4.65615	0	1.95193
502	Astrocytoma	0	TCGA-VM-A8CH	0	23.46	0	23.46	0	#NULL!	1	24	0	0	90	0	0	#NULL!	0	1	Supratentorial, Frontal Lobe	0	Seizures	8.07322	1	7.6753	1	7.31007	1	6.38955	0	7.9111	0	6.65197	0	5.28174	1	6.30723	1	0.664285	1	8.28542	0	8.6728	0	4.61009	1	4.52696	0	0.386282
503	Oligoastrocytoma	2	TCGA-VV-A829	0	37.02	0	37.02	0	#NULL!	0	44	1	2	60	1	1	#NULL!	1	#NULL!	Supratentorial, Frontal Lobe	0	Motor/Movement Changes	7.58142	0	6.99425	0	7.62955	1	6.70499	1	8.52794	1	6.86032	1	5.07705	0	6.64209	1	0	0	8.43937	1	8.08373	0	5.08353	1	3.83487	0	0.967744
504	Astrocytoma	3	TCGA-VV-A86M	0	16	0	16	1	#NULL!	1	36	1	0	60	1	1	#NULL!	1	#NULL!	Supratentorial, Frontal Lobe	0	Sensory Changes	7.53601	0	7.73901	1	7.61662	1	6.98882	1	7.79017	0	6.89754	1	4.65304	0	6.29806	0	0	0	8.50966	1	8.96232	1	4.71394	1	4.12432	0	1.46976
505	Oligodendroglioma	4	TCGA-VW-A7QS	0	23.19	0	23.19	1	#NULL!	1	35	1	1	#NULL!	0	0	#NULL!	1	#NULL!	Supratentorial, Frontal Lobe	0	Headaches	8.19865	1	7.25489	0	6.76635	0	6.26016	0	7.9294	0	6.9628	1	4.96521	0	6.20044	0	0	0	8.68737	1	8.46365	0	3.91861	0	4.63972	0	2.32722
506	Astrocytoma	3	TCGA-VW-A8FI	1	8.05	1	8.05	1	#NULL!	0	66	1	0	#NULL!	1	1	#NULL!	1	#NULL!	Supratentorial, Temporal Lobe	0	Mental Status Changes	8.44718	1	7.86324	1	6.28776	0	6.79084	1	7.77462	0	6.74129	1	4.78135	0	6.90123	1	1.52076	1	8.51285	1	8.08882	0	3.18809	0	5.38415	1	2.51147
507	Oligodendroglioma	1	TCGA-W9-A837	0	51.02	0	51.02	0	#NULL!	0	47	0	1	#NULL!	0	0	#NULL!	0	#NULL!	Supratentorial, Frontal Lobe	0	Seizures	7.93584	0	7.16456	0	7.57542	1	7.15435	1	8.54472	1	6.65311	0	5.42714	1	6.1225	0	0	0	8.17246	0	8.84317	1	4.38882	1	5.07115	1	2.20437
508	Astrocytoma	0	TCGA-WH-A86K	0	13.3	0	13.3	0	#NULL!	0	65	0	0	#NULL!	0	0	#NULL!	1	1	Supratentorial, Frontal Lobe	0	Motor/Movement Changes	8.35632	1	7.81987	1	6.90635	0	6.75778	1	7.73002	0	7.00703	1	5.54436	1	6.77659	1	0	0	8.11766	0	8.35913	0	3.45471	0	4.72009	0	0.470628
509	Astrocytoma	3	TCGA-WY-A858	0	43.92	0	43.92	1	#NULL!	1	32	1	0	100	1	1	#NULL!	1	#NULL!	Supratentorial, Frontal Lobe	0	Headaches	7.84544	0	7.64833	1	6.76363	0	6.14439	0	7.51067	0	6.82848	1	5.10349	0	6.5723	1	0	0	8.17448	0	8.63816	0	3.11483	0	4.58987	0	1.02751
510	Astrocytoma	0	TCGA-WY-A859	0	39.85	0	39.85	0	#NULL!	1	34	0	0	100	1	1	#NULL!	0	#NULL!	Supratentorial, Frontal Lobe	0	Seizures	7.95075	0	7.82603	1	7.4508	1	6.46974	0	8.19507	0	6.40272	0	5.25595	1	6.14154	0	0.961341	1	7.81161	0	8.43947	0	2.91478	0	4.82354	0	2.58595
511	Astrocytoma	0	TCGA-WY-A85A	0	43.36	0	43.36	0	#NULL!	0	20	0	0	80	0	0	#NULL!	0	#NULL!	Supratentorial, Frontal Lobe	0	Seizures	8.22125	1	7.92567	1	7.25271	0	6.47312	0	8.86121	1	6.72869	0	5.61168	1	6.60436	1	1.13507	1	8.39009	1	8.8322	1	4.29476	1	4.75419	0	1.29176
512	Astrocytoma	0	TCGA-WY-A85B	0	45.76	0	45.76	0	#NULL!	0	24	0	0	80	0	0	#NULL!	0	#NULL!	Supratentorial, Temporal Lobe	0	Seizures	8.12502	1	7.74852	1	7.21355	0	6.58053	0	7.68885	0	6.90229	1	5.00895	0	6.57142	1	0	0	8.35106	1	8.8565	1	4.40017	1	4.25245	0	0.620899
513	Astrocytoma	0	TCGA-WY-A85C	0	46.85	1	41.43	0	#NULL!	0	36	0	0	80	1	0	#NULL!	0	#NULL!	Supratentorial, Frontal Lobe	0	Headaches	8.3947	1	7.90998	1	7.60038	1	6.72068	1	8.19562	0	6.96935	1	5.29052	1	6.25872	0	0.342667	1	8.37124	1	8.61167	0	4.15785	0	4.53205	0	1.23895
514	Oligoastrocytoma	2	TCGA-WY-A85D	0	37.68	1	29.14	0	#NULL!	0	60	0	2	80	0	0	#NULL!	0	#NULL!	Supratentorial, Frontal Lobe	0	Sensory Changes	8.18584	1	7.73284	1	6.62599	0	6.66881	1	7.84706	0	6.80175	1	5.12177	0	7.02014	1	1.59834	1	7.8459	0	8.64009	0	2.42966	0	4.44061	0	0.400854
515	Oligoastrocytoma	2	TCGA-WY-A85E	0	20.8	1	17.48	0	#NULL!	1	48	0	2	80	0	1	#NULL!	0	#NULL!	Supratentorial, Frontal Lobe	0	Seizures	8.23873	1	8.05922	1	7.31753	1	7.3438	1	8.17947	0	6.93779	1	5.00461	0	6.32073	1	0.758092	1	8.42495	1	8.47366	0	4.85817	1	4.63182	0	2.14726
[truncated: 42 more columns]
